# Supplementary material for: Isolation and Characterization of Nanofibrillar Cellulose from Agave tequilana Weber Bagasse
Source: Hindawi journal article supplement (doi:10.1155/2019/1342547), 2019-02-12
Supplement: f1 [file 1342547.f1.pdf]

# Isolation and characterization of nanofibrillar cellulose from bagasse of *Agave tequilana* weber

Hasbleidy Palacios Hinestroza<sup>1</sup>, Javier A. Hernández Díaz<sup>1</sup>, Marianelly Esquivel Alfaro<sup>2</sup>, Guillermo Toriz<sup>3</sup>, Orlando J. Rojas<sup>4</sup> and Belkis C. Sulbarán-Rangel<sup>1</sup>

<sup>1</sup> Department of Water and Energy, University of Guadalajara Campus Tonalá, 45425, Mexico.

<sup>2</sup> Polymers Research Laboratory (POLIUNA), Chemistry Department, National University of Costa Rica, 3000, Costa Rica,

<sup>3</sup> Department of Wood, Cellulose and Paper, University of Guadalajara, 450110, Mexico

<sup>4</sup> Department of Bioproducts and Biosystems, School of Chemical Engineering, Aalto University, Espoo 00076, Finland.

Correspondence should be addressed to Belkis C. Sulbarán-Rangel;

[Belkis.sulbaran@academicos.udg.mx](mailto:Belkis.sulbaran@academicos.udg.mx)

## 1. Data of XRD spectra agave bagasse, cellulose organosolv and cellulose nanofibers

| Angle    | Agave bagasse | Cellulose Organosolve | CNF  |
|----------|---------------|-----------------------|------|
| 10.02353 | 2173          | 2717                  | 2501 |
| 10.04979 | 2323          | 2668                  | 2385 |
| 10.07605 | 2292          | 2722                  | 2433 |
| 10.10231 | 2263          | 2757                  | 2420 |
| 10.12857 | 2281          | 2713                  | 2417 |
| 10.15483 | 2240          | 2750                  | 2320 |
| 10.18109 | 2378          | 2644                  | 2455 |
| 10.20735 | 2218          | 2724                  | 2491 |
| 10.23361 | 2270          | 2701                  | 2257 |
| 10.25988 | 2368          | 2637                  | 2383 |
| 10.28614 | 2246          | 2734                  | 2529 |
| 10.3124  | 2256          | 2820                  | 2416 |
| 10.33866 | 2326          | 2829                  | 2523 |
| 10.36492 | 2273          | 2848                  | 2516 |
| 10.39118 | 2337          | 2824                  | 2478 |
| 10.41744 | 2309          | 2772                  | 2456 |
| 10.4437  | 2297          | 2718                  | 2491 |
| 10.46996 | 2341          | 2826                  | 2585 |
| 10.49622 | 2400          | 2942                  | 2602 |
| 10.52248 | 2284          | 2941                  | 2586 |
| 10.54874 | 2301          | 2863                  | 2606 |
| 10.575   | 2256          | 2915                  | 2646 |
| 10.60126 | 2240          | 2934                  | 2711 |
| 10.62752 | 2393          | 2957                  | 2617 |
| 10.65378 | 2412          | 2948                  | 2622 |

|          |      |      |      |
|----------|------|------|------|
| 10.68004 | 2300 | 2763 | 2611 |
| 10.7063  | 2288 | 2905 | 2748 |
| 10.73257 | 2314 | 2953 | 2755 |
| 10.75883 | 2391 | 2959 | 2573 |
| 10.78509 | 2374 | 3091 | 2751 |
| 10.81135 | 2451 | 3041 | 2688 |
| 10.83761 | 2443 | 3104 | 2755 |
| 10.86387 | 2353 | 3105 | 2745 |
| 10.89013 | 2262 | 2983 | 2826 |
| 10.91639 | 2358 | 3070 | 2821 |
| 10.94265 | 2332 | 3120 | 2892 |
| 10.96891 | 2399 | 3155 | 2909 |
| 10.99517 | 2441 | 3019 | 2902 |
| 11.02143 | 2279 | 3167 | 2968 |
| 11.04769 | 2265 | 3233 | 2978 |
| 11.07395 | 2412 | 3138 | 2935 |
| 11.10021 | 2343 | 3255 | 2907 |
| 11.12647 | 2269 | 3155 | 3003 |
| 11.15273 | 2458 | 3263 | 3068 |
| 11.179   | 2446 | 3320 | 3075 |
| 11.20526 | 2370 | 3295 | 3112 |
| 11.23152 | 2437 | 3361 | 3136 |
| 11.25778 | 2438 | 3456 | 3209 |
| 11.28404 | 2337 | 3385 | 3163 |
| 11.3103  | 2468 | 3412 | 3242 |
| 11.33656 | 2430 | 3539 | 3280 |
| 11.36282 | 2423 | 3511 | 3211 |
| 11.38908 | 2331 | 3407 | 3363 |
| 11.41534 | 2409 | 3495 | 3447 |
| 11.4416  | 2475 | 3603 | 3429 |
| 11.46786 | 2390 | 3504 | 3430 |
| 11.49412 | 2536 | 3559 | 3469 |
| 11.52038 | 2425 | 3674 | 3515 |
| 11.54664 | 2469 | 3577 | 3590 |
| 11.5729  | 2414 | 3539 | 3578 |
| 11.59916 | 2451 | 3593 | 3583 |
| 11.62542 | 2431 | 3706 | 3580 |
| 11.65169 | 2461 | 3666 | 3726 |
| 11.67795 | 2481 | 3658 | 3583 |
| 11.70421 | 2494 | 3592 | 3745 |
| 11.73047 | 2470 | 3695 | 3679 |
| 11.75673 | 2563 | 3661 | 3827 |
| 11.78299 | 2500 | 3706 | 3749 |

|          |      |      |      |
|----------|------|------|------|
| 11.80925 | 2516 | 3676 | 3727 |
| 11.83551 | 2485 | 3735 | 3634 |
| 11.86177 | 2537 | 3758 | 3859 |
| 11.88803 | 2438 | 3618 | 3686 |
| 11.91429 | 2514 | 3715 | 3803 |
| 11.94055 | 2548 | 3745 | 3843 |
| 11.96681 | 2516 | 3575 | 3907 |
| 11.99307 | 2522 | 3719 | 3741 |
| 12.01933 | 2579 | 3794 | 3847 |
| 12.04559 | 2560 | 3728 | 3811 |
| 12.07185 | 2500 | 3565 | 3818 |
| 12.09811 | 2541 | 3577 | 3843 |
| 12.12438 | 2455 | 3650 | 3691 |
| 12.15064 | 2487 | 3733 | 3676 |
| 12.1769  | 2646 | 3777 | 3792 |
| 12.20316 | 2468 | 3539 | 3769 |
| 12.22942 | 2510 | 3572 | 3786 |
| 12.25568 | 2571 | 3604 | 3644 |
| 12.28194 | 2522 | 3617 | 3780 |
| 12.3082  | 2636 | 3539 | 3727 |
| 12.33446 | 2464 | 3574 | 3745 |
| 12.36072 | 2510 | 3578 | 3707 |
| 12.38698 | 2513 | 3676 | 3597 |
| 12.41324 | 2479 | 3551 | 3582 |
| 12.4395  | 2491 | 3555 | 3561 |
| 12.46576 | 2463 | 3434 | 3590 |
| 12.49202 | 2572 | 3381 | 3474 |
| 12.51828 | 2506 | 3460 | 3489 |
| 12.54454 | 2561 | 3467 | 3285 |
| 12.57081 | 2497 | 3438 | 3357 |
| 12.59707 | 2464 | 3485 | 3398 |
| 12.62333 | 2379 | 3315 | 3299 |
| 12.64959 | 2468 | 3265 | 3314 |
| 12.67585 | 2382 | 3384 | 3155 |
| 12.70211 | 2479 | 3355 | 3147 |
| 12.72837 | 2519 | 3218 | 3318 |
| 12.75463 | 2423 | 3174 | 3177 |
| 12.78089 | 2424 | 3253 | 3201 |
| 12.80715 | 2402 | 3372 | 3148 |
| 12.83341 | 2417 | 3258 | 3137 |
| 12.85967 | 2399 | 3101 | 3049 |
| 12.88593 | 2407 | 3212 | 3132 |
| 12.91219 | 2381 | 3195 | 3027 |

|          |      |      |      |
|----------|------|------|------|
| 12.93845 | 2415 | 3232 | 3044 |
| 12.96471 | 2364 | 3244 | 2990 |
| 12.99097 | 2376 | 3060 | 2964 |
| 13.01723 | 2410 | 3106 | 2844 |
| 13.0435  | 2318 | 3116 | 2955 |
| 13.06976 | 2356 | 3054 | 2839 |
| 13.09602 | 2276 | 3111 | 2880 |
| 13.12228 | 2273 | 3123 | 2772 |
| 13.14854 | 2281 | 2982 | 2855 |
| 13.1748  | 2389 | 2985 | 2782 |
| 13.20106 | 2369 | 3018 | 2770 |
| 13.22732 | 2285 | 2937 | 2762 |
| 13.25358 | 2321 | 3052 | 2661 |
| 13.27984 | 2267 | 2933 | 2645 |
| 13.3061  | 2316 | 3011 | 2666 |
| 13.33236 | 2185 | 2998 | 2628 |
| 13.35862 | 2269 | 2974 | 2734 |
| 13.38488 | 2245 | 2976 | 2713 |
| 13.41114 | 2235 | 2946 | 2686 |
| 13.4374  | 2261 | 2998 | 2536 |
| 13.46366 | 2149 | 2976 | 2597 |
| 13.48992 | 2249 | 2888 | 2594 |
| 13.51619 | 2246 | 3006 | 2664 |
| 13.54245 | 2237 | 2958 | 2637 |
| 13.56871 | 2137 | 2968 | 2611 |
| 13.59497 | 2177 | 2973 | 2535 |
| 13.62123 | 2005 | 2822 | 2623 |
| 13.64749 | 2122 | 2943 | 2593 |
| 13.67375 | 2162 | 2910 | 2568 |
| 13.70001 | 2103 | 2935 | 2490 |
| 13.72627 | 2114 | 2836 | 2619 |
| 13.75253 | 2051 | 2810 | 2559 |
| 13.77879 | 2193 | 2857 | 2600 |
| 13.80505 | 2264 | 2879 | 2578 |
| 13.83131 | 2182 | 2877 | 2617 |
| 13.85757 | 2205 | 2923 | 2559 |
| 13.88383 | 2115 | 2806 | 2635 |
| 13.91009 | 2176 | 2953 | 2540 |
| 13.93635 | 2247 | 2894 | 2595 |
| 13.96262 | 2183 | 3009 | 2580 |
| 13.98888 | 2167 | 2795 | 2548 |
| 14.01514 | 2168 | 2883 | 2520 |
| 14.0414  | 2172 | 2883 | 2539 |

|          |      |      |      |
|----------|------|------|------|
| 14.06766 | 2253 | 2869 | 2488 |
| 14.09392 | 2201 | 2848 | 2498 |
| 14.12018 | 2284 | 3002 | 2618 |
| 14.14644 | 2310 | 2915 | 2632 |
| 14.1727  | 2243 | 2805 | 2639 |
| 14.19896 | 2305 | 2767 | 2653 |
| 14.22522 | 2255 | 2790 | 2542 |
| 14.25148 | 2347 | 2871 | 2563 |
| 14.27774 | 2306 | 2944 | 2573 |
| 14.304   | 2446 | 2890 | 2601 |
| 14.33026 | 2376 | 3062 | 2570 |
| 14.35652 | 2494 | 2845 | 2615 |
| 14.38278 | 2347 | 2953 | 2518 |
| 14.40904 | 2318 | 2871 | 2629 |
| 14.43531 | 2423 | 2992 | 2532 |
| 14.46157 | 2355 | 2919 | 2594 |
| 14.48783 | 2486 | 3022 | 2603 |
| 14.51409 | 2393 | 3036 | 2627 |
| 14.54035 | 2434 | 3108 | 2617 |
| 14.56661 | 2600 | 3040 | 2593 |
| 14.59287 | 2572 | 2990 | 2655 |
| 14.61913 | 2426 | 2962 | 2524 |
| 14.64539 | 2508 | 3014 | 2563 |
| 14.67165 | 2494 | 2947 | 2594 |
| 14.69791 | 2590 | 3018 | 2610 |
| 14.72417 | 2586 | 3199 | 2442 |
| 14.75043 | 2543 | 3110 | 2667 |
| 14.77669 | 2580 | 3167 | 2543 |
| 14.80295 | 2677 | 3486 | 2549 |
| 14.82921 | 2523 | 3532 | 2618 |
| 14.85547 | 2580 | 3909 | 2572 |
| 14.88173 | 2448 | 4714 | 2633 |
| 14.908   | 2604 | 4042 | 2558 |
| 14.93426 | 2536 | 3495 | 2599 |
| 14.96052 | 2577 | 3098 | 2492 |
| 14.98678 | 2496 | 3120 | 2598 |
| 15.01304 | 2553 | 3127 | 2566 |
| 15.0393  | 2482 | 3080 | 2470 |
| 15.06556 | 2533 | 3091 | 2471 |
| 15.09182 | 2605 | 3058 | 2504 |
| 15.11808 | 2468 | 3127 | 2540 |
| 15.14434 | 2509 | 2967 | 2524 |
| 15.1706  | 2511 | 3094 | 2672 |

|          |      |      |      |
|----------|------|------|------|
| 15.19686 | 2522 | 3061 | 2542 |
| 15.22312 | 2583 | 2967 | 2525 |
| 15.24938 | 2569 | 3024 | 2523 |
| 15.27564 | 2490 | 2897 | 2617 |
| 15.3019  | 2519 | 2885 | 2542 |
| 15.32816 | 2440 | 2914 | 2525 |
| 15.35442 | 2413 | 2836 | 2538 |
| 15.38069 | 2323 | 2889 | 2573 |
| 15.40695 | 2414 | 2859 | 2589 |
| 15.43321 | 2348 | 2928 | 2553 |
| 15.45947 | 2408 | 2761 | 2563 |
| 15.48573 | 2380 | 2959 | 2687 |
| 15.51199 | 2353 | 2837 | 2553 |
| 15.53825 | 2248 | 2792 | 2630 |
| 15.56451 | 2174 | 2937 | 2597 |
| 15.59077 | 2173 | 2909 | 2464 |
| 15.61703 | 2125 | 3028 | 2591 |
| 15.64329 | 2222 | 3016 | 2545 |
| 15.66955 | 2097 | 2943 | 2556 |
| 15.69581 | 2151 | 2883 | 2574 |
| 15.72207 | 2139 | 2927 | 2560 |
| 15.74833 | 1942 | 2954 | 2527 |
| 15.77459 | 2083 | 2910 | 2602 |
| 15.80085 | 2070 | 2892 | 2641 |
| 15.82712 | 2003 | 2986 | 2527 |
| 15.85338 | 2069 | 2931 | 2562 |
| 15.87964 | 2115 | 2936 | 2499 |
| 15.9059  | 1992 | 2911 | 2600 |
| 15.93216 | 2022 | 2962 | 2695 |
| 15.95842 | 2058 | 2967 | 2595 |
| 15.98468 | 2049 | 2965 | 2646 |
| 16.01094 | 2124 | 2947 | 2609 |
| 16.0372  | 1953 | 2999 | 2593 |
| 16.06346 | 2012 | 2990 | 2618 |
| 16.08972 | 2057 | 3085 | 2562 |
| 16.11598 | 2072 | 3013 | 2643 |
| 16.14224 | 2115 | 2957 | 2578 |
| 16.1685  | 2103 | 3023 | 2714 |
| 16.19476 | 2060 | 2964 | 2632 |
| 16.22102 | 2004 | 3007 | 2666 |
| 16.24728 | 1950 | 3057 | 2720 |
| 16.27354 | 2066 | 2988 | 2675 |
| 16.29981 | 1989 | 3036 | 2666 |

|          |      |      |      |
|----------|------|------|------|
| 16.32607 | 1995 | 2996 | 2667 |
| 16.35233 | 1881 | 3088 | 2588 |
| 16.37859 | 2101 | 2877 | 2666 |
| 16.40485 | 1987 | 2992 | 2626 |
| 16.43111 | 1935 | 3043 | 2689 |
| 16.45737 | 2101 | 3112 | 2599 |
| 16.48363 | 1987 | 3125 | 2703 |
| 16.50989 | 1929 | 3138 | 2736 |
| 16.53615 | 2021 | 3073 | 2690 |
| 16.56241 | 2070 | 3087 | 2607 |
| 16.58867 | 1961 | 3111 | 2644 |
| 16.61493 | 2013 | 3093 | 2698 |
| 16.64119 | 1922 | 3128 | 2690 |
| 16.66745 | 1994 | 3197 | 2664 |
| 16.69371 | 1984 | 3259 | 2893 |
| 16.71997 | 2050 | 3241 | 2707 |
| 16.74623 | 1953 | 3224 | 2662 |
| 16.7725  | 1996 | 3064 | 2761 |
| 16.79876 | 1980 | 3224 | 2725 |
| 16.82502 | 2137 | 3174 | 2715 |
| 16.85128 | 2042 | 3219 | 2747 |
| 16.87754 | 2048 | 3260 | 2741 |
| 16.9038  | 2047 | 3346 | 2727 |
| 16.93006 | 2055 | 3232 | 2744 |
| 16.95632 | 2019 | 3287 | 2794 |
| 16.98258 | 2077 | 3265 | 2848 |
| 17.00884 | 1968 | 3309 | 2792 |
| 17.0351  | 2000 | 3288 | 2780 |
| 17.06136 | 2155 | 3265 | 2787 |
| 17.08762 | 2182 | 3370 | 2699 |
| 17.11388 | 2081 | 3425 | 2792 |
| 17.14014 | 2143 | 3353 | 2823 |
| 17.1664  | 2138 | 3269 | 2702 |
| 17.19266 | 2139 | 3294 | 2798 |
| 17.21893 | 2129 | 3300 | 2797 |
| 17.24519 | 2187 | 3237 | 2822 |
| 17.27145 | 2083 | 3306 | 2817 |
| 17.29771 | 2102 | 3315 | 2733 |
| 17.32397 | 2143 | 3323 | 2769 |
| 17.35023 | 2173 | 3273 | 2784 |
| 17.37649 | 2047 | 3279 | 2854 |
| 17.40275 | 2114 | 3293 | 2775 |
| 17.42901 | 2131 | 3247 | 2819 |

|          |      |      |      |
|----------|------|------|------|
| 17.45527 | 2132 | 3432 | 2780 |
| 17.48153 | 2092 | 3362 | 2791 |
| 17.50779 | 2127 | 3378 | 2855 |
| 17.53405 | 2142 | 3478 | 2817 |
| 17.56031 | 2116 | 3433 | 2848 |
| 17.58657 | 2227 | 3449 | 2792 |
| 17.61283 | 2165 | 3451 | 2819 |
| 17.63909 | 2207 | 3428 | 2740 |
| 17.66535 | 2109 | 3524 | 2874 |
| 17.69162 | 2176 | 3454 | 2823 |
| 17.71788 | 2278 | 3487 | 2873 |
| 17.74414 | 2184 | 3436 | 2950 |
| 17.7704  | 2208 | 3576 | 3010 |
| 17.79666 | 2241 | 3559 | 2963 |
| 17.82292 | 2216 | 3504 | 3085 |
| 17.84918 | 2230 | 3611 | 2968 |
| 17.87544 | 2239 | 3543 | 2939 |
| 17.9017  | 2196 | 3611 | 3092 |
| 17.92796 | 2145 | 3599 | 3041 |
| 17.95422 | 2211 | 3566 | 2880 |
| 17.98048 | 2264 | 3665 | 3101 |
| 18.00674 | 2273 | 3624 | 3063 |
| 18.033   | 2248 | 3630 | 3068 |
| 18.05926 | 2264 | 3716 | 3135 |
| 18.08552 | 2286 | 3758 | 3187 |
| 18.11178 | 2232 | 3783 | 3175 |
| 18.13804 | 2339 | 3845 | 3286 |
| 18.16431 | 2266 | 3853 | 3215 |
| 18.19057 | 2333 | 3891 | 3154 |
| 18.21683 | 2397 | 3872 | 3189 |
| 18.24309 | 2404 | 3935 | 3268 |
| 18.26935 | 2418 | 3975 | 3388 |
| 18.29561 | 2374 | 4040 | 3318 |
| 18.32187 | 2383 | 3980 | 3362 |
| 18.34813 | 2400 | 4028 | 3291 |
| 18.37439 | 2405 | 4045 | 3324 |
| 18.40065 | 2462 | 4184 | 3417 |
| 18.42691 | 2415 | 4092 | 3372 |
| 18.45317 | 2436 | 4186 | 3623 |
| 18.47943 | 2535 | 4244 | 3532 |
| 18.50569 | 2542 | 4406 | 3603 |
| 18.53195 | 2508 | 4279 | 3652 |
| 18.55821 | 2568 | 4307 | 3735 |



|          |      |      |      |
|----------|------|------|------|
| 18.58447 | 2569 | 4414 | 3736 |
| 18.61074 | 2645 | 4400 | 3843 |
| 18.637   | 2616 | 4443 | 3884 |
| 18.66326 | 2548 | 4676 | 3814 |
| 18.68952 | 2626 | 4546 | 3977 |
| 18.71578 | 2668 | 4672 | 4038 |
| 18.74204 | 2658 | 4791 | 3914 |
| 18.7683  | 2738 | 4854 | 4137 |
| 18.79456 | 2673 | 4817 | 4234 |
| 18.82082 | 2766 | 4933 | 4316 |
| 18.84708 | 2667 | 4985 | 4382 |
| 18.87334 | 2875 | 5197 | 4404 |
| 18.8996  | 2815 | 5054 | 4648 |
| 18.92586 | 2902 | 5131 | 4466 |
| 18.95212 | 2997 | 5331 | 4721 |
| 18.97838 | 2884 | 5482 | 4870 |
| 19.00464 | 3071 | 5590 | 5035 |
| 19.0309  | 2882 | 5514 | 4829 |
| 19.05716 | 2998 | 5523 | 5229 |
| 19.08343 | 3101 | 5584 | 5148 |
| 19.10969 | 3085 | 5781 | 5371 |
| 19.13595 | 3127 | 6038 | 5369 |
| 19.16221 | 3074 | 6059 | 5587 |
| 19.18847 | 3213 | 6146 | 5732 |
| 19.21473 | 3226 | 6240 | 5814 |
| 19.24099 | 3178 | 6275 | 5845 |
| 19.26725 | 3308 | 6411 | 6300 |
| 19.29351 | 3277 | 6550 | 6239 |
| 19.31977 | 3477 | 6600 | 6169 |
| 19.34603 | 3467 | 6728 | 6454 |
| 19.37229 | 3463 | 6884 | 6542 |
| 19.39855 | 3514 | 6919 | 6704 |
| 19.42481 | 3590 | 7063 | 6829 |
| 19.45107 | 3565 | 7093 | 6937 |
| 19.47733 | 3776 | 7060 | 6978 |
| 19.50359 | 3714 | 7257 | 6928 |
| 19.52985 | 3730 | 7321 | 7195 |
| 19.55612 | 3697 | 7573 | 7539 |
| 19.58238 | 3927 | 7509 | 7573 |
| 19.60864 | 3920 | 7608 | 7668 |
| 19.6349  | 3992 | 7609 | 7989 |
| 19.66116 | 3978 | 7801 | 7958 |
| 19.68742 | 4013 | 7835 | 8024 |

|          |      |      |      |
|----------|------|------|------|
| 19.71368 | 4185 | 7714 | 8074 |
| 19.73994 | 4056 | 7873 | 8072 |
| 19.7662  | 4133 | 7862 | 8277 |
| 19.79246 | 4356 | 7980 | 8137 |
| 19.81872 | 4250 | 7996 | 8378 |
| 19.84498 | 4285 | 7919 | 8143 |
| 19.87124 | 4391 | 7933 | 8335 |
| 19.8975  | 4536 | 7903 | 8465 |
| 19.92376 | 4481 | 8117 | 8517 |
| 19.95002 | 4525 | 7930 | 8473 |
| 19.97628 | 4459 | 8130 | 8570 |
| 20.00254 | 4615 | 8102 | 8400 |
| 20.02881 | 4609 | 8121 | 8483 |
| 20.05507 | 4582 | 8077 | 8517 |
| 20.08133 | 4743 | 7839 | 8343 |
| 20.10759 | 4736 | 7952 | 8351 |
| 20.13385 | 4748 | 8020 | 8239 |
| 20.16011 | 4823 | 8005 | 8191 |
| 20.18637 | 4780 | 7953 | 8139 |
| 20.21263 | 4806 | 7901 | 7901 |
| 20.23889 | 4850 | 7606 | 7819 |
| 20.26515 | 5005 | 7924 | 8094 |
| 20.29141 | 5056 | 7842 | 7941 |
| 20.31767 | 4992 | 7666 | 7919 |
| 20.34393 | 4893 | 7595 | 7736 |
| 20.37019 | 4909 | 7706 | 7552 |
| 20.39645 | 4882 | 7434 | 7475 |
| 20.42271 | 4907 | 7573 | 7545 |
| 20.44897 | 5030 | 7231 | 7488 |
| 20.47524 | 4914 | 7577 | 7212 |
| 20.5015  | 4849 | 7322 | 7329 |
| 20.52776 | 4903 | 7355 | 7295 |
| 20.55402 | 4799 | 7367 | 7383 |
| 20.58028 | 4822 | 7312 | 7161 |
| 20.60654 | 4936 | 7216 | 7073 |
| 20.6328  | 5040 | 7440 | 7132 |
| 20.65906 | 4949 | 7303 | 7124 |
| 20.68532 | 4916 | 7121 | 7082 |
| 20.71158 | 4914 | 7107 | 7018 |
| 20.73784 | 4855 | 7175 | 7208 |
| 20.7641  | 4909 | 7182 | 7030 |
| 20.79036 | 4781 | 7233 | 6931 |
| 20.81662 | 4750 | 7213 | 6915 |

|          |      |      |      |
|----------|------|------|------|
| 20.84288 | 4754 | 7130 | 6996 |
| 20.86914 | 4888 | 7134 | 7037 |
| 20.8954  | 4816 | 7165 | 7091 |
| 20.92166 | 4662 | 7354 | 7082 |
| 20.94793 | 4709 | 7300 | 7155 |
| 20.97419 | 4721 | 7112 | 7247 |
| 21.00045 | 4790 | 7298 | 7099 |
| 21.02671 | 4741 | 7504 | 7153 |
| 21.05297 | 4683 | 7363 | 7181 |
| 21.07923 | 4758 | 7444 | 7258 |
| 21.10549 | 4723 | 7306 | 7616 |
| 21.13175 | 4678 | 7486 | 7239 |
| 21.15801 | 4660 | 7350 | 7585 |
| 21.18427 | 4734 | 7239 | 7543 |
| 21.21053 | 4661 | 7513 | 7505 |
| 21.23679 | 4708 | 7406 | 7734 |
| 21.26305 | 4759 | 7523 | 7791 |
| 21.28931 | 4747 | 7628 | 7635 |
| 21.31557 | 4612 | 7569 | 7756 |
| 21.34183 | 4790 | 7776 | 7900 |
| 21.36809 | 4650 | 7661 | 8025 |
| 21.39435 | 4643 | 7528 | 8214 |
| 21.42062 | 4713 | 7617 | 8114 |
| 21.44688 | 4689 | 7404 | 8274 |
| 21.47314 | 4658 | 7524 | 8052 |
| 21.4994  | 4703 | 7521 | 8244 |
| 21.52566 | 4559 | 7534 | 8403 |
| 21.55192 | 4696 | 7655 | 8498 |
| 21.57818 | 4654 | 7686 | 8470 |
| 21.60444 | 4589 | 7589 | 8666 |
| 21.6307  | 4782 | 7449 | 8684 |
| 21.65696 | 4656 | 7519 | 8617 |
| 21.68322 | 4687 | 7452 | 8750 |
| 21.70948 | 4572 | 7453 | 8822 |
| 21.73574 | 4664 | 7416 | 8641 |
| 21.762   | 4754 | 7418 | 8636 |
| 21.78826 | 4782 | 7211 | 8833 |
| 21.81452 | 4418 | 7337 | 8491 |
| 21.84078 | 4560 | 7226 | 8643 |
| 21.86705 | 4598 | 7019 | 8644 |
| 21.89331 | 4539 | 6997 | 8682 |
| 21.91957 | 4635 | 6978 | 8602 |
| 21.94583 | 4484 | 6980 | 8475 |

|          |      |      |      |
|----------|------|------|------|
| 21.97209 | 4501 | 6933 | 8402 |
| 21.99835 | 4638 | 6893 | 8202 |
| 22.02461 | 4578 | 6758 | 8301 |
| 22.05087 | 4356 | 6869 | 8136 |
| 22.07713 | 4510 | 6653 | 8102 |
| 22.10339 | 4430 | 6658 | 8069 |
| 22.12965 | 4443 | 6542 | 7898 |
| 22.15591 | 4399 | 6297 | 7848 |
| 22.18217 | 4398 | 6326 | 7787 |
| 22.20843 | 4267 | 6090 | 7417 |
| 22.23469 | 4339 | 6172 | 7487 |
| 22.26095 | 4363 | 6048 | 7307 |
| 22.28721 | 4248 | 5898 | 7169 |
| 22.31347 | 4175 | 5913 | 7108 |
| 22.33974 | 4177 | 5900 | 6883 |
| 22.366   | 4076 | 5687 | 6755 |
| 22.39226 | 4141 | 5587 | 6854 |
| 22.41852 | 3944 | 5571 | 6502 |
| 22.44478 | 3986 | 5482 | 6468 |
| 22.47104 | 4065 | 5390 | 6208 |
| 22.4973  | 3951 | 5317 | 6135 |
| 22.52356 | 3860 | 5307 | 5959 |
| 22.54982 | 3984 | 5202 | 5818 |
| 22.57608 | 3784 | 5067 | 5942 |
| 22.60234 | 3794 | 5071 | 5641 |
| 22.6286  | 3713 | 4960 | 5578 |
| 22.65486 | 3732 | 4875 | 5548 |
| 22.68112 | 3677 | 4773 | 5278 |
| 22.70738 | 3675 | 4704 | 5159 |
| 22.73364 | 3622 | 4654 | 5034 |
| 22.7599  | 3683 | 4531 | 5045 |
| 22.78616 | 3530 | 4524 | 4924 |
| 22.81243 | 3438 | 4646 | 4796 |
| 22.83869 | 3477 | 4334 | 4621 |
| 22.86495 | 3435 | 4424 | 4699 |
| 22.89121 | 3451 | 4366 | 4348 |
| 22.91747 | 3243 | 4222 | 4488 |
| 22.94373 | 3416 | 4227 | 4352 |
| 22.96999 | 3233 | 4310 | 4230 |
| 22.99625 | 3200 | 4184 | 4180 |
| 23.02251 | 3281 | 4070 | 4247 |
| 23.04877 | 3190 | 4016 | 4057 |
| 23.07503 | 3162 | 3970 | 3978 |

|          |      |      |      |
|----------|------|------|------|
| 23.10129 | 3092 | 3987 | 3863 |
| 23.12755 | 3086 | 3963 | 3860 |
| 23.15381 | 3112 | 3882 | 3654 |
| 23.18007 | 3113 | 3845 | 3763 |
| 23.20633 | 2908 | 3829 | 3673 |
| 23.23259 | 3014 | 3778 | 3552 |
| 23.25886 | 2896 | 3800 | 3524 |
| 23.28512 | 2949 | 3659 | 3614 |
| 23.31138 | 2870 | 3769 | 3435 |
| 23.33764 | 2800 | 3697 | 3563 |
| 23.3639  | 2809 | 3659 | 3314 |
| 23.39016 | 2760 | 3628 | 3408 |
| 23.41642 | 2689 | 3635 | 3326 |
| 23.44268 | 2698 | 3570 | 3233 |
| 23.46894 | 2731 | 3504 | 3244 |
| 23.4952  | 2719 | 3442 | 3266 |
| 23.52146 | 2760 | 3372 | 3143 |
| 23.54772 | 2701 | 3373 | 3180 |
| 23.57398 | 2570 | 3380 | 3107 |
| 23.60024 | 2638 | 3303 | 3061 |
| 23.6265  | 2610 | 3315 | 2888 |
| 23.65276 | 2586 | 3260 | 2940 |
| 23.67902 | 2551 | 3314 | 2911 |
| 23.70528 | 2590 | 3259 | 2914 |
| 23.73155 | 2538 | 3341 | 2976 |
| 23.75781 | 2538 | 3482 | 2836 |
| 23.78407 | 2475 | 3397 | 2760 |
| 23.81033 | 2470 | 3386 | 2699 |
| 23.83659 | 2443 | 3385 | 2764 |
| 23.86285 | 2465 | 3129 | 2757 |
| 23.88911 | 2534 | 3111 | 2824 |
| 23.91537 | 2422 | 3131 | 2660 |
| 23.94163 | 2583 | 3173 | 2605 |
| 23.96789 | 2453 | 3127 | 2616 |
| 23.99415 | 2485 | 3163 | 2581 |
| 24.02041 | 2457 | 3204 | 2559 |
| 24.04667 | 2471 | 3327 | 2626 |
| 24.07293 | 2510 | 3332 | 2536 |
| 24.09919 | 2399 | 3473 | 2533 |
| 24.12545 | 2420 | 3938 | 2602 |
| 24.15171 | 2346 | 4106 | 2435 |
| 24.17797 | 2435 | 4671 | 2479 |
| 24.20424 | 2408 | 4463 | 2435 |

|          |      |      |      |
|----------|------|------|------|
| 24.2305  | 2441 | 4143 | 2401 |
| 24.25676 | 2521 | 4645 | 2413 |
| 24.28302 | 2425 | 4332 | 2395 |
| 24.30928 | 2498 | 4636 | 2449 |
| 24.33554 | 2437 | 3723 | 2290 |
| 24.3618  | 2393 | 4647 | 2297 |
| 24.38806 | 2495 | 3572 | 2268 |
| 24.41432 | 2494 | 3387 | 2408 |
| 24.44058 | 2457 | 3301 | 2346 |
| 24.46684 | 2503 | 2908 | 2380 |
| 24.4931  | 2477 | 2764 | 2286 |
| 24.51936 | 2505 | 2842 | 2246 |
| 24.54562 | 2570 | 2762 | 2268 |
| 24.57188 | 2559 | 2801 | 2223 |
| 24.59814 | 2607 | 2793 | 2327 |
| 24.6244  | 2571 | 2638 | 2212 |
| 24.65066 | 2486 | 2774 | 2269 |
| 24.67693 | 2541 | 2730 | 2189 |
| 24.70319 | 2491 | 2738 | 2253 |
| 24.72945 | 2524 | 2750 | 2204 |
| 24.75571 | 2478 | 2750 | 2177 |
| 24.78197 | 2482 | 2575 | 2264 |
| 24.80823 | 2481 | 2758 | 2168 |
| 24.83449 | 2372 | 2689 | 2196 |
| 24.86075 | 2326 | 2591 | 2143 |
| 24.88701 | 2458 | 2783 | 2119 |
| 24.91327 | 2328 | 2713 | 2147 |
| 24.93953 | 2273 | 2622 | 2132 |
| 24.96579 | 2386 | 2622 | 2142 |
| 24.99205 | 2302 | 2580 | 2168 |
| 25.01831 | 2321 | 2640 | 2099 |
| 25.04457 | 2326 | 2747 | 2127 |
| 25.07083 | 2302 | 2571 | 2070 |
| 25.09709 | 2228 | 2666 | 2045 |
| 25.12336 | 2216 | 2582 | 2028 |
| 25.14962 | 2162 | 2642 | 2115 |
| 25.17588 | 2093 | 2659 | 2077 |
| 25.20214 | 2166 | 2704 | 2007 |
| 25.2284  | 2030 | 2665 | 2026 |
| 25.25466 | 2091 | 2679 | 2074 |
| 25.28092 | 2040 | 2572 | 1950 |
| 25.30718 | 2039 | 2687 | 2072 |
| 25.33344 | 2061 | 2651 | 2097 |

|          |      |      |      |
|----------|------|------|------|
| 25.3597  | 2141 | 2637 | 2041 |
| 25.38596 | 2017 | 2568 | 2149 |
| 25.41222 | 2046 | 2643 | 2194 |
| 25.43848 | 2064 | 2621 | 2032 |
| 25.46474 | 2049 | 2755 | 2116 |
| 25.491   | 2051 | 2598 | 2068 |
| 25.51726 | 2002 | 2693 | 2069 |
| 25.54352 | 1990 | 2687 | 2139 |
| 25.56978 | 2016 | 2685 | 2079 |
| 25.59605 | 1982 | 2686 | 2083 |
| 25.62231 | 2003 | 2574 | 2121 |
| 25.64857 | 2000 | 2586 | 2024 |
| 25.67483 | 1991 | 2672 | 2079 |
| 25.70109 | 1930 | 2673 | 2099 |
| 25.72735 | 2000 | 2608 | 2064 |
| 25.75361 | 1975 | 2683 | 2116 |
| 25.77987 | 2003 | 2583 | 2075 |
| 25.80613 | 1994 | 2711 | 2051 |
| 25.83239 | 2002 | 2611 | 2011 |
| 25.85865 | 2052 | 2578 | 2095 |
| 25.88491 | 1937 | 2586 | 2070 |
| 25.91117 | 1972 | 2609 | 2105 |
| 25.93743 | 1984 | 2686 | 2120 |
| 25.96369 | 2049 | 2627 | 1992 |
| 25.98995 | 2040 | 2511 | 2036 |
| 26.01621 | 1999 | 2549 | 2109 |
| 26.04247 | 2002 | 2524 | 2032 |
| 26.06874 | 1972 | 2635 | 2078 |
| 26.095   | 2019 | 2657 | 2033 |
| 26.12126 | 1957 | 2623 | 1956 |
| 26.14752 | 2027 | 2574 | 2019 |
| 26.17378 | 1982 | 2622 | 2051 |
| 26.20004 | 2043 | 2532 | 2013 |
| 26.2263  | 1922 | 2660 | 1883 |
| 26.25256 | 1920 | 2580 | 1976 |
| 26.27882 | 2014 | 2535 | 2028 |
| 26.30508 | 1986 | 2534 | 2040 |
| 26.33134 | 1910 | 2530 | 2077 |
| 26.3576  | 1937 | 2537 | 1977 |
| 26.38386 | 1950 | 2555 | 1923 |
| 26.41012 | 1936 | 2503 | 2025 |
| 26.43638 | 1978 | 2532 | 2027 |
| 26.46264 | 2033 | 2456 | 1916 |

|          |      |      |      |
|----------|------|------|------|
| 26.4889  | 1924 | 2483 | 1919 |
| 26.51517 | 2013 | 2500 | 1980 |
| 26.54143 | 1950 | 2531 | 1916 |
| 26.56769 | 1926 | 2533 | 1900 |
| 26.59395 | 2014 | 2543 | 1892 |
| 26.62021 | 1952 | 2398 | 1905 |
| 26.64647 | 1976 | 2474 | 1850 |
| 26.67273 | 1950 | 2510 | 1892 |
| 26.69899 | 1916 | 2533 | 1966 |
| 26.72525 | 1997 | 2526 | 1874 |
| 26.75151 | 1902 | 2445 | 1897 |
| 26.77777 | 1961 | 2521 | 1841 |
| 26.80403 | 1922 | 2346 | 1876 |
| 26.83029 | 1898 | 2395 | 1807 |
| 26.85655 | 1969 | 2428 | 1912 |
| 26.88281 | 1935 | 2458 | 1862 |
| 26.90907 | 1961 | 2501 | 1928 |
| 26.93533 | 1905 | 2467 | 1778 |
| 26.96159 | 1965 | 2469 | 1753 |
| 26.98786 | 1890 | 2464 | 1823 |
| 27.01412 | 1841 | 2444 | 1882 |
| 27.04038 | 1975 | 2461 | 1767 |
| 27.06664 | 2119 | 2507 | 1796 |
| 27.0929  | 1945 | 2463 | 1717 |
| 27.11916 | 1967 | 2386 | 1881 |
| 27.14542 | 1967 | 2485 | 1762 |
| 27.17168 | 1942 | 2377 | 1815 |
| 27.19794 | 1897 | 2443 | 1775 |
| 27.2242  | 1933 | 2416 | 1820 |
| 27.25046 | 1852 | 2392 | 1732 |
| 27.27672 | 1908 | 2513 | 1765 |
| 27.30298 | 1954 | 2411 | 1787 |
| 27.32924 | 1783 | 2437 | 1768 |
| 27.3555  | 1905 | 2375 | 1699 |
| 27.38176 | 1887 | 2465 | 1679 |
| 27.40802 | 1891 | 2385 | 1714 |
| 27.43428 | 1845 | 2419 | 1792 |
| 27.46055 | 1854 | 2405 | 1720 |
| 27.48681 | 1870 | 2391 | 1825 |
| 27.51307 | 1834 | 2418 | 1815 |
| 27.53933 | 1832 | 2382 | 1730 |
| 27.56559 | 1863 | 2445 | 1772 |
| 27.59185 | 1905 | 2446 | 1781 |



|          |      |      |      |
|----------|------|------|------|
| 27.61811 | 1795 | 2525 | 1672 |
| 27.64437 | 1832 | 2529 | 1747 |
| 27.67063 | 1916 | 2565 | 1787 |
| 27.69689 | 1890 | 2506 | 1767 |
| 27.72315 | 1908 | 2493 | 1779 |
| 27.74941 | 1889 | 2391 | 1743 |
| 27.77567 | 2032 | 2513 | 1770 |
| 27.80193 | 1982 | 2471 | 1718 |
| 27.82819 | 2007 | 2538 | 1775 |
| 27.85445 | 1992 | 2495 | 1777 |
| 27.88071 | 2010 | 2463 | 1742 |
| 27.90698 | 1958 | 2583 | 1738 |
| 27.93324 | 1976 | 2557 | 1819 |
| 27.9595  | 1946 | 2601 | 1751 |
| 27.98576 | 1866 | 2558 | 1803 |
| 28.01202 | 1848 | 2497 | 1767 |
| 28.03828 | 1885 | 2514 | 1815 |
| 28.06454 | 1912 | 2516 | 1864 |
| 28.0908  | 1860 | 2468 | 1770 |
| 28.11706 | 1827 | 2564 | 1794 |
| 28.14332 | 1865 | 2538 | 1719 |
| 28.16958 | 1923 | 2463 | 1795 |
| 28.19584 | 1825 | 2468 | 1725 |
| 28.2221  | 1888 | 2481 | 1783 |
| 28.24836 | 1912 | 2394 | 1725 |
| 28.27462 | 1825 | 2628 | 1847 |
| 28.30088 | 1899 | 2454 | 1697 |
| 28.32714 | 1876 | 2574 | 1786 |
| 28.3534  | 1887 | 2458 | 1806 |
| 28.37967 | 1881 | 2521 | 1796 |
| 28.40593 | 1911 | 2571 | 1796 |
| 28.43219 | 1873 | 2459 | 1803 |
| 28.45845 | 1895 | 2524 | 1776 |
| 28.48471 | 1945 | 2486 | 1804 |
| 28.51097 | 1863 | 2485 | 1766 |
| 28.53723 | 1788 | 2587 | 1836 |
| 28.56349 | 1829 | 2497 | 1790 |
| 28.58975 | 1834 | 2550 | 1758 |
| 28.61601 | 1939 | 2550 | 1742 |
| 28.64227 | 1971 | 2506 | 1718 |
| 28.66853 | 1890 | 2453 | 1775 |
| 28.69479 | 1959 | 2394 | 1727 |
| 28.72105 | 1927 | 2396 | 1789 |

|          |      |      |      |
|----------|------|------|------|
| 28.74731 | 1902 | 2395 | 1777 |
| 28.77357 | 1977 | 2364 | 1657 |
| 28.79983 | 1878 | 2392 | 1605 |
| 28.82609 | 1880 | 2439 | 1682 |
| 28.85236 | 1897 | 2376 | 1697 |
| 28.87862 | 1918 | 2407 | 1665 |
| 28.90488 | 1912 | 2332 | 1731 |
| 28.93114 | 1967 | 2302 | 1674 |
| 28.9574  | 1953 | 2269 | 1628 |
| 28.98366 | 1960 | 2337 | 1688 |
| 29.00992 | 1865 | 2287 | 1766 |
| 29.03618 | 1850 | 2360 | 1644 |
| 29.06244 | 1933 | 2294 | 1569 |
| 29.0887  | 1947 | 2320 | 1576 |
| 29.11496 | 1892 | 2177 | 1566 |
| 29.14122 | 1862 | 2171 | 1580 |
| 29.16748 | 1992 | 2257 | 1609 |
| 29.19374 | 1880 | 2190 | 1606 |
| 29.22    | 1821 | 2307 | 1652 |
| 29.24626 | 1928 | 2279 | 1598 |
| 29.27252 | 1940 | 2310 | 1620 |
| 29.29879 | 1879 | 2173 | 1614 |
| 29.32505 | 1815 | 2356 | 1616 |
| 29.35131 | 1893 | 2303 | 1657 |
| 29.37757 | 1885 | 2291 | 1673 |
| 29.40383 | 1890 | 2269 | 1579 |
| 29.43009 | 1750 | 2407 | 1497 |
| 29.45635 | 1872 | 2180 | 1493 |
| 29.48261 | 1927 | 2234 | 1607 |
| 29.50887 | 1881 | 2367 | 1573 |
| 29.53513 | 1825 | 2470 | 1558 |
| 29.56139 | 1849 | 2362 | 1532 |
| 29.58765 | 1807 | 2304 | 1505 |
| 29.61391 | 1911 | 2340 | 1598 |
| 29.64017 | 1885 | 2339 | 1516 |
| 29.66643 | 1739 | 2161 | 1525 |
| 29.69269 | 1864 | 2287 | 1615 |
| 29.71895 | 1768 | 2389 | 1537 |
| 29.74521 | 1842 | 2344 | 1600 |
| 29.77148 | 1805 | 2230 | 1565 |
| 29.79774 | 1882 | 2236 | 1502 |
| 29.824   | 1865 | 2320 | 1544 |
| 29.85026 | 1841 | 2308 | 1534 |

|          |      |      |      |
|----------|------|------|------|
| 29.87652 | 1965 | 2271 | 1633 |
| 29.90278 | 1901 | 2183 | 1562 |
| 29.92904 | 2028 | 2183 | 1506 |
| 29.9553  | 1888 | 2430 | 1681 |
| 29.98156 | 2005 | 2570 | 1593 |
| 30.00782 | 1832 | 2280 | 1536 |
| 30.03408 | 1899 | 2384 | 1593 |
| 30.06034 | 2006 | 2466 | 1627 |
| 30.0866  | 1993 | 2250 | 1577 |
| 30.11286 | 1964 | 2345 | 1591 |
| 30.13912 | 1853 | 2279 | 1568 |
| 30.16538 | 1963 | 2140 | 1582 |
| 30.19164 | 1980 | 2222 | 1578 |
| 30.2179  | 1875 | 2182 | 1514 |
| 30.24417 | 1959 | 2191 | 1568 |
| 30.27043 | 1847 | 2130 | 1574 |
| 30.29669 | 1960 | 2123 | 1496 |
| 30.32295 | 1995 | 2178 | 1533 |
| 30.34921 | 1967 | 2156 | 1478 |
| 30.37547 | 1916 | 2184 | 1544 |
| 30.40173 | 1929 | 2106 | 1524 |
| 30.42799 | 1926 | 2166 | 1564 |
| 30.45425 | 1961 | 2214 | 1511 |
| 30.48051 | 1902 | 2101 | 1486 |
| 30.50677 | 1982 | 2169 | 1540 |
| 30.53303 | 1803 | 2174 | 1507 |
| 30.55929 | 1889 | 2102 | 1511 |
| 30.58555 | 1902 | 2169 | 1553 |
| 30.61181 | 1823 | 2140 | 1484 |
| 30.63807 | 1802 | 2071 | 1479 |
| 30.66433 | 1814 | 2090 | 1519 |
| 30.69059 | 1749 | 2172 | 1483 |
| 30.71686 | 1722 | 2076 | 1499 |
| 30.74312 | 1816 | 2183 | 1433 |
| 30.76938 | 1792 | 2076 | 1493 |
| 30.79564 | 1724 | 2107 | 1496 |
| 30.8219  | 1752 | 2038 | 1398 |
| 30.84816 | 1627 | 2057 | 1446 |
| 30.87442 | 1660 | 2059 | 1463 |
| 30.90068 | 1720 | 2103 | 1417 |
| 30.92694 | 1720 | 2091 | 1535 |
| 30.9532  | 1752 | 2047 | 1487 |
| 30.97946 | 1628 | 2023 | 1443 |

|          |      |      |      |
|----------|------|------|------|
| 31.00572 | 1671 | 2052 | 1526 |
| 31.03198 | 1603 | 1991 | 1458 |
| 31.05824 | 1666 | 2006 | 1407 |
| 31.0845  | 1756 | 2130 | 1396 |
| 31.11076 | 1635 | 2028 | 1419 |
| 31.13702 | 1604 | 2045 | 1432 |
| 31.16329 | 1643 | 2178 | 1395 |
| 31.18955 | 1640 | 1975 | 1419 |
| 31.21581 | 1645 | 1996 | 1425 |
| 31.24207 | 1641 | 2056 | 1428 |
| 31.26833 | 1606 | 2040 | 1440 |
| 31.29459 | 1713 | 1952 | 1432 |
| 31.32085 | 1653 | 2109 | 1431 |
| 31.34711 | 1666 | 2064 | 1470 |
| 31.37337 | 1663 | 2118 | 1406 |
| 31.39963 | 1679 | 2018 | 1355 |
| 31.42589 | 1627 | 2034 | 1428 |
| 31.45215 | 1574 | 2123 | 1357 |
| 31.47841 | 1612 | 2261 | 1395 |
| 31.50467 | 1601 | 2064 | 1354 |
| 31.53093 | 1524 | 2031 | 1367 |
| 31.55719 | 1621 | 2102 | 1436 |
| 31.58345 | 1659 | 2086 | 1297 |
| 31.60971 | 1669 | 1954 | 1382 |
| 31.63598 | 1719 | 2031 | 1384 |
| 31.66224 | 1599 | 1941 | 1294 |
| 31.6885  | 1619 | 2003 | 1455 |
| 31.71476 | 1682 | 2039 | 1409 |
| 31.74102 | 1590 | 1964 | 1365 |
| 31.76728 | 1684 | 2071 | 1332 |
| 31.79354 | 1716 | 2040 | 1321 |
| 31.8198  | 1721 | 1992 | 1411 |
| 31.84606 | 1705 | 2052 | 1478 |
| 31.87232 | 1727 | 1989 | 1400 |
| 31.89858 | 1693 | 2067 | 1387 |
| 31.92484 | 1713 | 1996 | 1403 |
| 31.9511  | 1618 | 2007 | 1438 |
| 31.97736 | 1690 | 2025 | 1427 |
| 32.00362 | 1729 | 2032 | 1376 |
| 32.02988 | 1760 | 2098 | 1365 |
| 32.05614 | 1745 | 1964 | 1424 |
| 32.0824  | 1733 | 2059 | 1431 |
| 32.10867 | 1713 | 2015 | 1405 |

|          |      |      |      |
|----------|------|------|------|
| 32.13493 | 1620 | 2055 | 1387 |
| 32.16119 | 1772 | 2009 | 1381 |
| 32.18745 | 1741 | 2004 | 1456 |
| 32.21371 | 1747 | 1936 | 1456 |
| 32.23997 | 1729 | 2044 | 1368 |
| 32.26623 | 1755 | 2115 | 1456 |
| 32.29249 | 1762 | 2010 | 1398 |
| 32.31875 | 1724 | 2091 | 1432 |
| 32.34501 | 1740 | 2043 | 1422 |
| 32.37127 | 1678 | 2032 | 1444 |
| 32.39753 | 1735 | 2063 | 1436 |
| 32.42379 | 1776 | 1996 | 1451 |
| 32.45005 | 1707 | 2117 | 1429 |
| 32.47631 | 1693 | 2124 | 1400 |
| 32.50257 | 1686 | 2058 | 1444 |
| 32.52883 | 1766 | 2086 | 1444 |
| 32.5551  | 1727 | 2089 | 1413 |
| 32.58136 | 1853 | 2125 | 1370 |
| 32.60762 | 1733 | 2052 | 1395 |
| 32.63388 | 1763 | 2152 | 1408 |
| 32.66014 | 1682 | 2223 | 1523 |
| 32.6864  | 1761 | 2000 | 1480 |
| 32.71266 | 1706 | 2043 | 1470 |
| 32.73892 | 1782 | 2092 | 1539 |
| 32.76518 | 1725 | 2226 | 1428 |
| 32.79144 | 1724 | 2080 | 1439 |
| 32.8177  | 1641 | 2153 | 1535 |
| 32.84396 | 1658 | 2110 | 1472 |
| 32.87022 | 1640 | 2167 | 1423 |
| 32.89648 | 1542 | 2181 | 1455 |
| 32.92274 | 1547 | 2157 | 1593 |
| 32.949   | 1492 | 2129 | 1480 |
| 32.97526 | 1501 | 2051 | 1426 |
| 33.00152 | 1475 | 2166 | 1515 |
| 33.02779 | 1499 | 2156 | 1540 |
| 33.05405 | 1509 | 2241 | 1524 |
| 33.08031 | 1475 | 2080 | 1521 |
| 33.10657 | 1502 | 2191 | 1583 |
| 33.13283 | 1543 | 2136 | 1569 |
| 33.15909 | 1480 | 2262 | 1519 |
| 33.18535 | 1487 | 2111 | 1619 |
| 33.21161 | 1501 | 2190 | 1529 |
| 33.23787 | 1504 | 2093 | 1592 |

|          |      |      |      |
|----------|------|------|------|
| 33.26413 | 1518 | 2338 | 1562 |
| 33.29039 | 1529 | 2146 | 1579 |
| 33.31665 | 1524 | 2283 | 1630 |
| 33.34291 | 1583 | 2301 | 1579 |
| 33.36917 | 1581 | 2235 | 1582 |
| 33.39543 | 1555 | 2335 | 1657 |
| 33.42169 | 1520 | 2257 | 1652 |
| 33.44795 | 1525 | 2399 | 1644 |
| 33.47421 | 1472 | 2312 | 1652 |
| 33.50048 | 1548 | 2331 | 1640 |
| 33.52674 | 1541 | 2330 | 1685 |
| 33.553   | 1548 | 2298 | 1670 |
| 33.57926 | 1540 | 2424 | 1729 |
| 33.60552 | 1551 | 2351 | 1683 |
| 33.63178 | 1545 | 2409 | 1701 |
| 33.65804 | 1644 | 2393 | 1757 |
| 33.6843  | 1613 | 2506 | 1817 |
| 33.71056 | 1491 | 2467 | 1698 |
| 33.73682 | 1577 | 2385 | 1764 |
| 33.76308 | 1633 | 2457 | 1706 |
| 33.78934 | 1604 | 2410 | 1793 |
| 33.8156  | 1633 | 2487 | 1795 |
| 33.84186 | 1543 | 2496 | 1793 |
| 33.86812 | 1606 | 2464 | 1801 |
| 33.89438 | 1587 | 2440 | 1740 |
| 33.92064 | 1702 | 2539 | 1825 |
| 33.94691 | 1579 | 2550 | 1824 |
| 33.97317 | 1626 | 2570 | 1852 |
| 33.99943 | 1577 | 2513 | 1943 |
| 34.02569 | 1643 | 2651 | 1833 |
| 34.05195 | 1643 | 2569 | 1940 |
| 34.07821 | 1662 | 2624 | 1838 |
| 34.10447 | 1620 | 2539 | 1850 |
| 34.13073 | 1714 | 2572 | 1846 |
| 34.15699 | 1629 | 2611 | 1921 |
| 34.18325 | 1744 | 2591 | 1850 |
| 34.20951 | 1699 | 2592 | 1981 |
| 34.23577 | 1692 | 2586 | 1894 |
| 34.26203 | 1715 | 2648 | 1891 |
| 34.28829 | 1697 | 2702 | 1894 |
| 34.31455 | 1803 | 2672 | 1978 |
| 34.34081 | 1731 | 2749 | 1884 |
| 34.36707 | 1765 | 2633 | 1953 |

|          |      |      |      |
|----------|------|------|------|
| 34.39333 | 1809 | 2743 | 1988 |
| 34.4196  | 1752 | 2689 | 2054 |
| 34.44586 | 1852 | 2688 | 2006 |
| 34.47212 | 1789 | 2716 | 1992 |
| 34.49838 | 1739 | 2651 | 1889 |
| 34.52464 | 1738 | 2769 | 1945 |
| 34.5509  | 1833 | 2641 | 1979 |
| 34.57716 | 1708 | 2636 | 2017 |
| 34.60342 | 1858 | 2678 | 1947 |
| 34.62968 | 1782 | 2768 | 1970 |
| 34.65594 | 1809 | 2631 | 2000 |
| 34.6822  | 1816 | 2636 | 1981 |
| 34.70846 | 1719 | 2691 | 1953 |
| 34.73472 | 1741 | 2598 | 1920 |
| 34.76098 | 1807 | 2556 | 1858 |
| 34.78724 | 1826 | 2664 | 1971 |
| 34.8135  | 1874 | 2649 | 1889 |
| 34.83976 | 1833 | 2621 | 1907 |
| 34.86602 | 1868 | 2547 | 1915 |
| 34.89229 | 1863 | 2578 | 1844 |
| 34.91855 | 1909 | 2492 | 1870 |
| 34.94481 | 1849 | 2577 | 1909 |
| 34.97107 | 1825 | 2575 | 1847 |
| 34.99733 | 1960 | 2480 | 1887 |
| 35.02359 | 1857 | 2460 | 1796 |
| 35.04985 | 1852 | 2551 | 1825 |
| 35.07611 | 1862 | 2568 | 1857 |
| 35.10237 | 1889 | 2641 | 1854 |
| 35.12863 | 1863 | 2532 | 1856 |
| 35.15489 | 1836 | 2603 | 1853 |
| 35.18115 | 1840 | 2533 | 1831 |
| 35.20741 | 1790 | 2626 | 1756 |
| 35.23367 | 1910 | 2608 | 1808 |
| 35.25993 | 1885 | 2617 | 1855 |
| 35.28619 | 1817 | 2528 | 1846 |
| 35.31245 | 1844 | 2654 | 1870 |
| 35.33871 | 1828 | 2536 | 1859 |
| 35.36498 | 1909 | 2615 | 1866 |
| 35.39124 | 1792 | 2658 | 1765 |
| 35.4175  | 1820 | 2605 | 1820 |
| 35.44376 | 1894 | 2564 | 1832 |
| 35.47002 | 1808 | 2684 | 1808 |
| 35.49628 | 1852 | 2552 | 1843 |

|          |      |      |      |
|----------|------|------|------|
| 35.52254 | 1886 | 2634 | 1768 |
| 35.5488  | 1872 | 2562 | 1767 |
| 35.57506 | 1884 | 2508 | 1781 |
| 35.60132 | 1971 | 2698 | 1778 |
| 35.62758 | 1890 | 2572 | 1814 |
| 35.65384 | 1877 | 2664 | 1740 |
| 35.6801  | 1918 | 2661 | 1749 |
| 35.70636 | 1892 | 2697 | 1832 |
| 35.73262 | 1782 | 2553 | 1737 |
| 35.75888 | 1910 | 2728 | 1675 |
| 35.78514 | 1875 | 2794 | 1724 |
| 35.81141 | 1891 | 2750 | 1768 |
| 35.83767 | 1840 | 2654 | 1770 |
| 35.86393 | 1796 | 2668 | 1758 |
| 35.89019 | 1750 | 2767 | 1783 |
| 35.91645 | 1891 | 2893 | 1693 |
| 35.94271 | 1918 | 2823 | 1736 |
| 35.96897 | 1866 | 2625 | 1721 |
| 35.99523 | 1931 | 2736 | 1725 |
| 36.02149 | 2032 | 2786 | 1801 |
| 36.04775 | 1903 | 2671 | 1698 |
| 36.07401 | 1957 | 2616 | 1729 |
| 36.10027 | 1993 | 2671 | 1719 |
| 36.12653 | 1941 | 2595 | 1742 |
| 36.15279 | 1874 | 2533 | 1780 |
| 36.17905 | 1857 | 2548 | 1633 |
| 36.20531 | 1924 | 2635 | 1770 |
| 36.23157 | 1870 | 2466 | 1730 |
| 36.25783 | 1952 | 2622 | 1704 |
| 36.2841  | 1947 | 2654 | 1671 |
| 36.31036 | 1892 | 2562 | 1721 |
| 36.33662 | 1950 | 2555 | 1715 |
| 36.36288 | 1862 | 2571 | 1700 |
| 36.38914 | 1920 | 2441 | 1672 |
| 36.4154  | 1928 | 2518 | 1747 |
| 36.44166 | 1994 | 2603 | 1684 |
| 36.46792 | 1922 | 2631 | 1653 |
| 36.49418 | 1925 | 2600 | 1697 |
| 36.52044 | 1933 | 2554 | 1695 |
| 36.5467  | 1913 | 2596 | 1735 |
| 36.57296 | 1951 | 2542 | 1698 |
| 36.59922 | 1827 | 2607 | 1723 |
| 36.62548 | 1917 | 2553 | 1747 |



|          |      |      |      |
|----------|------|------|------|
| 36.65174 | 1961 | 2447 | 1643 |
| 36.678   | 1950 | 2576 | 1673 |
| 36.70426 | 1951 | 2546 | 1727 |
| 36.73052 | 1964 | 2613 | 1688 |
| 36.75679 | 1840 | 2550 | 1642 |
| 36.78305 | 1912 | 2526 | 1687 |
| 36.80931 | 1881 | 2581 | 1683 |
| 36.83557 | 1807 | 2449 | 1744 |
| 36.86183 | 1932 | 2572 | 1637 |
| 36.88809 | 1811 | 2473 | 1649 |
| 36.91435 | 1920 | 2491 | 1695 |
| 36.94061 | 1848 | 2523 | 1650 |
| 36.96687 | 1873 | 2456 | 1675 |
| 36.99313 | 1770 | 2425 | 1680 |
| 37.01939 | 1850 | 2464 | 1606 |
| 37.04565 | 1913 | 2503 | 1621 |
| 37.07191 | 1839 | 2453 | 1682 |
| 37.09817 | 1884 | 2552 | 1687 |
| 37.12443 | 1888 | 2622 | 1607 |
| 37.15069 | 1825 | 2553 | 1628 |
| 37.17695 | 1841 | 2466 | 1658 |
| 37.20322 | 1891 | 2559 | 1702 |
| 37.22948 | 1948 | 2583 | 1670 |
| 37.25574 | 1832 | 2485 | 1693 |
| 37.282   | 1899 | 2353 | 1632 |
| 37.30826 | 2034 | 2478 | 1632 |
| 37.33452 | 1904 | 2436 | 1752 |
| 37.36078 | 1937 | 2529 | 1716 |
| 37.38704 | 1938 | 2506 | 1720 |
| 37.4133  | 1962 | 2506 | 1735 |
| 37.43956 | 1884 | 2571 | 1740 |
| 37.46582 | 1950 | 2531 | 1711 |
| 37.49208 | 1879 | 2547 | 1773 |
| 37.51834 | 1879 | 2649 | 1739 |
| 37.5446  | 1938 | 2599 | 1677 |
| 37.57086 | 1998 | 2577 | 1672 |
| 37.59712 | 1871 | 2639 | 1713 |
| 37.62338 | 1954 | 2555 | 1758 |
| 37.64964 | 1974 | 2543 | 1729 |
| 37.67591 | 2022 | 2541 | 1652 |
| 37.70217 | 1940 | 2453 | 1734 |
| 37.72843 | 1929 | 2539 | 1636 |
| 37.75469 | 2017 | 2536 | 1662 |

|          |      |      |      |
|----------|------|------|------|
| 37.78095 | 2006 | 2604 | 1787 |
| 37.80721 | 1949 | 2602 | 1753 |
| 37.83347 | 2053 | 2636 | 1881 |
| 37.85973 | 1969 | 2537 | 1745 |
| 37.88599 | 1925 | 2585 | 1732 |
| 37.91225 | 1918 | 2827 | 1732 |
| 37.93851 | 1948 | 2832 | 1767 |
| 37.96477 | 2031 | 2871 | 1716 |
| 37.99103 | 1928 | 2697 | 1856 |
| 38.01729 | 1947 | 2796 | 1768 |
| 38.04355 | 2043 | 3007 | 1828 |
| 38.06981 | 2050 | 2842 | 1809 |
| 38.09607 | 2029 | 2622 | 1721 |
| 38.12233 | 1968 | 2685 | 1772 |
| 38.1486  | 1981 | 2838 | 1812 |
| 38.17486 | 1941 | 2657 | 1697 |
| 38.20112 | 2077 | 2671 | 1815 |
| 38.22738 | 2044 | 2579 | 1735 |
| 38.25364 | 2073 | 2552 | 1813 |
| 38.2799  | 2049 | 2653 | 1752 |
| 38.30616 | 2135 | 2794 | 1728 |
| 38.33242 | 2140 | 2566 | 1766 |
| 38.35868 | 2128 | 2587 | 1753 |
| 38.38494 | 2070 | 2526 | 1785 |
| 38.4112  | 2120 | 2556 | 1717 |
| 38.43746 | 2067 | 2539 | 1765 |
| 38.46372 | 2010 | 2456 | 1669 |
| 38.48998 | 2083 | 2499 | 1657 |
| 38.51624 | 2028 | 2527 | 1799 |
| 38.5425  | 2050 | 2562 | 1706 |
| 38.56876 | 2058 | 2475 | 1678 |
| 38.59503 | 2162 | 2507 | 1689 |
| 38.62129 | 2031 | 2464 | 1699 |
| 38.64755 | 2009 | 2526 | 1755 |
| 38.67381 | 1985 | 2566 | 1787 |
| 38.70007 | 2014 | 2507 | 1670 |
| 38.72633 | 2028 | 2524 | 1686 |
| 38.75259 | 2069 | 2587 | 1707 |
| 38.77885 | 2054 | 2487 | 1695 |
| 38.80511 | 1974 | 2508 | 1723 |
| 38.83137 | 1985 | 2600 | 1612 |
| 38.85763 | 2062 | 2501 | 1765 |
| 38.88389 | 1905 | 2561 | 1637 |

|          |      |      |      |
|----------|------|------|------|
| 38.91015 | 1929 | 2565 | 1720 |
| 38.93641 | 2048 | 2510 | 1735 |
| 38.96267 | 1943 | 2514 | 1670 |
| 38.98893 | 2051 | 2590 | 1668 |
| 39.01519 | 1956 | 2539 | 1634 |
| 39.04145 | 1967 | 2535 | 1695 |
| 39.06772 | 1848 | 2581 | 1661 |
| 39.09398 | 1891 | 2589 | 1667 |
| 39.12024 | 1918 | 2562 | 1668 |
| 39.1465  | 1873 | 2485 | 1630 |
| 39.17276 | 1951 | 2479 | 1664 |
| 39.19902 | 1907 | 2492 | 1652 |
| 39.22528 | 1934 | 2601 | 1611 |
| 39.25154 | 1864 | 2658 | 1707 |
| 39.2778  | 1872 | 2571 | 1678 |
| 39.30406 | 1847 | 2581 | 1804 |
| 39.33032 | 1863 | 2609 | 1682 |
| 39.35658 | 1915 | 2663 | 1704 |
| 39.38284 | 1940 | 2595 | 1684 |
| 39.4091  | 1919 | 2603 | 1700 |
| 39.43536 | 1928 | 2598 | 1640 |
| 39.46162 | 1965 | 2551 | 1705 |
| 39.48788 | 1863 | 2658 | 1784 |
| 39.51414 | 1897 | 2639 | 1700 |
| 39.54041 | 1972 | 2538 | 1647 |
| 39.56667 | 1888 | 2591 | 1705 |
| 39.59293 | 2038 | 2735 | 1734 |
| 39.61919 | 1972 | 2669 | 1763 |
| 39.64545 | 1975 | 2597 | 1787 |
| 39.67171 | 1936 | 2643 | 1725 |
| 39.69797 | 2080 | 2693 | 1839 |
| 39.72423 | 1994 | 2760 | 1780 |
| 39.75049 | 1938 | 2786 | 1757 |
| 39.77675 | 2011 | 2773 | 1760 |
| 39.80301 | 2007 | 2989 | 1778 |
| 39.82927 | 1949 | 2867 | 1818 |
| 39.85553 | 1979 | 2816 | 1823 |
| 39.88179 | 1987 | 2788 | 1775 |
| 39.90805 | 1964 | 2791 | 1882 |
| 39.93431 | 2040 | 2662 | 1780 |
| 39.96057 | 2023 | 2774 | 1871 |

|          |      |      |      |
|----------|------|------|------|
| 39.98683 | 2033 | 2735 | 1771 |
|----------|------|------|------|

## 2. Data of TG curves of cellulose organosolv and nanofibrillar cellulose

|             | Nanofibrillar<br>cellulose |                  | Cellulose<br>organosolv |                  |
|-------------|----------------------------|------------------|-------------------------|------------------|
| Temperature | Weight                     | Deriv.<br>Weight | Weight                  | Deriv.<br>Weight |
| °C          | %                          | %/°C             | %                       | %/°C             |
| 65          | 89.49                      | 0.04424          | 94.17                   | 0.05504          |
| 68          | 89.36                      | 0.04424          | 94.01                   | 0.058            |
| 71          | 89.23                      | 0.04324          | 93.81                   | 0.05142          |
| 74          | 89.1                       | 0.0408           | 93.69                   | 0.03984          |
| 77          | 88.99                      | 0.03777          | 93.6                    | 0.03666          |
| 80          | 88.88                      | 0.03563          | 93.48                   | 0.03633          |
| 83          | 88.77                      | 0.03315          | 93.36                   | 0.03376          |
| 86          | 88.67                      | 0.02967          | 93.26                   | 0.031            |
| 89          | 88.59                      | 0.02732          | 93.18                   | 0.0285           |
| 92          | 88.51                      | 0.02461          | 93.1                    | 0.02507          |
| 95          | 88.45                      | 0.02217          | 93.04                   | 0.02226          |
| 98          | 88.37                      | 0.01954          | 92.96                   | 0.02037          |
| 101         | 88.33                      | 0.01694          | 92.91                   | 0.01865          |
| 104         | 88.28                      | 0.01606          | 92.85                   | 0.01327          |
| 107         | 88.23                      | 0.01379          | 92.83                   | 0.01369          |
| 110         | 88.2                       | 0.01129          | 92.76                   | 0.01323          |
| 113         | 88.17                      | 0.009994         | 92.73                   | 0.0123           |
| 116         | 88.13                      | 0.009974         | 92.69                   | 0.007864         |
| 119         | 88.1                       | 0.008543         | 92.7                    | 0.009521         |
| 122         | 88.08                      | 0.008774         | 92.65                   | 0.009411         |
| 125         | 88.06                      | 0.008108         | 92.64                   | 0.006658         |
| 128         | 88.03                      | 0.00621          | 92.62                   | 0.003461         |
| 131         | 88.02                      | 0.004508         | 92.61                   | 0.005586         |
| 134         | 88                         | 0.005148         | 92.57                   | 0.006593         |
| 137         | 87.99                      | 0.005058         | 92.57                   | 0.005191         |
| 140         | 87.97                      | 0.004836         | 92.55                   | 0.002996         |
| 143         | 87.96                      | 0.004519         | 92.55                   | 0.003084         |
| 146         | 87.95                      | 0.004412         | 92.53                   | 0.004267         |
| 149         | 87.93                      | 0.004228         | 92.51                   | 0.003901         |
| 152         | 87.92                      | 0.004279         | 92.51                   | 0.004256         |
| 155         | 87.91                      | 0.004419         | 92.49                   | 0.003722         |
| 158         | 87.89                      | 0.004877         | 92.47                   | 0.002948         |
| 161         | 87.88                      | 0.004505         | 92.49                   | 0.00313          |
| 164         | 87.86                      | 0.005074         | 92.46                   | 0.004341         |
| 167         | 87.85                      | 0.006137         | 92.46                   | 0.002416         |
| 170         | 87.83                      | 0.005413         | 92.45                   | 0.002653         |
| 173         | 87.82                      | 0.004887         | 92.45                   | 0.002003         |

|     |       |          |       |           |
|-----|-------|----------|-------|-----------|
| 176 | 87.79 | 0.005237 | 92.42 | 0.003997  |
| 179 | 87.78 | 0.006634 | 92.43 | 0.001912  |
| 182 | 87.76 | 0.006987 | 92.42 | 0.002033  |
| 185 | 87.74 | 0.007797 | 92.42 | 0.0004304 |
| 188 | 87.72 | 0.007899 | 92.41 | 0.004118  |
| 191 | 87.69 | 0.008081 | 92.39 | 0.003409  |
| 194 | 87.67 | 0.008834 | 92.39 | 0.004979  |
| 197 | 87.64 | 0.01086  | 92.36 | 0.002175  |
| 200 | 87.61 | 0.01259  | 92.38 | 0.002372  |
| 203 | 87.57 | 0.01388  | 92.35 | 0.003092  |
| 206 | 87.52 | 0.01535  | 92.38 | 0.00776   |
| 209 | 87.47 | 0.01756  | 92.3  | 0.006918  |
| 212 | 87.42 | 0.0196   | 92.3  | 0.006063  |
| 215 | 87.36 | 0.02172  | 92.28 | 0.007857  |
| 218 | 87.29 | 0.02345  | 92.25 | 0.009039  |
| 221 | 87.22 | 0.02674  | 92.22 | 0.009578  |
| 224 | 87.13 | 0.02933  | 92.2  | 0.01193   |
| 227 | 87.04 | 0.03167  | 92.15 | 0.01502   |
| 230 | 86.94 | 0.03452  | 92.11 | 0.01711   |
| 233 | 86.83 | 0.03819  | 92.05 | 0.01943   |
| 236 | 86.71 | 0.042    | 91.99 | 0.02276   |
| 239 | 86.58 | 0.04558  | 91.92 | 0.02713   |
| 242 | 86.43 | 0.0476   | 91.84 | 0.03331   |
| 245 | 86.3  | 0.05116  | 91.71 | 0.03702   |
| 248 | 86.13 | 0.05555  | 91.6  | 0.04076   |
| 251 | 85.96 | 0.0591   | 91.48 | 0.04606   |
| 254 | 85.78 | 0.06437  | 91.33 | 0.05242   |
| 257 | 85.57 | 0.07198  | 91.17 | 0.06159   |
| 260 | 85.34 | 0.07864  | 90.94 | 0.06891   |
| 263 | 85.09 | 0.08597  | 90.76 | 0.07482   |
| 266 | 84.83 | 0.09542  | 90.5  | 0.08598   |
| 269 | 84.53 | 0.107    | 90.24 | 0.09403   |
| 272 | 84.19 | 0.1184   | 89.95 | 0.1044    |
| 275 | 83.81 | 0.1309   | 89.62 | 0.1137    |
| 278 | 83.41 | 0.1461   | 89.25 | 0.1258    |
| 281 | 82.95 | 0.1657   | 88.86 | 0.1322    |
| 284 | 82.42 | 0.1855   | 88.46 | 0.1424    |
| 287 | 81.83 | 0.2083   | 88    | 0.1527    |
| 290 | 81.17 | 0.2332   | 87.55 | 0.1627    |
| 293 | 80.43 | 0.2615   | 87.02 | 0.1727    |
| 296 | 79.6  | 0.2928   | 86.51 | 0.1817    |
| 299 | 78.68 | 0.3278   | 85.93 | 0.1921    |
| 302 | 77.64 | 0.362    | 85.36 | 0.2023    |

|     |       |         |       |         |
|-----|-------|---------|-------|---------|
| 305 | 76.51 | 0.3956  | 84.73 | 0.2114  |
| 308 | 75.26 | 0.4343  | 84.09 | 0.2192  |
| 311 | 73.9  | 0.4764  | 83.41 | 0.2298  |
| 314 | 72.41 | 0.5211  | 82.71 | 0.2416  |
| 317 | 70.78 | 0.5682  | 81.97 | 0.2533  |
| 320 | 69    | 0.6244  | 81.18 | 0.2673  |
| 323 | 67.04 | 0.688   | 80.37 | 0.2829  |
| 326 | 64.88 | 0.7599  | 79.48 | 0.2985  |
| 329 | 62.49 | 0.8398  | 78.59 | 0.321   |
| 332 | 59.85 | 0.9297  | 77.57 | 0.3511  |
| 335 | 56.92 | 1.027   | 76.48 | 0.3821  |
| 338 | 53.69 | 1.128   | 75.28 | 0.42    |
| 341 | 50.15 | 1.228   | 73.97 | 0.4701  |
| 344 | 46.31 | 1.32    | 72.46 | 0.5258  |
| 347 | 42.21 | 1.389   | 70.81 | 0.595   |
| 350 | 37.95 | 1.409   | 68.91 | 0.6794  |
| 353 | 33.7  | 1.34    | 66.75 | 0.7779  |
| 356 | 29.79 | 1.157   | 64.27 | 0.8913  |
| 359 | 26.67 | 0.8608  | 61.42 | 1.012   |
| 362 | 24.59 | 0.5502  | 58.19 | 1.147   |
| 365 | 23.41 | 0.3215  | 54.51 | 1.301   |
| 368 | 22.77 | 0.1863  | 50.38 | 1.471   |
| 371 | 22.34 | 0.1228  | 45.73 | 1.619   |
| 374 | 22.05 | 0.09625 | 40.61 | 1.736   |
| 377 | 21.78 | 0.08472 | 35.28 | 1.812   |
| 380 | 21.55 | 0.08006 | 29.72 | 1.812   |
| 383 | 21.3  | 0.07627 | 24.27 | 1.632   |
| 386 | 21.09 | 0.07302 | 19.69 | 1.243   |
| 389 | 20.87 | 0.07128 | 16.66 | 0.776   |
| 392 | 20.66 | 0.06904 | 15.16 | 0.3882  |
| 395 | 20.47 | 0.06705 | 14.52 | 0.1847  |
| 398 | 20.25 | 0.06824 | 14.16 | 0.1049  |
| 401 | 20.04 | 0.06843 | 13.91 | 0.07621 |
| 404 | 19.85 | 0.06827 | 13.7  | 0.06496 |
| 407 | 19.64 | 0.06826 | 13.52 | 0.05624 |
| 410 | 19.44 | 0.06867 | 13.37 | 0.05238 |
| 413 | 19.23 | 0.07037 | 13.21 | 0.04939 |
| 416 | 19    | 0.06888 | 13.06 | 0.04813 |
| 419 | 18.82 | 0.06611 | 12.92 | 0.04462 |
| 422 | 18.62 | 0.07245 | 12.79 | 0.04326 |
| 425 | 18.4  | 0.0818  | 12.67 | 0.04251 |
| 428 | 18.11 | 0.08249 | 12.55 | 0.04218 |
| 431 | 17.9  | 0.07559 | 12.43 | 0.04056 |

|     |       |         |       |         |
|-----|-------|---------|-------|---------|
| 434 | 17.66 | 0.07412 | 12.29 | 0.0394  |
| 437 | 17.45 | 0.07234 | 12.18 | 0.03917 |
| 440 | 17.23 | 0.07342 | 12.07 | 0.03926 |
| 443 | 17.01 | 0.07474 | 11.96 | 0.03583 |
| 446 | 16.79 | 0.07623 | 11.86 | 0.03563 |
| 449 | 16.55 | 0.07555 | 11.74 | 0.04214 |
| 452 | 16.33 | 0.07784 | 11.61 | 0.04094 |
| 455 | 16.09 | 0.08192 | 11.44 | 0.03816 |
| 458 | 15.84 | 0.0837  | 11.34 | 0.03392 |
| 461 | 15.58 | 0.08464 | 11.27 | 0.04119 |
| 464 | 15.33 | 0.08718 | 11.15 | 0.04319 |
| 467 | 15.06 | 0.09005 | 11.02 | 0.04505 |
| 470 | 14.78 | 0.09188 | 10.85 | 0.03698 |
| 473 | 14.51 | 0.09569 | 10.8  | 0.03431 |
| 476 | 14.22 | 0.1018  | 10.66 | 0.04112 |
| 479 | 13.9  | 0.1056  | 10.52 | 0.04554 |
| 482 | 13.58 | 0.1065  | 10.38 | 0.04448 |
| 485 | 13.26 | 0.1115  | 10.27 | 0.04393 |
| 488 | 12.91 | 0.1162  | 10.12 | 0.04968 |
| 491 | 12.56 | 0.1212  | 9.99  | 0.04812 |
| 494 | 12.19 | 0.1243  | 9.841 | 0.05518 |
| 497 | 11.82 | 0.1282  | 9.659 | 0.05391 |
| 500 | 11.43 | 0.1364  | 9.496 | 0.05493 |
| 503 | 10.99 | 0.148   | 9.345 | 0.05962 |
| 506 | 10.54 | 0.1563  | 9.104 | 0.06184 |
| 509 | 10.07 | 0.1656  | 8.998 | 0.0669  |
| 512 | 9.544 | 0.1749  | 8.741 | 0.07622 |
| 515 | 8.999 | 0.1844  | 8.506 | 0.08195 |
| 518 | 8.435 | 0.1937  | 8.258 | 0.08567 |
| 521 | 7.836 | 0.2017  | 7.997 | 0.09427 |
| 524 | 7.232 | 0.205   | 7.704 | 0.1002  |
| 527 | 6.603 | 0.204   | 7.374 | 0.1012  |
| 530 | 5.996 | 0.1998  | 7.068 | 0.11    |
| 533 | 5.413 | 0.1978  | 6.691 | 0.1163  |
| 536 | 4.822 | 0.1961  | 6.396 | 0.1263  |
| 539 | 4.229 | 0.1901  | 5.968 | 0.1343  |
| 542 | 3.67  | 0.1816  | 5.58  | 0.1384  |
| 545 | 3.137 | 0.1717  | 5.156 | 0.1395  |
| 548 | 2.637 | 0.1578  | 4.728 | 0.1407  |
| 551 | 2.191 | 0.142   | 4.315 | 0.1428  |
| 554 | 1.79  | 0.1232  | 3.853 | 0.1414  |
| 557 | 1.45  | 0.1016  | 3.494 | 0.1398  |
| 560 | 1.179 | 0.07913 | 3.037 | 0.1439  |



|     |        |         |         |        |
|-----|--------|---------|---------|--------|
| 563 | 0.9738 | 0.06053 | 2.609   | 0.1475 |
| 566 | 0.8161 | 0.04432 | 2.139   | 0.1415 |
| 569 | 0.7085 | 0.03365 | 1.755   | 0.1342 |
| 572 | 0.6317 | 0.03161 | 1.387   | 0.1397 |
| 575 | 0.5173 | 0.02944 | 0.9087  | 0.1462 |
| 578 | 0.4475 | 0.02644 | 0.4984  | 0.1341 |
| 581 | 0.3723 | 0.02686 | 0.06407 | 0.1307 |
| 584 | 0.292  | 0.0265  | 0.3119  | 0.1284 |
| 587 | 0.2009 | 0.02304 | 0.6276  | 0.1343 |
| 590 | 0.1417 | 0.01953 | 1.113   | 0.1348 |
| 593 | 0.0851 | 0.01982 |         |        |

3. Data of FTIR spectra: (A) agave bagasse fibers, (B) cellulose obtained by the organosolv method

| Wavenumbers<br>[1/cm] | Agave<br>bagasse | Cellulose<br>Organosolve | Nanofibrillar<br>cellulose |
|-----------------------|------------------|--------------------------|----------------------------|
| 4000                  | 0.98497          | 0.98572                  | 0.99144                    |
| 3999                  | 0.98497          | 0.98582                  | 0.99168                    |
| 3998                  | 0.98496          | 0.98591                  | 0.99193                    |
| 3997                  | 0.98495          | 0.98593                  | 0.99211                    |
| 3996                  | 0.98494          | 0.98589                  | 0.99223                    |
| 3995                  | 0.98494          | 0.98582                  | 0.99229                    |
| 3994                  | 0.98493          | 0.98573                  | 0.99222                    |
| 3993                  | 0.98493          | 0.98565                  | 0.99202                    |
| 3992                  | 0.98492          | 0.98562                  | 0.99182                    |
| 3991                  | 0.98492          | 0.98566                  | 0.99173                    |
| 3990                  | 0.98492          | 0.98572                  | 0.99171                    |
| 3989                  | 0.98492          | 0.98574                  | 0.99169                    |
| 3988                  | 0.98492          | 0.9857                   | 0.99168                    |
| 3987                  | 0.98491          | 0.98564                  | 0.99175                    |
| 3986                  | 0.98491          | 0.98563                  | 0.99185                    |
| 3985                  | 0.98491          | 0.98569                  | 0.99192                    |
| 3984                  | 0.98492          | 0.98577                  | 0.99194                    |
| 3983                  | 0.98492          | 0.98579                  | 0.99194                    |
| 3982                  | 0.98492          | 0.98576                  | 0.99196                    |
| 3981                  | 0.98492          | 0.98569                  | 0.99199                    |
| 3980                  | 0.98493          | 0.98559                  | 0.992                      |
| 3979                  | 0.98493          | 0.98546                  | 0.992                      |
| 3978                  | 0.98493          | 0.98531                  | 0.992                      |
| 3977                  | 0.98494          | 0.98522                  | 0.99199                    |
| 3976                  | 0.98495          | 0.98529                  | 0.9919                     |
| 3975                  | 0.98495          | 0.98548                  | 0.99173                    |
| 3974                  | 0.98497          | 0.98568                  | 0.99156                    |
| 3973                  | 0.98499          | 0.98576                  | 0.99145                    |
| 3972                  | 0.98501          | 0.98576                  | 0.99142                    |
| 3971                  | 0.98503          | 0.98574                  | 0.99148                    |
| 3970                  | 0.98505          | 0.98576                  | 0.99161                    |
| 3969                  | 0.98506          | 0.98579                  | 0.99168                    |
| 3968                  | 0.98507          | 0.98575                  | 0.99166                    |
| 3967                  | 0.98508          | 0.98564                  | 0.99161                    |
| 3966                  | 0.98508          | 0.98549                  | 0.9916                     |
| 3965                  | 0.98508          | 0.98536                  | 0.99162                    |
| 3964                  | 0.98507          | 0.9853                   | 0.99157                    |

|      |         |         |         |
|------|---------|---------|---------|
| 3963 | 0.98508 | 0.98532 | 0.99146 |
| 3962 | 0.98509 | 0.98539 | 0.99133 |
| 3961 | 0.98511 | 0.98542 | 0.99125 |
| 3960 | 0.98514 | 0.9854  | 0.99124 |
| 3959 | 0.98515 | 0.98536 | 0.99134 |
| 3958 | 0.98516 | 0.98537 | 0.99154 |
| 3957 | 0.98516 | 0.98544 | 0.99177 |
| 3956 | 0.98516 | 0.98553 | 0.99193 |
| 3955 | 0.98516 | 0.98559 | 0.99198 |
| 3954 | 0.98517 | 0.98561 | 0.99198 |
| 3953 | 0.98517 | 0.98562 | 0.99204 |
| 3952 | 0.98518 | 0.9856  | 0.99208 |
| 3951 | 0.98518 | 0.98552 | 0.99199 |
| 3950 | 0.98517 | 0.9854  | 0.99176 |
| 3949 | 0.98517 | 0.98532 | 0.99155 |
| 3948 | 0.98517 | 0.98535 | 0.9915  |
| 3947 | 0.98517 | 0.98543 | 0.99157 |
| 3946 | 0.98517 | 0.98547 | 0.99168 |
| 3945 | 0.98518 | 0.98553 | 0.99188 |
| 3944 | 0.9852  | 0.98559 | 0.99218 |
| 3943 | 0.98521 | 0.98554 | 0.99239 |
| 3942 | 0.98522 | 0.98537 | 0.99233 |
| 3941 | 0.98522 | 0.98523 | 0.99208 |
| 3940 | 0.98523 | 0.98524 | 0.99185 |
| 3939 | 0.98524 | 0.98538 | 0.9918  |
| 3938 | 0.98525 | 0.98552 | 0.9919  |
| 3937 | 0.98527 | 0.98547 | 0.99196 |
| 3936 | 0.98528 | 0.98523 | 0.9919  |
| 3935 | 0.98529 | 0.98491 | 0.99176 |
| 3934 | 0.9853  | 0.98473 | 0.99161 |
| 3933 | 0.98531 | 0.98477 | 0.99153 |
| 3932 | 0.98531 | 0.985   | 0.99153 |
| 3931 | 0.98531 | 0.98531 | 0.99161 |
| 3930 | 0.9853  | 0.98565 | 0.99181 |
| 3929 | 0.98529 | 0.98586 | 0.99202 |
| 3928 | 0.98529 | 0.98592 | 0.9921  |
| 3927 | 0.9853  | 0.986   | 0.99216 |
| 3926 | 0.98531 | 0.98617 | 0.99239 |
| 3925 | 0.98533 | 0.98621 | 0.9926  |
| 3924 | 0.98534 | 0.98598 | 0.99254 |
| 3923 | 0.98534 | 0.98569 | 0.9923  |
| 3922 | 0.98535 | 0.98541 | 0.99206 |
| 3921 | 0.98536 | 0.9851  | 0.99188 |

|      |         |         |         |
|------|---------|---------|---------|
| 3920 | 0.98538 | 0.98486 | 0.99175 |
| 3919 | 0.98539 | 0.98483 | 0.99173 |
| 3918 | 0.98539 | 0.98497 | 0.99176 |
| 3917 | 0.98539 | 0.98516 | 0.99178 |
| 3916 | 0.98538 | 0.98534 | 0.9918  |
| 3915 | 0.98537 | 0.9855  | 0.99181 |
| 3914 | 0.98536 | 0.98556 | 0.99175 |
| 3913 | 0.98535 | 0.98556 | 0.99168 |
| 3912 | 0.98533 | 0.98553 | 0.99168 |
| 3911 | 0.98531 | 0.98543 | 0.99166 |
| 3910 | 0.98528 | 0.9853  | 0.99162 |
| 3909 | 0.98526 | 0.98528 | 0.99172 |
| 3908 | 0.98524 | 0.98527 | 0.99192 |
| 3907 | 0.98523 | 0.98503 | 0.99197 |
| 3906 | 0.98522 | 0.98476 | 0.99199 |
| 3905 | 0.98522 | 0.98464 | 0.99223 |
| 3904 | 0.98522 | 0.98442 | 0.99235 |
| 3903 | 0.98523 | 0.98404 | 0.99218 |
| 3902 | 0.98523 | 0.98382 | 0.99212 |
| 3901 | 0.98523 | 0.98403 | 0.99235 |
| 3900 | 0.98523 | 0.98451 | 0.9925  |
| 3899 | 0.98522 | 0.9849  | 0.99222 |
| 3898 | 0.98522 | 0.98517 | 0.99176 |
| 3897 | 0.98522 | 0.98538 | 0.99145 |
| 3896 | 0.98522 | 0.98535 | 0.99123 |
| 3895 | 0.98522 | 0.98506 | 0.99104 |
| 3894 | 0.98521 | 0.98498 | 0.99128 |
| 3893 | 0.98521 | 0.98529 | 0.99206 |
| 3892 | 0.98521 | 0.98533 | 0.99258 |
| 3891 | 0.98522 | 0.98495 | 0.99247 |
| 3890 | 0.98523 | 0.98461 | 0.99234 |
| 3889 | 0.98525 | 0.98449 | 0.99248 |
| 3888 | 0.98526 | 0.98454 | 0.99265 |
| 3887 | 0.98526 | 0.98469 | 0.99267 |
| 3886 | 0.98527 | 0.98475 | 0.99252 |
| 3885 | 0.98529 | 0.98463 | 0.99228 |
| 3884 | 0.9853  | 0.98447 | 0.99202 |
| 3883 | 0.98531 | 0.98454 | 0.99187 |
| 3882 | 0.98532 | 0.98494 | 0.99187 |
| 3881 | 0.98533 | 0.98541 | 0.99189 |
| 3880 | 0.98533 | 0.98559 | 0.99178 |
| 3879 | 0.98535 | 0.98539 | 0.99163 |
| 3878 | 0.98539 | 0.98504 | 0.99158 |

|      |         |         |         |
|------|---------|---------|---------|
| 3877 | 0.98544 | 0.98492 | 0.99168 |
| 3876 | 0.98547 | 0.98514 | 0.99192 |
| 3875 | 0.9855  | 0.98524 | 0.99208 |
| 3874 | 0.98553 | 0.98486 | 0.99205 |
| 3873 | 0.98555 | 0.98436 | 0.99199 |
| 3872 | 0.98556 | 0.98432 | 0.9922  |
| 3871 | 0.98556 | 0.98456 | 0.99255 |
| 3870 | 0.98555 | 0.98464 | 0.99272 |
| 3869 | 0.98552 | 0.9847  | 0.99285 |
| 3868 | 0.98549 | 0.98467 | 0.99286 |
| 3867 | 0.98545 | 0.98445 | 0.99255 |
| 3866 | 0.98539 | 0.98439 | 0.99223 |
| 3865 | 0.98533 | 0.98459 | 0.99209 |
| 3864 | 0.98527 | 0.9847  | 0.99182 |
| 3863 | 0.98523 | 0.98481 | 0.99162 |
| 3862 | 0.9852  | 0.98491 | 0.99174 |
| 3861 | 0.98519 | 0.98464 | 0.99173 |
| 3860 | 0.9852  | 0.98421 | 0.99151 |
| 3859 | 0.98522 | 0.98416 | 0.99174 |
| 3858 | 0.98525 | 0.98432 | 0.9924  |
| 3857 | 0.98527 | 0.98391 | 0.9925  |
| 3856 | 0.9853  | 0.98326 | 0.99186 |
| 3855 | 0.98533 | 0.98369 | 0.99188 |
| 3854 | 0.98535 | 0.98376 | 0.99187 |
| 3853 | 0.98537 | 0.9829  | 0.99069 |
| 3852 | 0.98538 | 0.98318 | 0.99015 |
| 3851 | 0.98539 | 0.98415 | 0.9905  |
| 3850 | 0.98539 | 0.9847  | 0.99077 |
| 3849 | 0.98542 | 0.98482 | 0.99097 |
| 3848 | 0.98545 | 0.98477 | 0.99118 |
| 3847 | 0.98549 | 0.98462 | 0.9913  |
| 3846 | 0.98552 | 0.98441 | 0.99126 |
| 3845 | 0.98555 | 0.98434 | 0.99137 |
| 3844 | 0.98559 | 0.9844  | 0.99171 |
| 3843 | 0.98564 | 0.98437 | 0.99191 |
| 3842 | 0.98567 | 0.98416 | 0.99168 |
| 3841 | 0.9857  | 0.98409 | 0.99141 |
| 3840 | 0.98572 | 0.98434 | 0.9917  |
| 3839 | 0.98573 | 0.98454 | 0.99238 |
| 3838 | 0.98575 | 0.98459 | 0.99292 |
| 3837 | 0.98576 | 0.98475 | 0.99333 |
| 3836 | 0.98577 | 0.98494 | 0.99359 |
| 3835 | 0.98578 | 0.98507 | 0.99361 |

|      |         |         |         |
|------|---------|---------|---------|
| 3834 | 0.98578 | 0.98521 | 0.99349 |
| 3833 | 0.98577 | 0.98536 | 0.9933  |
| 3832 | 0.98576 | 0.98543 | 0.993   |
| 3831 | 0.98576 | 0.98539 | 0.99266 |
| 3830 | 0.98576 | 0.98535 | 0.99248 |
| 3829 | 0.98578 | 0.98537 | 0.9925  |
| 3828 | 0.9858  | 0.9854  | 0.99253 |
| 3827 | 0.98579 | 0.98539 | 0.99248 |
| 3826 | 0.98578 | 0.98536 | 0.99254 |
| 3825 | 0.98577 | 0.9851  | 0.99262 |
| 3824 | 0.98575 | 0.9844  | 0.99242 |
| 3823 | 0.98573 | 0.98397 | 0.99228 |
| 3822 | 0.98571 | 0.98423 | 0.99263 |
| 3821 | 0.98569 | 0.98439 | 0.99278 |
| 3820 | 0.98566 | 0.98435 | 0.99236 |
| 3819 | 0.98564 | 0.98449 | 0.99195 |
| 3818 | 0.98562 | 0.98497 | 0.99196 |
| 3817 | 0.9856  | 0.98543 | 0.99222 |
| 3816 | 0.98558 | 0.98548 | 0.99217 |
| 3815 | 0.98558 | 0.98538 | 0.99195 |
| 3814 | 0.9856  | 0.98543 | 0.99189 |
| 3813 | 0.98563 | 0.98557 | 0.99203 |
| 3812 | 0.98566 | 0.98557 | 0.99229 |
| 3811 | 0.98568 | 0.98536 | 0.99255 |
| 3810 | 0.98571 | 0.98505 | 0.99269 |
| 3809 | 0.98572 | 0.98484 | 0.99272 |
| 3808 | 0.98574 | 0.98471 | 0.99272 |
| 3807 | 0.98575 | 0.98458 | 0.99271 |
| 3806 | 0.98576 | 0.98447 | 0.99258 |
| 3805 | 0.98576 | 0.98409 | 0.99204 |
| 3804 | 0.98577 | 0.98359 | 0.99127 |
| 3803 | 0.98579 | 0.98391 | 0.99127 |
| 3802 | 0.9858  | 0.98475 | 0.99199 |
| 3801 | 0.98581 | 0.98526 | 0.99233 |
| 3800 | 0.98583 | 0.98553 | 0.99223 |
| 3799 | 0.98584 | 0.98576 | 0.9922  |
| 3798 | 0.98585 | 0.98599 | 0.99244 |
| 3797 | 0.98584 | 0.98602 | 0.99271 |
| 3796 | 0.98583 | 0.98589 | 0.99281 |
| 3795 | 0.98582 | 0.98584 | 0.99284 |
| 3794 | 0.9858  | 0.98596 | 0.99284 |
| 3793 | 0.98577 | 0.98614 | 0.99278 |
| 3792 | 0.98574 | 0.98627 | 0.99267 |

|      |         |         |         |
|------|---------|---------|---------|
| 3791 | 0.98572 | 0.98636 | 0.99259 |
| 3790 | 0.98569 | 0.98637 | 0.99252 |
| 3789 | 0.98567 | 0.98633 | 0.99243 |
| 3788 | 0.98565 | 0.98628 | 0.99242 |
| 3787 | 0.98562 | 0.98629 | 0.99261 |
| 3786 | 0.98559 | 0.98628 | 0.99294 |
| 3785 | 0.98555 | 0.9862  | 0.99324 |
| 3784 | 0.98552 | 0.98611 | 0.99341 |
| 3783 | 0.9855  | 0.98604 | 0.9934  |
| 3782 | 0.9855  | 0.98598 | 0.99319 |
| 3781 | 0.9855  | 0.98601 | 0.99294 |
| 3780 | 0.98551 | 0.98603 | 0.99274 |
| 3779 | 0.98551 | 0.98598 | 0.99257 |
| 3778 | 0.98552 | 0.98602 | 0.9925  |
| 3777 | 0.98552 | 0.98612 | 0.99252 |
| 3776 | 0.98553 | 0.98619 | 0.99256 |
| 3775 | 0.98555 | 0.98621 | 0.99266 |
| 3774 | 0.98555 | 0.98617 | 0.99279 |
| 3773 | 0.98554 | 0.98611 | 0.99283 |
| 3772 | 0.98554 | 0.98615 | 0.99284 |
| 3771 | 0.98554 | 0.98615 | 0.99281 |
| 3770 | 0.98555 | 0.98588 | 0.99264 |
| 3769 | 0.98555 | 0.98555 | 0.9924  |
| 3768 | 0.98556 | 0.9854  | 0.99226 |
| 3767 | 0.98556 | 0.9854  | 0.99215 |
| 3766 | 0.98556 | 0.98539 | 0.99201 |
| 3765 | 0.98555 | 0.98546 | 0.99198 |
| 3764 | 0.98555 | 0.98563 | 0.99217 |
| 3763 | 0.98557 | 0.98564 | 0.99234 |
| 3762 | 0.98557 | 0.98542 | 0.99229 |
| 3761 | 0.98556 | 0.98533 | 0.99222 |
| 3760 | 0.98554 | 0.98549 | 0.99227 |
| 3759 | 0.9855  | 0.98553 | 0.99222 |
| 3758 | 0.98544 | 0.98531 | 0.99204 |
| 3757 | 0.98537 | 0.98508 | 0.9921  |
| 3756 | 0.98529 | 0.98491 | 0.99249 |
| 3755 | 0.98521 | 0.98449 | 0.99272 |
| 3754 | 0.98513 | 0.98367 | 0.99253 |
| 3753 | 0.98505 | 0.9831  | 0.99256 |
| 3752 | 0.98497 | 0.98321 | 0.99382 |
| 3751 | 0.98489 | 0.98273 | 0.9948  |
| 3750 | 0.9848  | 0.98221 | 0.9944  |
| 3749 | 0.98472 | 0.98245 | 0.99381 |

|      |         |         |         |
|------|---------|---------|---------|
| 3748 | 0.98463 | 0.98253 | 0.99322 |
| 3747 | 0.98453 | 0.98244 | 0.99263 |
| 3746 | 0.98444 | 0.98282 | 0.99238 |
| 3745 | 0.98434 | 0.98328 | 0.99204 |
| 3744 | 0.98426 | 0.98339 | 0.99136 |
| 3743 | 0.98419 | 0.98328 | 0.99061 |
| 3742 | 0.98413 | 0.9832  | 0.99004 |
| 3741 | 0.98408 | 0.98325 | 0.98991 |
| 3740 | 0.98403 | 0.98313 | 0.99012 |
| 3739 | 0.98399 | 0.98259 | 0.99017 |
| 3738 | 0.98396 | 0.9821  | 0.98991 |
| 3737 | 0.98395 | 0.98225 | 0.98977 |
| 3736 | 0.98394 | 0.98248 | 0.98961 |
| 3735 | 0.98393 | 0.98226 | 0.98908 |
| 3734 | 0.98393 | 0.98219 | 0.98884 |
| 3733 | 0.98394 | 0.98263 | 0.98934 |
| 3732 | 0.98394 | 0.98329 | 0.99008 |
| 3731 | 0.98393 | 0.98382 | 0.99053 |
| 3730 | 0.98393 | 0.98407 | 0.99056 |
| 3729 | 0.98393 | 0.98416 | 0.99042 |
| 3728 | 0.98394 | 0.98427 | 0.99039 |
| 3727 | 0.98396 | 0.98433 | 0.99053 |
| 3726 | 0.984   | 0.98422 | 0.99065 |
| 3725 | 0.98403 | 0.98403 | 0.99074 |
| 3724 | 0.98408 | 0.98398 | 0.99105 |
| 3723 | 0.98414 | 0.98413 | 0.99154 |
| 3722 | 0.98421 | 0.98431 | 0.99174 |
| 3721 | 0.98428 | 0.98448 | 0.99151 |
| 3720 | 0.98436 | 0.98475 | 0.99128 |
| 3719 | 0.98443 | 0.98502 | 0.99129 |
| 3718 | 0.98451 | 0.98489 | 0.99125 |
| 3717 | 0.98459 | 0.98447 | 0.99128 |
| 3716 | 0.98465 | 0.98427 | 0.99187 |
| 3715 | 0.9847  | 0.98426 | 0.99253 |
| 3714 | 0.98475 | 0.9841  | 0.99199 |
| 3713 | 0.98478 | 0.98425 | 0.99057 |
| 3712 | 0.9848  | 0.98474 | 0.98968 |
| 3711 | 0.9848  | 0.9849  | 0.98946 |
| 3710 | 0.98481 | 0.98499 | 0.9899  |
| 3709 | 0.98481 | 0.98499 | 0.99067 |
| 3708 | 0.98483 | 0.9848  | 0.9911  |
| 3707 | 0.98485 | 0.98471 | 0.99123 |
| 3706 | 0.98488 | 0.98474 | 0.99129 |



|      |         |         |         |
|------|---------|---------|---------|
| 3705 | 0.98492 | 0.98482 | 0.99138 |
| 3704 | 0.98495 | 0.98507 | 0.99155 |
| 3703 | 0.98498 | 0.98552 | 0.9918  |
| 3702 | 0.985   | 0.98582 | 0.9919  |
| 3701 | 0.985   | 0.98576 | 0.99167 |
| 3700 | 0.98499 | 0.98547 | 0.99126 |
| 3699 | 0.98499 | 0.98522 | 0.99098 |
| 3698 | 0.98501 | 0.98518 | 0.99102 |
| 3697 | 0.98504 | 0.98513 | 0.99117 |
| 3696 | 0.98508 | 0.98499 | 0.99121 |
| 3695 | 0.98512 | 0.98509 | 0.99139 |
| 3694 | 0.98517 | 0.98538 | 0.99168 |
| 3693 | 0.98522 | 0.98524 | 0.99163 |
| 3692 | 0.98526 | 0.98497 | 0.99163 |
| 3691 | 0.9853  | 0.98537 | 0.9927  |
| 3690 | 0.98533 | 0.98551 | 0.99369 |
| 3689 | 0.98535 | 0.98517 | 0.9933  |
| 3688 | 0.98537 | 0.98515 | 0.99243 |
| 3687 | 0.98536 | 0.98527 | 0.99165 |
| 3686 | 0.98534 | 0.98533 | 0.99111 |
| 3685 | 0.98531 | 0.98532 | 0.99094 |
| 3684 | 0.98529 | 0.98514 | 0.99089 |
| 3683 | 0.98526 | 0.98479 | 0.99071 |
| 3682 | 0.98523 | 0.98454 | 0.99056 |
| 3681 | 0.9852  | 0.98451 | 0.99069 |
| 3680 | 0.98519 | 0.98422 | 0.99085 |
| 3679 | 0.98518 | 0.98341 | 0.99077 |
| 3678 | 0.98517 | 0.98286 | 0.99102 |
| 3677 | 0.98518 | 0.98333 | 0.99218 |
| 3676 | 0.98519 | 0.98381 | 0.99315 |
| 3675 | 0.98519 | 0.98397 | 0.99315 |
| 3674 | 0.98518 | 0.9841  | 0.99244 |
| 3673 | 0.98515 | 0.98408 | 0.99131 |
| 3672 | 0.98508 | 0.98444 | 0.9908  |
| 3671 | 0.98501 | 0.98509 | 0.99127 |
| 3670 | 0.98492 | 0.98493 | 0.99128 |
| 3669 | 0.98484 | 0.98452 | 0.99076 |
| 3668 | 0.98475 | 0.9845  | 0.99049 |
| 3667 | 0.98466 | 0.98461 | 0.99037 |
| 3666 | 0.98456 | 0.98472 | 0.99024 |
| 3665 | 0.98447 | 0.98486 | 0.99014 |
| 3664 | 0.98438 | 0.98498 | 0.99006 |
| 3663 | 0.98429 | 0.98497 | 0.99004 |

|      |         |         |         |
|------|---------|---------|---------|
| 3662 | 0.98421 | 0.98492 | 0.99025 |
| 3661 | 0.98412 | 0.98477 | 0.99058 |
| 3660 | 0.98403 | 0.9844  | 0.99069 |
| 3659 | 0.98394 | 0.98399 | 0.99065 |
| 3658 | 0.98386 | 0.98387 | 0.9908  |
| 3657 | 0.98376 | 0.98367 | 0.99085 |
| 3656 | 0.98367 | 0.98302 | 0.99039 |
| 3655 | 0.98359 | 0.9826  | 0.99024 |
| 3654 | 0.98351 | 0.98292 | 0.99104 |
| 3653 | 0.98342 | 0.98308 | 0.99121 |
| 3652 | 0.9833  | 0.98254 | 0.9892  |
| 3651 | 0.98319 | 0.98299 | 0.98688 |
| 3650 | 0.98309 | 0.98448 | 0.98704 |
| 3649 | 0.98299 | 0.98415 | 0.9873  |
| 3648 | 0.98289 | 0.98352 | 0.98727 |
| 3647 | 0.98277 | 0.98365 | 0.98809 |
| 3646 | 0.98264 | 0.98362 | 0.98851 |
| 3645 | 0.98251 | 0.98329 | 0.98833 |
| 3644 | 0.98239 | 0.98306 | 0.98818 |
| 3643 | 0.98228 | 0.98309 | 0.98834 |
| 3642 | 0.98216 | 0.9832  | 0.98847 |
| 3641 | 0.98205 | 0.98326 | 0.9883  |
| 3640 | 0.98194 | 0.98327 | 0.98803 |
| 3639 | 0.98183 | 0.9832  | 0.98792 |
| 3638 | 0.98173 | 0.98293 | 0.98795 |
| 3637 | 0.98163 | 0.98254 | 0.98798 |
| 3636 | 0.98153 | 0.98219 | 0.98788 |
| 3635 | 0.98145 | 0.98191 | 0.98759 |
| 3634 | 0.98138 | 0.98168 | 0.98726 |
| 3633 | 0.98131 | 0.98162 | 0.98716 |
| 3632 | 0.98125 | 0.98177 | 0.98723 |
| 3631 | 0.9812  | 0.98217 | 0.98726 |
| 3630 | 0.98114 | 0.98236 | 0.98721 |
| 3629 | 0.98107 | 0.98137 | 0.98655 |
| 3628 | 0.981   | 0.98045 | 0.98595 |
| 3627 | 0.98092 | 0.98044 | 0.98602 |
| 3626 | 0.98082 | 0.98051 | 0.98594 |
| 3625 | 0.9807  | 0.98049 | 0.98574 |
| 3624 | 0.98056 | 0.98066 | 0.98595 |
| 3623 | 0.98041 | 0.98089 | 0.98629 |
| 3622 | 0.98028 | 0.98098 | 0.98634 |
| 3621 | 0.98017 | 0.98117 | 0.98628 |
| 3620 | 0.98008 | 0.98135 | 0.98627 |

|      |         |         |         |
|------|---------|---------|---------|
| 3619 | 0.98    | 0.98115 | 0.98598 |
| 3618 | 0.97992 | 0.9808  | 0.98554 |
| 3617 | 0.97983 | 0.98042 | 0.98521 |
| 3616 | 0.97975 | 0.98002 | 0.98493 |
| 3615 | 0.97967 | 0.97986 | 0.98486 |
| 3614 | 0.97959 | 0.97993 | 0.98501 |
| 3613 | 0.9795  | 0.97988 | 0.98498 |
| 3612 | 0.9794  | 0.9795  | 0.98444 |
| 3611 | 0.9793  | 0.97894 | 0.98357 |
| 3610 | 0.97921 | 0.97859 | 0.98301 |
| 3609 | 0.97913 | 0.97857 | 0.98311 |
| 3608 | 0.97904 | 0.97869 | 0.9835  |
| 3607 | 0.97895 | 0.97889 | 0.98376 |
| 3606 | 0.97885 | 0.97915 | 0.98378 |
| 3605 | 0.97874 | 0.97938 | 0.98355 |
| 3604 | 0.97861 | 0.97953 | 0.98318 |
| 3603 | 0.97846 | 0.97959 | 0.98281 |
| 3602 | 0.9783  | 0.97958 | 0.98258 |
| 3601 | 0.97816 | 0.97948 | 0.98253 |
| 3600 | 0.97802 | 0.97935 | 0.98272 |
| 3599 | 0.97787 | 0.97916 | 0.98306 |
| 3598 | 0.97774 | 0.97877 | 0.98332 |
| 3597 | 0.97762 | 0.97826 | 0.98337 |
| 3596 | 0.9775  | 0.97787 | 0.98325 |
| 3595 | 0.97739 | 0.97759 | 0.98289 |
| 3594 | 0.97727 | 0.97738 | 0.98238 |
| 3593 | 0.97715 | 0.97741 | 0.98218 |
| 3592 | 0.97703 | 0.97763 | 0.98238 |
| 3591 | 0.97692 | 0.97759 | 0.9824  |
| 3590 | 0.97681 | 0.97736 | 0.98206 |
| 3589 | 0.9767  | 0.97756 | 0.98215 |
| 3588 | 0.9766  | 0.97788 | 0.98268 |
| 3587 | 0.9765  | 0.97765 | 0.98267 |
| 3586 | 0.97639 | 0.97719 | 0.98206 |
| 3585 | 0.97628 | 0.97676 | 0.9813  |
| 3584 | 0.97616 | 0.97645 | 0.98065 |
| 3583 | 0.97604 | 0.97637 | 0.98021 |
| 3582 | 0.97592 | 0.97648 | 0.97998 |
| 3581 | 0.97579 | 0.97665 | 0.9799  |
| 3580 | 0.97566 | 0.97671 | 0.97987 |
| 3579 | 0.97552 | 0.97664 | 0.97983 |
| 3578 | 0.97537 | 0.97651 | 0.97973 |
| 3577 | 0.97523 | 0.97638 | 0.97963 |

|      |         |         |         |
|------|---------|---------|---------|
| 3576 | 0.9751  | 0.97625 | 0.97956 |
| 3575 | 0.97496 | 0.97617 | 0.97953 |
| 3574 | 0.97483 | 0.9761  | 0.9794  |
| 3573 | 0.97471 | 0.97597 | 0.97913 |
| 3572 | 0.97461 | 0.97582 | 0.9789  |
| 3571 | 0.97451 | 0.97574 | 0.97892 |
| 3570 | 0.97441 | 0.97559 | 0.97899 |
| 3569 | 0.9743  | 0.97542 | 0.97894 |
| 3568 | 0.97418 | 0.97538 | 0.97903 |
| 3567 | 0.97404 | 0.97521 | 0.97914 |
| 3566 | 0.9739  | 0.97502 | 0.97909 |
| 3565 | 0.97373 | 0.97488 | 0.97894 |
| 3564 | 0.97355 | 0.97456 | 0.97855 |
| 3563 | 0.97335 | 0.97425 | 0.97807 |
| 3562 | 0.97315 | 0.97417 | 0.97765 |
| 3561 | 0.97296 | 0.9741  | 0.97717 |
| 3560 | 0.97277 | 0.97388 | 0.97657 |
| 3559 | 0.97257 | 0.9736  | 0.97608 |
| 3558 | 0.97238 | 0.97339 | 0.97587 |
| 3557 | 0.97218 | 0.97316 | 0.97584 |
| 3556 | 0.97197 | 0.9728  | 0.97574 |
| 3555 | 0.97177 | 0.97242 | 0.97561 |
| 3554 | 0.97156 | 0.97226 | 0.97566 |
| 3553 | 0.97135 | 0.97224 | 0.97581 |
| 3552 | 0.97115 | 0.97208 | 0.97574 |
| 3551 | 0.97094 | 0.97171 | 0.97525 |
| 3550 | 0.97073 | 0.9713  | 0.97449 |
| 3549 | 0.97053 | 0.97093 | 0.97368 |
| 3548 | 0.97032 | 0.97061 | 0.97301 |
| 3547 | 0.9701  | 0.97039 | 0.9726  |
| 3546 | 0.96987 | 0.97032 | 0.97244 |
| 3545 | 0.96963 | 0.97034 | 0.97235 |
| 3544 | 0.96939 | 0.9703  | 0.97224 |
| 3543 | 0.96916 | 0.97005 | 0.97214 |
| 3542 | 0.96894 | 0.96964 | 0.97212 |
| 3541 | 0.96872 | 0.96922 | 0.97215 |
| 3540 | 0.96851 | 0.96888 | 0.97218 |
| 3539 | 0.96829 | 0.96869 | 0.97219 |
| 3538 | 0.96806 | 0.96858 | 0.97216 |
| 3537 | 0.96782 | 0.96842 | 0.97201 |
| 3536 | 0.96758 | 0.96816 | 0.97165 |
| 3535 | 0.96735 | 0.96779 | 0.97113 |
| 3534 | 0.96711 | 0.96735 | 0.97058 |

|      |         |         |         |
|------|---------|---------|---------|
| 3533 | 0.96688 | 0.96695 | 0.97019 |
| 3532 | 0.96664 | 0.96666 | 0.96999 |
| 3531 | 0.9664  | 0.96643 | 0.96984 |
| 3530 | 0.96616 | 0.96618 | 0.96958 |
| 3529 | 0.96592 | 0.96597 | 0.9692  |
| 3528 | 0.96569 | 0.96585 | 0.96869 |
| 3527 | 0.96546 | 0.96569 | 0.96802 |
| 3526 | 0.96523 | 0.96541 | 0.96732 |
| 3525 | 0.96501 | 0.96509 | 0.96688 |
| 3524 | 0.96479 | 0.96485 | 0.96677 |
| 3523 | 0.96458 | 0.96469 | 0.96673 |
| 3522 | 0.96437 | 0.96455 | 0.96651 |
| 3521 | 0.96414 | 0.96436 | 0.96609 |
| 3520 | 0.96389 | 0.9641  | 0.96565 |
| 3519 | 0.96363 | 0.96379 | 0.96534 |
| 3518 | 0.96336 | 0.96348 | 0.96512 |
| 3517 | 0.96308 | 0.96311 | 0.96481 |
| 3516 | 0.9628  | 0.96269 | 0.96433 |
| 3515 | 0.96252 | 0.96232 | 0.9638  |
| 3514 | 0.96225 | 0.96201 | 0.96334 |
| 3513 | 0.96198 | 0.96168 | 0.96291 |
| 3512 | 0.96172 | 0.9613  | 0.96241 |
| 3511 | 0.96146 | 0.96083 | 0.96175 |
| 3510 | 0.96119 | 0.96025 | 0.96096 |
| 3509 | 0.96093 | 0.95958 | 0.96022 |
| 3508 | 0.96067 | 0.95894 | 0.95967 |
| 3507 | 0.9604  | 0.95834 | 0.9592  |
| 3506 | 0.96014 | 0.95775 | 0.95855 |
| 3505 | 0.95987 | 0.95724 | 0.95771 |
| 3504 | 0.9596  | 0.95687 | 0.9568  |
| 3503 | 0.95932 | 0.95659 | 0.95588 |
| 3502 | 0.95904 | 0.95627 | 0.95492 |
| 3501 | 0.95877 | 0.9558  | 0.95387 |
| 3500 | 0.95849 | 0.95517 | 0.95273 |
| 3499 | 0.95821 | 0.95448 | 0.95162 |
| 3498 | 0.95791 | 0.95377 | 0.95068 |
| 3497 | 0.95762 | 0.95292 | 0.94989 |
| 3496 | 0.95733 | 0.9519  | 0.94907 |
| 3495 | 0.95705 | 0.95083 | 0.94806 |
| 3494 | 0.95678 | 0.94986 | 0.94687 |
| 3493 | 0.95652 | 0.94904 | 0.94566 |
| 3492 | 0.95626 | 0.94838 | 0.94465 |
| 3491 | 0.956   | 0.94782 | 0.94386 |

|      |         |         |         |
|------|---------|---------|---------|
| 3490 | 0.95573 | 0.94735 | 0.94317 |
| 3489 | 0.95547 | 0.94702 | 0.94256 |
| 3488 | 0.95521 | 0.94688 | 0.94219 |
| 3487 | 0.95496 | 0.94685 | 0.94213 |
| 3486 | 0.95472 | 0.94684 | 0.94231 |
| 3485 | 0.95448 | 0.94678 | 0.94263 |
| 3484 | 0.95424 | 0.94675 | 0.94305 |
| 3483 | 0.95401 | 0.94681 | 0.94347 |
| 3482 | 0.9538  | 0.9469  | 0.94377 |
| 3481 | 0.95359 | 0.94696 | 0.94394 |
| 3480 | 0.9534  | 0.94699 | 0.94411 |
| 3479 | 0.9532  | 0.94702 | 0.94435 |
| 3478 | 0.95301 | 0.94706 | 0.94457 |
| 3477 | 0.95282 | 0.94711 | 0.9447  |
| 3476 | 0.95264 | 0.94711 | 0.94472 |
| 3475 | 0.95246 | 0.947   | 0.94466 |
| 3474 | 0.95228 | 0.94681 | 0.94456 |
| 3473 | 0.95211 | 0.94656 | 0.94447 |
| 3472 | 0.95193 | 0.94629 | 0.94441 |
| 3471 | 0.95176 | 0.946   | 0.94436 |
| 3470 | 0.95159 | 0.94573 | 0.94427 |
| 3469 | 0.95143 | 0.94553 | 0.94409 |
| 3468 | 0.95127 | 0.9454  | 0.94384 |
| 3467 | 0.95112 | 0.94525 | 0.9436  |
| 3466 | 0.95097 | 0.945   | 0.94338 |
| 3465 | 0.95082 | 0.94467 | 0.9431  |
| 3464 | 0.95066 | 0.94435 | 0.94272 |
| 3463 | 0.95051 | 0.94408 | 0.94225 |
| 3462 | 0.95035 | 0.94379 | 0.94165 |
| 3461 | 0.95019 | 0.94338 | 0.94088 |
| 3460 | 0.95004 | 0.94286 | 0.94002 |
| 3459 | 0.9499  | 0.94232 | 0.9392  |
| 3458 | 0.94975 | 0.9418  | 0.93845 |
| 3457 | 0.9496  | 0.94123 | 0.93766 |
| 3456 | 0.94945 | 0.94058 | 0.93674 |
| 3455 | 0.94928 | 0.93987 | 0.93576 |
| 3454 | 0.94912 | 0.93913 | 0.93477 |
| 3453 | 0.94896 | 0.93838 | 0.93382 |
| 3452 | 0.9488  | 0.9376  | 0.9329  |
| 3451 | 0.94862 | 0.93683 | 0.93194 |
| 3450 | 0.94844 | 0.93607 | 0.93083 |
| 3449 | 0.94825 | 0.93532 | 0.92955 |
| 3448 | 0.94806 | 0.93457 | 0.92823 |

|      |         |         |         |
|------|---------|---------|---------|
| 3447 | 0.94787 | 0.93379 | 0.92702 |
| 3446 | 0.94768 | 0.933   | 0.92603 |
| 3445 | 0.94749 | 0.9323  | 0.92533 |
| 3444 | 0.94729 | 0.93177 | 0.92491 |
| 3443 | 0.9471  | 0.93147 | 0.92472 |
| 3442 | 0.94689 | 0.93133 | 0.9247  |
| 3441 | 0.94668 | 0.93127 | 0.92476 |
| 3440 | 0.94648 | 0.93129 | 0.9249  |
| 3439 | 0.94627 | 0.93136 | 0.9251  |
| 3438 | 0.94607 | 0.93149 | 0.92538 |
| 3437 | 0.94587 | 0.93167 | 0.92584 |
| 3436 | 0.94568 | 0.93192 | 0.92654 |
| 3435 | 0.94551 | 0.93222 | 0.92739 |
| 3434 | 0.94534 | 0.93252 | 0.92824 |
| 3433 | 0.94518 | 0.93281 | 0.92897 |
| 3432 | 0.94502 | 0.93306 | 0.92957 |
| 3431 | 0.94488 | 0.93326 | 0.93006 |
| 3430 | 0.94474 | 0.9334  | 0.93046 |
| 3429 | 0.94461 | 0.93347 | 0.93074 |
| 3428 | 0.94448 | 0.93349 | 0.93094 |
| 3427 | 0.94436 | 0.93352 | 0.9311  |
| 3426 | 0.94425 | 0.93355 | 0.93125 |
| 3425 | 0.94414 | 0.93352 | 0.93132 |
| 3424 | 0.94405 | 0.93343 | 0.93133 |
| 3423 | 0.94396 | 0.9334  | 0.9314  |
| 3422 | 0.94388 | 0.93348 | 0.93161 |
| 3421 | 0.94381 | 0.93358 | 0.93184 |
| 3420 | 0.94375 | 0.93359 | 0.93194 |
| 3419 | 0.9437  | 0.93353 | 0.93193 |
| 3418 | 0.94365 | 0.9335  | 0.93193 |
| 3417 | 0.9436  | 0.93348 | 0.93201 |
| 3416 | 0.94356 | 0.93338 | 0.93209 |
| 3415 | 0.94352 | 0.93318 | 0.93206 |
| 3414 | 0.9435  | 0.93292 | 0.93185 |
| 3413 | 0.94348 | 0.93269 | 0.93153 |
| 3412 | 0.94348 | 0.93255 | 0.93123 |
| 3411 | 0.94348 | 0.93247 | 0.93103 |
| 3410 | 0.94349 | 0.93239 | 0.93098 |
| 3409 | 0.9435  | 0.93227 | 0.93101 |
| 3408 | 0.9435  | 0.93213 | 0.93103 |
| 3407 | 0.9435  | 0.93197 | 0.93095 |
| 3406 | 0.94351 | 0.93179 | 0.93075 |
| 3405 | 0.94351 | 0.93158 | 0.93051 |

|      |         |         |         |
|------|---------|---------|---------|
| 3404 | 0.94351 | 0.93138 | 0.93035 |
| 3403 | 0.94351 | 0.93125 | 0.93029 |
| 3402 | 0.94351 | 0.93121 | 0.93027 |
| 3401 | 0.94352 | 0.93117 | 0.93021 |
| 3400 | 0.94352 | 0.93109 | 0.93014 |
| 3399 | 0.94353 | 0.93096 | 0.9301  |
| 3398 | 0.94353 | 0.93075 | 0.93004 |
| 3397 | 0.94353 | 0.93048 | 0.92987 |
| 3396 | 0.94351 | 0.93019 | 0.92953 |
| 3395 | 0.9435  | 0.92996 | 0.92912 |
| 3394 | 0.94348 | 0.92984 | 0.92877 |
| 3393 | 0.94346 | 0.92981 | 0.92857 |
| 3392 | 0.94343 | 0.92976 | 0.92849 |
| 3391 | 0.94339 | 0.92965 | 0.92844 |
| 3390 | 0.94336 | 0.92951 | 0.92833 |
| 3389 | 0.94333 | 0.92939 | 0.92813 |
| 3388 | 0.9433  | 0.92925 | 0.92791 |
| 3387 | 0.94328 | 0.92909 | 0.92781 |
| 3386 | 0.94325 | 0.92893 | 0.92785 |
| 3385 | 0.94322 | 0.92878 | 0.92793 |
| 3384 | 0.94319 | 0.92862 | 0.92794 |
| 3383 | 0.94316 | 0.92845 | 0.92784 |
| 3382 | 0.94313 | 0.92832 | 0.92768 |
| 3381 | 0.94309 | 0.92829 | 0.92752 |
| 3380 | 0.94304 | 0.92838 | 0.92739 |
| 3379 | 0.94299 | 0.92849 | 0.92721 |
| 3378 | 0.94293 | 0.92851 | 0.92697 |
| 3377 | 0.94288 | 0.92838 | 0.92674 |
| 3376 | 0.94282 | 0.92813 | 0.92662 |
| 3375 | 0.94276 | 0.92783 | 0.92661 |
| 3374 | 0.9427  | 0.92753 | 0.92656 |
| 3373 | 0.94262 | 0.92725 | 0.92631 |
| 3372 | 0.94254 | 0.92702 | 0.92587 |
| 3371 | 0.94246 | 0.92686 | 0.92537 |
| 3370 | 0.94236 | 0.92676 | 0.92496 |
| 3369 | 0.94226 | 0.92668 | 0.92466 |
| 3368 | 0.94215 | 0.9266  | 0.9244  |
| 3367 | 0.94204 | 0.92648 | 0.92413 |
| 3366 | 0.94194 | 0.92634 | 0.92384 |
| 3365 | 0.94184 | 0.92618 | 0.92361 |
| 3364 | 0.94175 | 0.926   | 0.92347 |
| 3363 | 0.94165 | 0.9258  | 0.92347 |
| 3362 | 0.94156 | 0.92559 | 0.92352 |



|      |         |         |         |
|------|---------|---------|---------|
| 3361 | 0.94146 | 0.92537 | 0.9235  |
| 3360 | 0.94137 | 0.92516 | 0.92336 |
| 3359 | 0.94127 | 0.92499 | 0.92311 |
| 3358 | 0.94117 | 0.92487 | 0.92277 |
| 3357 | 0.94107 | 0.92476 | 0.92233 |
| 3356 | 0.94097 | 0.92464 | 0.92183 |
| 3355 | 0.94087 | 0.92452 | 0.9214  |
| 3354 | 0.94078 | 0.92443 | 0.92112 |
| 3353 | 0.9407  | 0.92442 | 0.92096 |
| 3352 | 0.94061 | 0.92444 | 0.92086 |
| 3351 | 0.94053 | 0.92445 | 0.92076 |
| 3350 | 0.94045 | 0.9244  | 0.92064 |
| 3349 | 0.94036 | 0.92429 | 0.92047 |
| 3348 | 0.94027 | 0.92415 | 0.92026 |
| 3347 | 0.94018 | 0.92398 | 0.92005 |
| 3346 | 0.94009 | 0.92379 | 0.91985 |
| 3345 | 0.94001 | 0.92359 | 0.91966 |
| 3344 | 0.93993 | 0.9234  | 0.91949 |
| 3343 | 0.93985 | 0.92319 | 0.91938 |
| 3342 | 0.93979 | 0.92296 | 0.91936 |
| 3341 | 0.93974 | 0.92278 | 0.91939 |
| 3340 | 0.9397  | 0.92273 | 0.91934 |
| 3339 | 0.93966 | 0.92286 | 0.91918 |
| 3338 | 0.93963 | 0.92309 | 0.91898 |
| 3337 | 0.93961 | 0.92327 | 0.91885 |
| 3336 | 0.93959 | 0.9233  | 0.91888 |
| 3335 | 0.93958 | 0.92322 | 0.91903 |
| 3334 | 0.93958 | 0.9231  | 0.91924 |
| 3333 | 0.93957 | 0.92303 | 0.91945 |
| 3332 | 0.93958 | 0.92303 | 0.91964 |
| 3331 | 0.93959 | 0.92309 | 0.91978 |
| 3330 | 0.93962 | 0.92314 | 0.91984 |
| 3329 | 0.93965 | 0.92317 | 0.91983 |
| 3328 | 0.9397  | 0.92318 | 0.91979 |
| 3327 | 0.93975 | 0.9232  | 0.91983 |
| 3326 | 0.9398  | 0.92323 | 0.91999 |
| 3325 | 0.93984 | 0.92326 | 0.92022 |
| 3324 | 0.93988 | 0.92328 | 0.92042 |
| 3323 | 0.93993 | 0.9233  | 0.92055 |
| 3322 | 0.93997 | 0.92337 | 0.92065 |
| 3321 | 0.94003 | 0.92347 | 0.92073 |
| 3320 | 0.94009 | 0.92357 | 0.92078 |
| 3319 | 0.94017 | 0.92361 | 0.92079 |

|      |         |         |         |
|------|---------|---------|---------|
| 3318 | 0.94025 | 0.92358 | 0.92081 |
| 3317 | 0.94033 | 0.92351 | 0.92082 |
| 3316 | 0.94043 | 0.92348 | 0.92083 |
| 3315 | 0.94053 | 0.92354 | 0.92088 |
| 3314 | 0.94063 | 0.92367 | 0.92105 |
| 3313 | 0.94073 | 0.92376 | 0.9213  |
| 3312 | 0.94083 | 0.92372 | 0.9215  |
| 3311 | 0.94092 | 0.92359 | 0.92159 |
| 3310 | 0.94102 | 0.92349 | 0.92158 |
| 3309 | 0.9411  | 0.92353 | 0.92153 |
| 3308 | 0.94118 | 0.92369 | 0.9215  |
| 3307 | 0.94125 | 0.92391 | 0.9215  |
| 3306 | 0.94131 | 0.92408 | 0.92154 |
| 3305 | 0.94137 | 0.92413 | 0.92162 |
| 3304 | 0.94143 | 0.92411 | 0.92173 |
| 3303 | 0.94149 | 0.9241  | 0.92183 |
| 3302 | 0.94155 | 0.92414 | 0.9219  |
| 3301 | 0.9416  | 0.92422 | 0.92197 |
| 3300 | 0.94165 | 0.92427 | 0.92206 |
| 3299 | 0.94169 | 0.9243  | 0.92214 |
| 3298 | 0.94173 | 0.92431 | 0.92219 |
| 3297 | 0.94176 | 0.92431 | 0.92223 |
| 3296 | 0.9418  | 0.9243  | 0.92227 |
| 3295 | 0.94185 | 0.92429 | 0.9223  |
| 3294 | 0.9419  | 0.92427 | 0.9223  |
| 3293 | 0.94194 | 0.92425 | 0.92229 |
| 3292 | 0.94199 | 0.92428 | 0.9223  |
| 3291 | 0.94202 | 0.92441 | 0.92239 |
| 3290 | 0.94205 | 0.92464 | 0.92259 |
| 3289 | 0.94208 | 0.92486 | 0.92284 |
| 3288 | 0.94211 | 0.925   | 0.92301 |
| 3287 | 0.94213 | 0.92505 | 0.92307 |
| 3286 | 0.94215 | 0.92508 | 0.92309 |
| 3285 | 0.94216 | 0.92514 | 0.92321 |
| 3284 | 0.94217 | 0.92522 | 0.92344 |
| 3283 | 0.94217 | 0.92526 | 0.92369 |
| 3282 | 0.94218 | 0.92523 | 0.92387 |
| 3281 | 0.9422  | 0.92516 | 0.92404 |
| 3280 | 0.94223 | 0.9251  | 0.92429 |
| 3279 | 0.94225 | 0.92511 | 0.92464 |
| 3278 | 0.94227 | 0.92521 | 0.92497 |
| 3277 | 0.94228 | 0.92538 | 0.92516 |
| 3276 | 0.9423  | 0.92558 | 0.92529 |

|      |         |         |         |
|------|---------|---------|---------|
| 3275 | 0.9423  | 0.92574 | 0.92542 |
| 3274 | 0.94232 | 0.92584 | 0.92551 |
| 3273 | 0.94233 | 0.92589 | 0.92554 |
| 3272 | 0.94236 | 0.92591 | 0.92556 |
| 3271 | 0.94239 | 0.92594 | 0.92567 |
| 3270 | 0.94243 | 0.926   | 0.92585 |
| 3269 | 0.94247 | 0.92609 | 0.926   |
| 3268 | 0.94252 | 0.92622 | 0.9261  |
| 3267 | 0.94257 | 0.92636 | 0.9262  |
| 3266 | 0.94261 | 0.92653 | 0.92644 |
| 3265 | 0.94265 | 0.9267  | 0.92682 |
| 3264 | 0.94268 | 0.92689 | 0.92726 |
| 3263 | 0.94271 | 0.92709 | 0.92764 |
| 3262 | 0.94275 | 0.9273  | 0.92789 |
| 3261 | 0.94278 | 0.92748 | 0.92806 |
| 3260 | 0.94282 | 0.9276  | 0.92823 |
| 3259 | 0.94286 | 0.92767 | 0.92849 |
| 3258 | 0.94291 | 0.92774 | 0.92882 |
| 3257 | 0.94297 | 0.92784 | 0.92912 |
| 3256 | 0.94304 | 0.928   | 0.92928 |
| 3255 | 0.94313 | 0.92818 | 0.92936 |
| 3254 | 0.94323 | 0.92835 | 0.92941 |
| 3253 | 0.94332 | 0.92843 | 0.92947 |
| 3252 | 0.94342 | 0.92847 | 0.92954 |
| 3251 | 0.94352 | 0.92853 | 0.92963 |
| 3250 | 0.94362 | 0.92863 | 0.92976 |
| 3249 | 0.94373 | 0.92875 | 0.92992 |
| 3248 | 0.94385 | 0.92887 | 0.93014 |
| 3247 | 0.94397 | 0.92899 | 0.93042 |
| 3246 | 0.9441  | 0.92912 | 0.93074 |
| 3245 | 0.94422 | 0.92926 | 0.93104 |
| 3244 | 0.94433 | 0.9294  | 0.93126 |
| 3243 | 0.94444 | 0.92954 | 0.93142 |
| 3242 | 0.94454 | 0.92966 | 0.93157 |
| 3241 | 0.94465 | 0.92975 | 0.93178 |
| 3240 | 0.94475 | 0.92985 | 0.93208 |
| 3239 | 0.94486 | 0.92997 | 0.93245 |
| 3238 | 0.94497 | 0.93013 | 0.93281 |
| 3237 | 0.94508 | 0.93033 | 0.93308 |
| 3236 | 0.9452  | 0.93052 | 0.93323 |
| 3235 | 0.94531 | 0.93064 | 0.93332 |
| 3234 | 0.94542 | 0.9307  | 0.93341 |
| 3233 | 0.94553 | 0.93073 | 0.93356 |

|      |         |         |         |
|------|---------|---------|---------|
| 3232 | 0.94565 | 0.93079 | 0.93379 |
| 3231 | 0.94576 | 0.93094 | 0.93411 |
| 3230 | 0.94587 | 0.93117 | 0.93438 |
| 3229 | 0.94599 | 0.93142 | 0.9345  |
| 3228 | 0.9461  | 0.93165 | 0.93448 |
| 3227 | 0.94621 | 0.93183 | 0.93447 |
| 3226 | 0.94631 | 0.93196 | 0.93457 |
| 3225 | 0.94642 | 0.93206 | 0.9348  |
| 3224 | 0.94652 | 0.93213 | 0.93508 |
| 3223 | 0.94663 | 0.93218 | 0.93531 |
| 3222 | 0.94673 | 0.93221 | 0.9354  |
| 3221 | 0.94684 | 0.93228 | 0.9354  |
| 3220 | 0.94696 | 0.9324  | 0.93545 |
| 3219 | 0.94706 | 0.93257 | 0.9356  |
| 3218 | 0.94716 | 0.93273 | 0.93576 |
| 3217 | 0.94726 | 0.93286 | 0.93584 |
| 3216 | 0.94736 | 0.93299 | 0.93587 |
| 3215 | 0.94746 | 0.93314 | 0.93593 |
| 3214 | 0.94757 | 0.9333  | 0.93605 |
| 3213 | 0.94768 | 0.93346 | 0.93621 |
| 3212 | 0.94781 | 0.93365 | 0.93643 |
| 3211 | 0.94794 | 0.93386 | 0.9367  |
| 3210 | 0.94808 | 0.93405 | 0.93701 |
| 3209 | 0.94823 | 0.93417 | 0.93726 |
| 3208 | 0.94838 | 0.93422 | 0.93736 |
| 3207 | 0.94853 | 0.93425 | 0.93737 |
| 3206 | 0.94869 | 0.93431 | 0.93741 |
| 3205 | 0.94883 | 0.93442 | 0.9375  |
| 3204 | 0.94897 | 0.93454 | 0.93761 |
| 3203 | 0.94911 | 0.93465 | 0.9377  |
| 3202 | 0.94926 | 0.93477 | 0.93782 |
| 3201 | 0.9494  | 0.93487 | 0.938   |
| 3200 | 0.94955 | 0.93493 | 0.93822 |
| 3199 | 0.9497  | 0.93499 | 0.93844 |
| 3198 | 0.94984 | 0.93506 | 0.93865 |
| 3197 | 0.94998 | 0.93516 | 0.93885 |
| 3196 | 0.95012 | 0.93528 | 0.93905 |
| 3195 | 0.95026 | 0.9354  | 0.93923 |
| 3194 | 0.95039 | 0.93551 | 0.93931 |
| 3193 | 0.95054 | 0.93561 | 0.9393  |
| 3192 | 0.95068 | 0.93572 | 0.93923 |
| 3191 | 0.95083 | 0.93582 | 0.9392  |
| 3190 | 0.95098 | 0.9359  | 0.93925 |

|      |         |         |         |
|------|---------|---------|---------|
| 3189 | 0.95112 | 0.93599 | 0.93937 |
| 3188 | 0.95127 | 0.9361  | 0.93947 |
| 3187 | 0.95141 | 0.93622 | 0.93953 |
| 3186 | 0.95156 | 0.93636 | 0.93958 |
| 3185 | 0.95169 | 0.93647 | 0.93973 |
| 3184 | 0.95182 | 0.93657 | 0.93999 |
| 3183 | 0.95195 | 0.93666 | 0.94025 |
| 3182 | 0.95208 | 0.93673 | 0.94043 |
| 3181 | 0.95221 | 0.93681 | 0.94054 |
| 3180 | 0.95234 | 0.93689 | 0.94067 |
| 3179 | 0.95247 | 0.93696 | 0.94084 |
| 3178 | 0.95259 | 0.93703 | 0.94093 |
| 3177 | 0.95272 | 0.93713 | 0.94086 |
| 3176 | 0.95284 | 0.93726 | 0.94069 |
| 3175 | 0.95297 | 0.93741 | 0.94054 |
| 3174 | 0.95309 | 0.93755 | 0.94053 |
| 3173 | 0.95322 | 0.93767 | 0.94063 |
| 3172 | 0.95335 | 0.93779 | 0.9408  |
| 3171 | 0.95347 | 0.93792 | 0.94101 |
| 3170 | 0.95359 | 0.93801 | 0.94121 |
| 3169 | 0.95371 | 0.93807 | 0.94135 |
| 3168 | 0.95383 | 0.93819 | 0.94139 |
| 3167 | 0.95396 | 0.93838 | 0.94138 |
| 3166 | 0.95408 | 0.9386  | 0.94145 |
| 3165 | 0.95421 | 0.93874 | 0.94169 |
| 3164 | 0.95434 | 0.93878 | 0.94199 |
| 3163 | 0.95448 | 0.93877 | 0.94223 |
| 3162 | 0.95462 | 0.93881 | 0.94233 |
| 3161 | 0.95476 | 0.93891 | 0.94233 |
| 3160 | 0.9549  | 0.93905 | 0.94231 |
| 3159 | 0.95504 | 0.93916 | 0.94238 |
| 3158 | 0.95517 | 0.93924 | 0.9426  |
| 3157 | 0.9553  | 0.93931 | 0.94289 |
| 3156 | 0.95541 | 0.93939 | 0.94315 |
| 3155 | 0.95553 | 0.93951 | 0.94335 |
| 3154 | 0.95564 | 0.93966 | 0.94355 |
| 3153 | 0.95575 | 0.93984 | 0.94378 |
| 3152 | 0.95586 | 0.94005 | 0.94398 |
| 3151 | 0.95597 | 0.94029 | 0.94413 |
| 3150 | 0.95608 | 0.94052 | 0.94425 |
| 3149 | 0.95619 | 0.94074 | 0.9444  |
| 3148 | 0.9563  | 0.94093 | 0.9446  |
| 3147 | 0.9564  | 0.94114 | 0.94483 |

|      |         |         |         |
|------|---------|---------|---------|
| 3146 | 0.9565  | 0.9414  | 0.94509 |
| 3145 | 0.95661 | 0.94169 | 0.94538 |
| 3144 | 0.95671 | 0.94197 | 0.9457  |
| 3143 | 0.95682 | 0.9422  | 0.946   |
| 3142 | 0.95693 | 0.94237 | 0.94626 |
| 3141 | 0.95703 | 0.94252 | 0.9465  |
| 3140 | 0.95714 | 0.94269 | 0.94674 |
| 3139 | 0.95725 | 0.94288 | 0.94694 |
| 3138 | 0.95735 | 0.94309 | 0.94708 |
| 3137 | 0.95744 | 0.94329 | 0.9472  |
| 3136 | 0.95753 | 0.94351 | 0.94739 |
| 3135 | 0.95762 | 0.94374 | 0.94771 |
| 3134 | 0.95771 | 0.94401 | 0.94812 |
| 3133 | 0.9578  | 0.9443  | 0.94852 |
| 3132 | 0.9579  | 0.94459 | 0.94883 |
| 3131 | 0.95799 | 0.94484 | 0.94906 |
| 3130 | 0.95808 | 0.94504 | 0.94928 |
| 3129 | 0.95818 | 0.9452  | 0.94958 |
| 3128 | 0.95827 | 0.94533 | 0.94998 |
| 3127 | 0.95836 | 0.94546 | 0.95041 |
| 3126 | 0.95844 | 0.94561 | 0.95076 |
| 3125 | 0.95853 | 0.94581 | 0.951   |
| 3124 | 0.95861 | 0.94609 | 0.95119 |
| 3123 | 0.95869 | 0.94642 | 0.95145 |
| 3122 | 0.95876 | 0.94671 | 0.95182 |
| 3121 | 0.95884 | 0.94692 | 0.95227 |
| 3120 | 0.95892 | 0.94708 | 0.95269 |
| 3119 | 0.95899 | 0.94726 | 0.95307 |
| 3118 | 0.95906 | 0.94751 | 0.95342 |
| 3117 | 0.95913 | 0.94782 | 0.95378 |
| 3116 | 0.95921 | 0.94815 | 0.95407 |
| 3115 | 0.95928 | 0.94842 | 0.95426 |
| 3114 | 0.95936 | 0.94862 | 0.95447 |
| 3113 | 0.95943 | 0.94877 | 0.95482 |
| 3112 | 0.9595  | 0.94892 | 0.9553  |
| 3111 | 0.95956 | 0.9491  | 0.9558  |
| 3110 | 0.95963 | 0.94935 | 0.95617 |
| 3109 | 0.95968 | 0.94965 | 0.95641 |
| 3108 | 0.95974 | 0.94996 | 0.95661 |
| 3107 | 0.95979 | 0.95022 | 0.95683 |
| 3106 | 0.95983 | 0.95042 | 0.95708 |
| 3105 | 0.95988 | 0.95061 | 0.95733 |
| 3104 | 0.95993 | 0.95081 | 0.95761 |

|      |         |         |         |
|------|---------|---------|---------|
| 3103 | 0.95998 | 0.95104 | 0.95795 |
| 3102 | 0.96002 | 0.95129 | 0.95837 |
| 3101 | 0.96007 | 0.95154 | 0.95877 |
| 3100 | 0.96012 | 0.95176 | 0.95908 |
| 3099 | 0.96016 | 0.952   | 0.95924 |
| 3098 | 0.96021 | 0.95228 | 0.95932 |
| 3097 | 0.96025 | 0.95258 | 0.95943 |
| 3096 | 0.96029 | 0.95282 | 0.95965 |
| 3095 | 0.96033 | 0.95299 | 0.95995 |
| 3094 | 0.96036 | 0.95313 | 0.96028 |
| 3093 | 0.96039 | 0.95327 | 0.96061 |
| 3092 | 0.96041 | 0.95343 | 0.96094 |
| 3091 | 0.96043 | 0.9536  | 0.96127 |
| 3090 | 0.96044 | 0.95381 | 0.96158 |
| 3089 | 0.96045 | 0.95404 | 0.96183 |
| 3088 | 0.96046 | 0.95427 | 0.96203 |
| 3087 | 0.96047 | 0.95448 | 0.96225 |
| 3086 | 0.96049 | 0.95467 | 0.96256 |
| 3085 | 0.9605  | 0.95486 | 0.96294 |
| 3084 | 0.96051 | 0.95509 | 0.96335 |
| 3083 | 0.96052 | 0.95534 | 0.96369 |
| 3082 | 0.96052 | 0.95557 | 0.96395 |
| 3081 | 0.96052 | 0.95573 | 0.96415 |
| 3080 | 0.96052 | 0.95583 | 0.96433 |
| 3079 | 0.96052 | 0.95594 | 0.9645  |
| 3078 | 0.96052 | 0.95614 | 0.96467 |
| 3077 | 0.96054 | 0.95641 | 0.96486 |
| 3076 | 0.96055 | 0.95667 | 0.9651  |
| 3075 | 0.96056 | 0.95688 | 0.96539 |
| 3074 | 0.96057 | 0.95707 | 0.96567 |
| 3073 | 0.96058 | 0.95725 | 0.96589 |
| 3072 | 0.96059 | 0.95747 | 0.9661  |
| 3071 | 0.96059 | 0.95769 | 0.96634 |
| 3070 | 0.9606  | 0.95787 | 0.96662 |
| 3069 | 0.96061 | 0.95799 | 0.96688 |
| 3068 | 0.96063 | 0.95806 | 0.96708 |
| 3067 | 0.96065 | 0.95816 | 0.96726 |
| 3066 | 0.96067 | 0.95831 | 0.96746 |
| 3065 | 0.9607  | 0.95851 | 0.9677  |
| 3064 | 0.96074 | 0.95868 | 0.96795 |
| 3063 | 0.96077 | 0.95884 | 0.96818 |
| 3062 | 0.96082 | 0.95902 | 0.96837 |
| 3061 | 0.96087 | 0.95925 | 0.96853 |

|      |         |         |         |
|------|---------|---------|---------|
| 3060 | 0.96093 | 0.95948 | 0.96866 |
| 3059 | 0.96099 | 0.95966 | 0.9688  |
| 3058 | 0.96106 | 0.95978 | 0.96897 |
| 3057 | 0.96113 | 0.95988 | 0.96918 |
| 3056 | 0.96121 | 0.95999 | 0.9694  |
| 3055 | 0.96129 | 0.96012 | 0.9696  |
| 3054 | 0.96137 | 0.96025 | 0.96976 |
| 3053 | 0.96145 | 0.96038 | 0.96989 |
| 3052 | 0.96154 | 0.96052 | 0.97    |
| 3051 | 0.96164 | 0.96069 | 0.97012 |
| 3050 | 0.96173 | 0.96086 | 0.97031 |
| 3049 | 0.96183 | 0.96101 | 0.97056 |
| 3048 | 0.96192 | 0.96114 | 0.97085 |
| 3047 | 0.96202 | 0.9613  | 0.97114 |
| 3046 | 0.96212 | 0.96145 | 0.97137 |
| 3045 | 0.96222 | 0.96158 | 0.97151 |
| 3044 | 0.96232 | 0.96172 | 0.97157 |
| 3043 | 0.96243 | 0.96186 | 0.97162 |
| 3042 | 0.96253 | 0.96202 | 0.97172 |
| 3041 | 0.96264 | 0.96218 | 0.97188 |
| 3040 | 0.96275 | 0.96233 | 0.97205 |
| 3039 | 0.96287 | 0.96248 | 0.9722  |
| 3038 | 0.96299 | 0.96261 | 0.97233 |
| 3037 | 0.96311 | 0.96273 | 0.9725  |
| 3036 | 0.96323 | 0.96284 | 0.97272 |
| 3035 | 0.96334 | 0.96293 | 0.97295 |
| 3034 | 0.96346 | 0.96302 | 0.97317 |
| 3033 | 0.96357 | 0.96316 | 0.97337 |
| 3032 | 0.96369 | 0.96333 | 0.97353 |
| 3031 | 0.96381 | 0.96349 | 0.97363 |
| 3030 | 0.96393 | 0.96361 | 0.97366 |
| 3029 | 0.96406 | 0.96367 | 0.97366 |
| 3028 | 0.96417 | 0.96372 | 0.97373 |
| 3027 | 0.96428 | 0.9638  | 0.9739  |
| 3026 | 0.96438 | 0.96393 | 0.97408 |
| 3025 | 0.96448 | 0.96408 | 0.97415 |
| 3024 | 0.96457 | 0.96422 | 0.97413 |
| 3023 | 0.96465 | 0.96435 | 0.97416 |
| 3022 | 0.96474 | 0.96447 | 0.97431 |
| 3021 | 0.96482 | 0.9646  | 0.97455 |
| 3020 | 0.96491 | 0.96473 | 0.97477 |
| 3019 | 0.96499 | 0.96484 | 0.9749  |
| 3018 | 0.96507 | 0.96493 | 0.975   |



|      |         |         |         |
|------|---------|---------|---------|
| 3017 | 0.96516 | 0.96503 | 0.97511 |
| 3016 | 0.96524 | 0.96516 | 0.97526 |
| 3015 | 0.96533 | 0.96529 | 0.9754  |
| 3014 | 0.96542 | 0.96537 | 0.97551 |
| 3013 | 0.9655  | 0.96537 | 0.97559 |
| 3012 | 0.96559 | 0.96534 | 0.97565 |
| 3011 | 0.96567 | 0.96537 | 0.97569 |
| 3010 | 0.96575 | 0.96545 | 0.97569 |
| 3009 | 0.96583 | 0.96554 | 0.97566 |
| 3008 | 0.9659  | 0.96562 | 0.97565 |
| 3007 | 0.96597 | 0.9657  | 0.97574 |
| 3006 | 0.96603 | 0.96579 | 0.97594 |
| 3005 | 0.9661  | 0.96589 | 0.97621 |
| 3004 | 0.96617 | 0.96601 | 0.97643 |
| 3003 | 0.96624 | 0.96615 | 0.97655 |
| 3002 | 0.9663  | 0.9663  | 0.97657 |
| 3001 | 0.96636 | 0.96643 | 0.97652 |
| 3000 | 0.96641 | 0.96649 | 0.97646 |
| 2999 | 0.96645 | 0.96652 | 0.97646 |
| 2998 | 0.96649 | 0.96657 | 0.97655 |
| 2997 | 0.96653 | 0.96668 | 0.97671 |
| 2996 | 0.96656 | 0.96682 | 0.97685 |
| 2995 | 0.96659 | 0.96697 | 0.9769  |
| 2994 | 0.96661 | 0.96707 | 0.97689 |
| 2993 | 0.96663 | 0.9671  | 0.97689 |
| 2992 | 0.96665 | 0.96706 | 0.97694 |
| 2991 | 0.96667 | 0.96696 | 0.97696 |
| 2990 | 0.96668 | 0.96683 | 0.97686 |
| 2989 | 0.96668 | 0.9667  | 0.97662 |
| 2988 | 0.96667 | 0.96659 | 0.97632 |
| 2987 | 0.96666 | 0.96647 | 0.97601 |
| 2986 | 0.96665 | 0.96638 | 0.97568 |
| 2985 | 0.96663 | 0.96631 | 0.97534 |
| 2984 | 0.96661 | 0.96624 | 0.97504 |
| 2983 | 0.96658 | 0.96617 | 0.97487 |
| 2982 | 0.96654 | 0.9661  | 0.97488 |
| 2981 | 0.9665  | 0.96608 | 0.97505 |
| 2980 | 0.96645 | 0.96612 | 0.97529 |
| 2979 | 0.9664  | 0.96621 | 0.97549 |
| 2978 | 0.96634 | 0.96627 | 0.97557 |
| 2977 | 0.96627 | 0.96623 | 0.97553 |
| 2976 | 0.96619 | 0.9661  | 0.97539 |
| 2975 | 0.96611 | 0.96595 | 0.97521 |

|      |         |         |         |
|------|---------|---------|---------|
| 2974 | 0.96602 | 0.96586 | 0.97501 |
| 2973 | 0.96594 | 0.9658  | 0.97485 |
| 2972 | 0.96585 | 0.96575 | 0.97478 |
| 2971 | 0.96577 | 0.9657  | 0.97479 |
| 2970 | 0.96569 | 0.96563 | 0.97483 |
| 2969 | 0.96561 | 0.96557 | 0.97481 |
| 2968 | 0.96553 | 0.9655  | 0.97472 |
| 2967 | 0.96545 | 0.96543 | 0.97457 |
| 2966 | 0.96537 | 0.96534 | 0.97438 |
| 2965 | 0.96528 | 0.96523 | 0.97412 |
| 2964 | 0.9652  | 0.96509 | 0.9738  |
| 2963 | 0.9651  | 0.96496 | 0.97346 |
| 2962 | 0.96501 | 0.96483 | 0.97308 |
| 2961 | 0.96492 | 0.9647  | 0.97271 |
| 2960 | 0.96482 | 0.96454 | 0.97239 |
| 2959 | 0.96471 | 0.96432 | 0.97217 |
| 2958 | 0.96461 | 0.96407 | 0.97206 |
| 2957 | 0.96449 | 0.96386 | 0.97199 |
| 2956 | 0.96438 | 0.96373 | 0.97191 |
| 2955 | 0.96425 | 0.96369 | 0.97184 |
| 2954 | 0.96413 | 0.96366 | 0.97179 |
| 2953 | 0.964   | 0.9636  | 0.97177 |
| 2952 | 0.96386 | 0.96348 | 0.9717  |
| 2951 | 0.96373 | 0.96332 | 0.97157 |
| 2950 | 0.9636  | 0.96312 | 0.97146 |
| 2949 | 0.96347 | 0.96286 | 0.97135 |
| 2948 | 0.96333 | 0.96257 | 0.97116 |
| 2947 | 0.9632  | 0.96232 | 0.97079 |
| 2946 | 0.96306 | 0.96214 | 0.97027 |
| 2945 | 0.96293 | 0.96199 | 0.96975 |
| 2944 | 0.96279 | 0.9618  | 0.96936 |
| 2943 | 0.96265 | 0.96153 | 0.96911 |
| 2942 | 0.96252 | 0.96116 | 0.9689  |
| 2941 | 0.96238 | 0.9607  | 0.96854 |
| 2940 | 0.96224 | 0.96014 | 0.96794 |
| 2939 | 0.96211 | 0.95952 | 0.96715 |
| 2938 | 0.96198 | 0.95893 | 0.96637 |
| 2937 | 0.96187 | 0.95843 | 0.96573 |
| 2936 | 0.96176 | 0.95801 | 0.96525 |
| 2935 | 0.96166 | 0.95766 | 0.96485 |
| 2934 | 0.96156 | 0.95736 | 0.96452 |
| 2933 | 0.96147 | 0.95711 | 0.96427 |
| 2932 | 0.9614  | 0.95687 | 0.9641  |

|      |         |         |         |
|------|---------|---------|---------|
| 2931 | 0.96133 | 0.95663 | 0.96401 |
| 2930 | 0.96128 | 0.95638 | 0.96391 |
| 2929 | 0.96123 | 0.95614 | 0.96375 |
| 2928 | 0.96119 | 0.95589 | 0.9635  |
| 2927 | 0.96116 | 0.95562 | 0.96318 |
| 2926 | 0.96115 | 0.95532 | 0.96286 |
| 2925 | 0.96116 | 0.95498 | 0.96256 |
| 2924 | 0.96118 | 0.95461 | 0.96227 |
| 2923 | 0.96121 | 0.95423 | 0.96194 |
| 2922 | 0.96125 | 0.95382 | 0.96155 |
| 2921 | 0.9613  | 0.95342 | 0.96114 |
| 2920 | 0.96137 | 0.95306 | 0.96071 |
| 2919 | 0.96145 | 0.9528  | 0.96023 |
| 2918 | 0.96153 | 0.95263 | 0.95972 |
| 2917 | 0.96162 | 0.95248 | 0.95928 |
| 2916 | 0.96171 | 0.95231 | 0.95898 |
| 2915 | 0.96181 | 0.95215 | 0.95875 |
| 2914 | 0.9619  | 0.95202 | 0.95846 |
| 2913 | 0.962   | 0.95187 | 0.95802 |
| 2912 | 0.9621  | 0.95167 | 0.95743 |
| 2911 | 0.9622  | 0.9514  | 0.95672 |
| 2910 | 0.9623  | 0.95107 | 0.95599 |
| 2909 | 0.9624  | 0.95071 | 0.95531 |
| 2908 | 0.9625  | 0.95033 | 0.95476 |
| 2907 | 0.9626  | 0.94996 | 0.95433 |
| 2906 | 0.96269 | 0.94962 | 0.954   |
| 2905 | 0.96279 | 0.94935 | 0.9538  |
| 2904 | 0.96288 | 0.94916 | 0.95375 |
| 2903 | 0.96297 | 0.94906 | 0.95381 |
| 2902 | 0.96306 | 0.94904 | 0.95391 |
| 2901 | 0.96314 | 0.94904 | 0.95397 |
| 2900 | 0.96322 | 0.949   | 0.95399 |
| 2899 | 0.96329 | 0.9489  | 0.95399 |
| 2898 | 0.96335 | 0.94876 | 0.95394 |
| 2897 | 0.96341 | 0.94862 | 0.95375 |
| 2896 | 0.96347 | 0.94847 | 0.95343 |
| 2895 | 0.96352 | 0.94833 | 0.95304 |
| 2894 | 0.96357 | 0.94821 | 0.95271 |
| 2893 | 0.96362 | 0.9481  | 0.9525  |
| 2892 | 0.96367 | 0.94804 | 0.9525  |
| 2891 | 0.96372 | 0.94807 | 0.95278 |
| 2890 | 0.96376 | 0.94825 | 0.95331 |
| 2889 | 0.96382 | 0.94858 | 0.95401 |

|      |         |         |         |
|------|---------|---------|---------|
| 2888 | 0.96387 | 0.949   | 0.95474 |
| 2887 | 0.96393 | 0.94941 | 0.95538 |
| 2886 | 0.96399 | 0.94978 | 0.95592 |
| 2885 | 0.96405 | 0.9501  | 0.95638 |
| 2884 | 0.96411 | 0.95035 | 0.95684 |
| 2883 | 0.96418 | 0.95051 | 0.9573  |
| 2882 | 0.96425 | 0.95059 | 0.95771 |
| 2881 | 0.96432 | 0.95064 | 0.95805 |
| 2880 | 0.96439 | 0.9507  | 0.95831 |
| 2879 | 0.96447 | 0.95079 | 0.95853 |
| 2878 | 0.96454 | 0.95089 | 0.95873 |
| 2877 | 0.96462 | 0.951   | 0.95893 |
| 2876 | 0.9647  | 0.95112 | 0.95914 |
| 2875 | 0.96477 | 0.95128 | 0.95937 |
| 2874 | 0.96484 | 0.95151 | 0.95967 |
| 2873 | 0.9649  | 0.95177 | 0.96005 |
| 2872 | 0.96496 | 0.95205 | 0.96053 |
| 2871 | 0.96502 | 0.95232 | 0.96106 |
| 2870 | 0.96508 | 0.95262 | 0.96159 |
| 2869 | 0.96515 | 0.95297 | 0.96209 |
| 2868 | 0.96521 | 0.95334 | 0.96255 |
| 2867 | 0.96528 | 0.95371 | 0.96302 |
| 2866 | 0.96535 | 0.95403 | 0.96351 |
| 2865 | 0.96542 | 0.95431 | 0.964   |
| 2864 | 0.96549 | 0.95457 | 0.96449 |
| 2863 | 0.96556 | 0.95485 | 0.96496 |
| 2862 | 0.96564 | 0.95513 | 0.96541 |
| 2861 | 0.96572 | 0.9554  | 0.9658  |
| 2860 | 0.96581 | 0.95566 | 0.96609 |
| 2859 | 0.96589 | 0.95592 | 0.96633 |
| 2858 | 0.96598 | 0.95617 | 0.96658 |
| 2857 | 0.96608 | 0.95641 | 0.96686 |
| 2856 | 0.96618 | 0.9566  | 0.96717 |
| 2855 | 0.96629 | 0.95673 | 0.96747 |
| 2854 | 0.9664  | 0.9568  | 0.96767 |
| 2853 | 0.96652 | 0.95682 | 0.96777 |
| 2852 | 0.96664 | 0.95683 | 0.96785 |
| 2851 | 0.96677 | 0.95691 | 0.96801 |
| 2850 | 0.96691 | 0.95711 | 0.96835 |
| 2849 | 0.96705 | 0.95743 | 0.96883 |
| 2848 | 0.96718 | 0.95785 | 0.96937 |
| 2847 | 0.96733 | 0.9583  | 0.96986 |
| 2846 | 0.96747 | 0.95872 | 0.97023 |

|      |         |         |         |
|------|---------|---------|---------|
| 2845 | 0.96763 | 0.95909 | 0.97049 |
| 2844 | 0.96779 | 0.95943 | 0.97071 |
| 2843 | 0.96795 | 0.95976 | 0.97093 |
| 2842 | 0.96811 | 0.96009 | 0.97116 |
| 2841 | 0.96827 | 0.96042 | 0.9714  |
| 2840 | 0.96843 | 0.96074 | 0.97166 |
| 2839 | 0.96859 | 0.96103 | 0.97195 |
| 2838 | 0.96876 | 0.96127 | 0.97223 |
| 2837 | 0.96892 | 0.96148 | 0.97247 |
| 2836 | 0.96909 | 0.96165 | 0.97269 |
| 2835 | 0.96924 | 0.96182 | 0.97289 |
| 2834 | 0.9694  | 0.962   | 0.97308 |
| 2833 | 0.96954 | 0.96219 | 0.97325 |
| 2832 | 0.96968 | 0.96238 | 0.97339 |
| 2831 | 0.96981 | 0.96257 | 0.97349 |
| 2830 | 0.96994 | 0.96272 | 0.97357 |
| 2829 | 0.97006 | 0.96285 | 0.97364 |
| 2828 | 0.97017 | 0.96294 | 0.97369 |
| 2827 | 0.97028 | 0.96303 | 0.97374 |
| 2826 | 0.97038 | 0.96313 | 0.97382 |
| 2825 | 0.97047 | 0.96326 | 0.97392 |
| 2824 | 0.97055 | 0.96337 | 0.97409 |
| 2823 | 0.97063 | 0.96346 | 0.97432 |
| 2822 | 0.97071 | 0.96351 | 0.97459 |
| 2821 | 0.97079 | 0.96357 | 0.97481 |
| 2820 | 0.97086 | 0.96366 | 0.97491 |
| 2819 | 0.97093 | 0.96379 | 0.97491 |
| 2818 | 0.971   | 0.96392 | 0.97489 |
| 2817 | 0.97107 | 0.96404 | 0.97493 |
| 2816 | 0.97114 | 0.96412 | 0.97506 |
| 2815 | 0.9712  | 0.96419 | 0.97528 |
| 2814 | 0.97127 | 0.96425 | 0.97553 |
| 2813 | 0.97134 | 0.96431 | 0.97578 |
| 2812 | 0.97141 | 0.96441 | 0.97598 |
| 2811 | 0.97148 | 0.96454 | 0.97613 |
| 2810 | 0.97155 | 0.96468 | 0.97624 |
| 2809 | 0.97162 | 0.9648  | 0.97629 |
| 2808 | 0.97169 | 0.96487 | 0.97626 |
| 2807 | 0.97176 | 0.96492 | 0.97621 |
| 2806 | 0.97183 | 0.965   | 0.97621 |
| 2805 | 0.9719  | 0.96511 | 0.97631 |
| 2804 | 0.97197 | 0.96525 | 0.97649 |
| 2803 | 0.97203 | 0.96538 | 0.97668 |

|      |         |         |         |
|------|---------|---------|---------|
| 2802 | 0.9721  | 0.96548 | 0.97681 |
| 2801 | 0.97216 | 0.96556 | 0.97687 |
| 2800 | 0.97222 | 0.96566 | 0.9769  |
| 2799 | 0.97228 | 0.96576 | 0.97698 |
| 2798 | 0.97234 | 0.96586 | 0.97711 |
| 2797 | 0.97239 | 0.96592 | 0.97726 |
| 2796 | 0.97245 | 0.96593 | 0.97736 |
| 2795 | 0.9725  | 0.96593 | 0.97739 |
| 2794 | 0.97255 | 0.96593 | 0.97741 |
| 2793 | 0.97259 | 0.96597 | 0.97749 |
| 2792 | 0.97263 | 0.96604 | 0.97762 |
| 2791 | 0.97267 | 0.96614 | 0.97776 |
| 2790 | 0.97271 | 0.96628 | 0.97788 |
| 2789 | 0.97275 | 0.96643 | 0.978   |
| 2788 | 0.97279 | 0.96656 | 0.97815 |
| 2787 | 0.97283 | 0.96665 | 0.97831 |
| 2786 | 0.97286 | 0.96671 | 0.97846 |
| 2785 | 0.97289 | 0.96675 | 0.97857 |
| 2784 | 0.97293 | 0.96678 | 0.97864 |
| 2783 | 0.97296 | 0.96682 | 0.97873 |
| 2782 | 0.97299 | 0.96688 | 0.97883 |
| 2781 | 0.97302 | 0.96697 | 0.97893 |
| 2780 | 0.97305 | 0.9671  | 0.97901 |
| 2779 | 0.97309 | 0.96722 | 0.97906 |
| 2778 | 0.97312 | 0.96733 | 0.97913 |
| 2777 | 0.97315 | 0.96741 | 0.97926 |
| 2776 | 0.97319 | 0.96747 | 0.97941 |
| 2775 | 0.97322 | 0.96752 | 0.97957 |
| 2774 | 0.97325 | 0.96757 | 0.97968 |
| 2773 | 0.97328 | 0.96761 | 0.97972 |
| 2772 | 0.97331 | 0.96764 | 0.9797  |
| 2771 | 0.97334 | 0.96767 | 0.97968 |
| 2770 | 0.97337 | 0.96773 | 0.97971 |
| 2769 | 0.97341 | 0.96781 | 0.97983 |
| 2768 | 0.97345 | 0.9679  | 0.97998 |
| 2767 | 0.97349 | 0.96799 | 0.98009 |
| 2766 | 0.97352 | 0.96807 | 0.98013 |
| 2765 | 0.97356 | 0.96813 | 0.98012 |
| 2764 | 0.97361 | 0.96814 | 0.9801  |
| 2763 | 0.97365 | 0.96814 | 0.98008 |
| 2762 | 0.9737  | 0.96817 | 0.98007 |
| 2761 | 0.97374 | 0.96824 | 0.98006 |
| 2760 | 0.97378 | 0.96833 | 0.98004 |

|      |         |         |         |
|------|---------|---------|---------|
| 2759 | 0.97382 | 0.96842 | 0.98002 |
| 2758 | 0.97385 | 0.96848 | 0.98    |
| 2757 | 0.97388 | 0.96852 | 0.98    |
| 2756 | 0.97391 | 0.96855 | 0.98004 |
| 2755 | 0.97393 | 0.96856 | 0.98012 |
| 2754 | 0.97396 | 0.96857 | 0.98024 |
| 2753 | 0.97399 | 0.96857 | 0.98037 |
| 2752 | 0.97403 | 0.96856 | 0.98049 |
| 2751 | 0.97406 | 0.96856 | 0.98057 |
| 2750 | 0.97409 | 0.96859 | 0.98059 |
| 2749 | 0.97413 | 0.96866 | 0.98054 |
| 2748 | 0.97416 | 0.96873 | 0.98046 |
| 2747 | 0.97419 | 0.96875 | 0.98039 |
| 2746 | 0.97421 | 0.9687  | 0.98036 |
| 2745 | 0.97424 | 0.96863 | 0.98033 |
| 2744 | 0.97428 | 0.96859 | 0.98029 |
| 2743 | 0.97431 | 0.96859 | 0.98024 |
| 2742 | 0.97434 | 0.96859 | 0.98024 |
| 2741 | 0.97437 | 0.96856 | 0.98029 |
| 2740 | 0.97439 | 0.96853 | 0.98036 |
| 2739 | 0.97441 | 0.96854 | 0.98037 |
| 2738 | 0.97443 | 0.96861 | 0.9803  |
| 2737 | 0.97446 | 0.9687  | 0.98021 |
| 2736 | 0.97448 | 0.96876 | 0.98014 |
| 2735 | 0.97451 | 0.96878 | 0.98014 |
| 2734 | 0.97454 | 0.96879 | 0.9802  |
| 2733 | 0.97457 | 0.9688  | 0.98028 |
| 2732 | 0.97459 | 0.96881 | 0.98039 |
| 2731 | 0.97463 | 0.9688  | 0.98048 |
| 2730 | 0.97466 | 0.96882 | 0.98056 |
| 2729 | 0.9747  | 0.96887 | 0.98062 |
| 2728 | 0.97474 | 0.96894 | 0.98068 |
| 2727 | 0.97478 | 0.96899 | 0.98073 |
| 2726 | 0.97481 | 0.96901 | 0.98076 |
| 2725 | 0.97485 | 0.96902 | 0.98078 |
| 2724 | 0.97488 | 0.96903 | 0.98081 |
| 2723 | 0.97491 | 0.96908 | 0.98088 |
| 2722 | 0.97494 | 0.96917 | 0.98096 |
| 2721 | 0.97498 | 0.96927 | 0.981   |
| 2720 | 0.97501 | 0.96935 | 0.98101 |
| 2719 | 0.97504 | 0.9694  | 0.98098 |
| 2718 | 0.97507 | 0.96942 | 0.98093 |
| 2717 | 0.9751  | 0.96943 | 0.98091 |

|      |         |         |         |
|------|---------|---------|---------|
| 2716 | 0.97513 | 0.96945 | 0.98095 |
| 2715 | 0.97516 | 0.96947 | 0.98104 |
| 2714 | 0.97518 | 0.96951 | 0.98118 |
| 2713 | 0.97521 | 0.96956 | 0.98133 |
| 2712 | 0.97524 | 0.96961 | 0.98145 |
| 2711 | 0.97526 | 0.96966 | 0.98153 |
| 2710 | 0.97528 | 0.96968 | 0.98158 |
| 2709 | 0.9753  | 0.96968 | 0.98165 |
| 2708 | 0.97532 | 0.96969 | 0.98173 |
| 2707 | 0.97533 | 0.96974 | 0.9818  |
| 2706 | 0.97535 | 0.96983 | 0.98183 |
| 2705 | 0.97537 | 0.96992 | 0.9818  |
| 2704 | 0.97539 | 0.96999 | 0.98175 |
| 2703 | 0.97542 | 0.97004 | 0.98169 |
| 2702 | 0.97544 | 0.97009 | 0.98163 |
| 2701 | 0.97546 | 0.97013 | 0.98162 |
| 2700 | 0.97549 | 0.97017 | 0.9817  |
| 2699 | 0.97551 | 0.97019 | 0.98187 |
| 2698 | 0.97553 | 0.97023 | 0.98207 |
| 2697 | 0.97556 | 0.97027 | 0.98222 |
| 2696 | 0.97558 | 0.97033 | 0.98231 |
| 2695 | 0.9756  | 0.97039 | 0.98239 |
| 2694 | 0.97562 | 0.97045 | 0.98247 |
| 2693 | 0.97563 | 0.9705  | 0.98252 |
| 2692 | 0.97565 | 0.97054 | 0.98254 |
| 2691 | 0.97567 | 0.97057 | 0.98256 |
| 2690 | 0.97569 | 0.97058 | 0.9826  |
| 2689 | 0.97571 | 0.97058 | 0.98265 |
| 2688 | 0.97574 | 0.97061 | 0.98268 |
| 2687 | 0.97576 | 0.97068 | 0.9827  |
| 2686 | 0.97579 | 0.97076 | 0.98275 |
| 2685 | 0.97581 | 0.97083 | 0.98285 |
| 2684 | 0.97584 | 0.97086 | 0.98298 |
| 2683 | 0.97586 | 0.97089 | 0.98314 |
| 2682 | 0.97588 | 0.97095 | 0.98327 |
| 2681 | 0.97591 | 0.97104 | 0.98335 |
| 2680 | 0.97593 | 0.97111 | 0.98343 |
| 2679 | 0.97595 | 0.97113 | 0.98352 |
| 2678 | 0.97597 | 0.97112 | 0.98361 |
| 2677 | 0.97598 | 0.97111 | 0.98366 |
| 2676 | 0.97599 | 0.97114 | 0.98362 |
| 2675 | 0.976   | 0.97119 | 0.98355 |
| 2674 | 0.97601 | 0.97126 | 0.98354 |



|      |         |         |         |
|------|---------|---------|---------|
| 2673 | 0.97602 | 0.97132 | 0.9836  |
| 2672 | 0.97603 | 0.97137 | 0.98369 |
| 2671 | 0.97603 | 0.97142 | 0.98373 |
| 2670 | 0.97603 | 0.97147 | 0.98373 |
| 2669 | 0.97604 | 0.9715  | 0.98372 |
| 2668 | 0.97604 | 0.97149 | 0.98371 |
| 2667 | 0.97604 | 0.97147 | 0.98372 |
| 2666 | 0.97604 | 0.97146 | 0.98377 |
| 2665 | 0.97604 | 0.97149 | 0.98386 |
| 2664 | 0.97604 | 0.97153 | 0.98394 |
| 2663 | 0.97603 | 0.97155 | 0.98398 |
| 2662 | 0.97603 | 0.97153 | 0.984   |
| 2661 | 0.97602 | 0.97152 | 0.98401 |
| 2660 | 0.976   | 0.97153 | 0.98403 |
| 2659 | 0.97599 | 0.97156 | 0.98403 |
| 2658 | 0.97597 | 0.9716  | 0.98403 |
| 2657 | 0.97595 | 0.97163 | 0.98406 |
| 2656 | 0.97594 | 0.97166 | 0.98414 |
| 2655 | 0.97592 | 0.9717  | 0.98423 |
| 2654 | 0.9759  | 0.97175 | 0.98427 |
| 2653 | 0.97589 | 0.9718  | 0.98427 |
| 2652 | 0.97587 | 0.97181 | 0.98424 |
| 2651 | 0.97586 | 0.97178 | 0.98421 |
| 2650 | 0.97585 | 0.97172 | 0.98422 |
| 2649 | 0.97584 | 0.9717  | 0.98428 |
| 2648 | 0.97583 | 0.97173 | 0.98438 |
| 2647 | 0.97582 | 0.97177 | 0.9845  |
| 2646 | 0.97581 | 0.97175 | 0.98459 |
| 2645 | 0.97581 | 0.97171 | 0.98463 |
| 2644 | 0.9758  | 0.97169 | 0.98463 |
| 2643 | 0.97579 | 0.97174 | 0.98462 |
| 2642 | 0.97579 | 0.97181 | 0.9846  |
| 2641 | 0.97578 | 0.97186 | 0.98459 |
| 2640 | 0.97578 | 0.97185 | 0.98461 |
| 2639 | 0.97579 | 0.97178 | 0.98466 |
| 2638 | 0.97579 | 0.97171 | 0.98474 |
| 2637 | 0.9758  | 0.97168 | 0.98483 |
| 2636 | 0.97581 | 0.97171 | 0.98491 |
| 2635 | 0.97582 | 0.97175 | 0.98492 |
| 2634 | 0.97583 | 0.97177 | 0.98485 |
| 2633 | 0.97585 | 0.97177 | 0.98472 |
| 2632 | 0.97586 | 0.97177 | 0.9846  |
| 2631 | 0.97588 | 0.97177 | 0.98451 |

|      |         |         |         |
|------|---------|---------|---------|
| 2630 | 0.9759  | 0.97176 | 0.98449 |
| 2629 | 0.97592 | 0.97172 | 0.98452 |
| 2628 | 0.97594 | 0.97167 | 0.98461 |
| 2627 | 0.97596 | 0.97164 | 0.98473 |
| 2626 | 0.97599 | 0.97159 | 0.9848  |
| 2625 | 0.97602 | 0.97154 | 0.98479 |
| 2624 | 0.97605 | 0.97149 | 0.98473 |
| 2623 | 0.97607 | 0.97148 | 0.98469 |
| 2622 | 0.9761  | 0.9715  | 0.98466 |
| 2621 | 0.97613 | 0.97152 | 0.98461 |
| 2620 | 0.97616 | 0.97154 | 0.98454 |
| 2619 | 0.97618 | 0.97156 | 0.9845  |
| 2618 | 0.9762  | 0.97158 | 0.98451 |
| 2617 | 0.97623 | 0.9716  | 0.98459 |
| 2616 | 0.97625 | 0.97165 | 0.98468 |
| 2615 | 0.97629 | 0.97172 | 0.98472 |
| 2614 | 0.97632 | 0.9718  | 0.98469 |
| 2613 | 0.97635 | 0.97185 | 0.98464 |
| 2612 | 0.97638 | 0.97186 | 0.98465 |
| 2611 | 0.97641 | 0.97184 | 0.98472 |
| 2610 | 0.97644 | 0.97179 | 0.98481 |
| 2609 | 0.97647 | 0.97173 | 0.98485 |
| 2608 | 0.9765  | 0.97168 | 0.98486 |
| 2607 | 0.97654 | 0.97164 | 0.98487 |
| 2606 | 0.97657 | 0.97165 | 0.98492 |
| 2605 | 0.9766  | 0.9717  | 0.98502 |
| 2604 | 0.97663 | 0.97175 | 0.98513 |
| 2603 | 0.97666 | 0.97179 | 0.98515 |
| 2602 | 0.97669 | 0.97179 | 0.98506 |
| 2601 | 0.97671 | 0.97177 | 0.98492 |
| 2600 | 0.97674 | 0.97175 | 0.98479 |
| 2599 | 0.97676 | 0.97176 | 0.98468 |
| 2598 | 0.97677 | 0.97179 | 0.98458 |
| 2597 | 0.97678 | 0.97179 | 0.98455 |
| 2596 | 0.97679 | 0.97175 | 0.98464 |
| 2595 | 0.97681 | 0.97169 | 0.98485 |
| 2594 | 0.97682 | 0.97165 | 0.98505 |
| 2593 | 0.97684 | 0.97165 | 0.98512 |
| 2592 | 0.97686 | 0.97165 | 0.98509 |
| 2591 | 0.97687 | 0.97166 | 0.98507 |
| 2590 | 0.97689 | 0.97168 | 0.98513 |
| 2589 | 0.9769  | 0.97169 | 0.98519 |
| 2588 | 0.97691 | 0.97171 | 0.98519 |

|      |         |         |         |
|------|---------|---------|---------|
| 2587 | 0.97692 | 0.97174 | 0.98514 |
| 2586 | 0.97693 | 0.97178 | 0.98509 |
| 2585 | 0.97694 | 0.97181 | 0.98503 |
| 2584 | 0.97694 | 0.97179 | 0.98502 |
| 2583 | 0.97694 | 0.97171 | 0.98509 |
| 2582 | 0.97694 | 0.97165 | 0.9852  |
| 2581 | 0.97693 | 0.97166 | 0.98528 |
| 2580 | 0.97693 | 0.97174 | 0.98527 |
| 2579 | 0.97692 | 0.97182 | 0.9852  |
| 2578 | 0.97692 | 0.97189 | 0.98514 |
| 2577 | 0.97692 | 0.97198 | 0.98508 |
| 2576 | 0.97692 | 0.9721  | 0.98503 |
| 2575 | 0.97692 | 0.97216 | 0.98498 |
| 2574 | 0.97692 | 0.97211 | 0.98496 |
| 2573 | 0.97692 | 0.97199 | 0.98502 |
| 2572 | 0.97692 | 0.97188 | 0.98521 |
| 2571 | 0.97693 | 0.97184 | 0.98544 |
| 2570 | 0.97694 | 0.97187 | 0.98558 |
| 2569 | 0.97695 | 0.97192 | 0.98557 |
| 2568 | 0.97697 | 0.97196 | 0.98551 |
| 2567 | 0.97699 | 0.97198 | 0.98552 |
| 2566 | 0.97701 | 0.97199 | 0.98558 |
| 2565 | 0.97703 | 0.97197 | 0.98557 |
| 2564 | 0.97705 | 0.97195 | 0.98546 |
| 2563 | 0.97706 | 0.97194 | 0.98538 |
| 2562 | 0.97708 | 0.97195 | 0.98545 |
| 2561 | 0.9771  | 0.97199 | 0.98563 |
| 2560 | 0.97712 | 0.97204 | 0.98577 |
| 2559 | 0.97714 | 0.97209 | 0.98573 |
| 2558 | 0.97716 | 0.97211 | 0.98556 |
| 2557 | 0.97718 | 0.97211 | 0.98538 |
| 2556 | 0.97721 | 0.97209 | 0.98524 |
| 2555 | 0.97723 | 0.97208 | 0.9852  |
| 2554 | 0.97726 | 0.97208 | 0.98525 |
| 2553 | 0.97728 | 0.9721  | 0.98538 |
| 2552 | 0.9773  | 0.97214 | 0.98549 |
| 2551 | 0.97732 | 0.97219 | 0.9855  |
| 2550 | 0.97733 | 0.97219 | 0.98537 |
| 2549 | 0.97734 | 0.97214 | 0.98515 |
| 2548 | 0.97735 | 0.97205 | 0.98497 |
| 2547 | 0.97736 | 0.97198 | 0.98494 |
| 2546 | 0.97737 | 0.97197 | 0.98505 |
| 2545 | 0.97738 | 0.97204 | 0.98521 |

|      |         |         |         |
|------|---------|---------|---------|
| 2544 | 0.97738 | 0.97214 | 0.98533 |
| 2543 | 0.97739 | 0.97221 | 0.98537 |
| 2542 | 0.97739 | 0.97221 | 0.98537 |
| 2541 | 0.9774  | 0.97215 | 0.98536 |
| 2540 | 0.9774  | 0.97211 | 0.98537 |
| 2539 | 0.97741 | 0.97213 | 0.9854  |
| 2538 | 0.97742 | 0.97219 | 0.98543 |
| 2537 | 0.97744 | 0.97223 | 0.98545 |
| 2536 | 0.97745 | 0.97221 | 0.98544 |
| 2535 | 0.97745 | 0.97214 | 0.98545 |
| 2534 | 0.97745 | 0.97209 | 0.98551 |
| 2533 | 0.97746 | 0.97211 | 0.9856  |
| 2532 | 0.97747 | 0.9722  | 0.98571 |
| 2531 | 0.97748 | 0.9723  | 0.98587 |
| 2530 | 0.97749 | 0.97236 | 0.98607 |
| 2529 | 0.9775  | 0.97235 | 0.98622 |
| 2528 | 0.97752 | 0.97228 | 0.98624 |
| 2527 | 0.97754 | 0.97221 | 0.98612 |
| 2526 | 0.97756 | 0.97217 | 0.98594 |
| 2525 | 0.97757 | 0.97219 | 0.98578 |
| 2524 | 0.97759 | 0.97222 | 0.9857  |
| 2523 | 0.97761 | 0.97226 | 0.98567 |
| 2522 | 0.97763 | 0.97229 | 0.98563 |
| 2521 | 0.97765 | 0.97231 | 0.98556 |
| 2520 | 0.97767 | 0.97231 | 0.98553 |
| 2519 | 0.97768 | 0.97228 | 0.98559 |
| 2518 | 0.97769 | 0.97223 | 0.98572 |
| 2517 | 0.9777  | 0.9722  | 0.98584 |
| 2516 | 0.97771 | 0.97224 | 0.9859  |
| 2515 | 0.97772 | 0.97235 | 0.98593 |
| 2514 | 0.97774 | 0.97246 | 0.98596 |
| 2513 | 0.97776 | 0.97254 | 0.98595 |
| 2512 | 0.97778 | 0.97259 | 0.98587 |
| 2511 | 0.9778  | 0.97261 | 0.98571 |
| 2510 | 0.97783 | 0.97258 | 0.9856  |
| 2509 | 0.97785 | 0.9725  | 0.98563 |
| 2508 | 0.97787 | 0.97244 | 0.98578 |
| 2507 | 0.97789 | 0.97243 | 0.98596 |
| 2506 | 0.9779  | 0.97245 | 0.98608 |
| 2505 | 0.97791 | 0.9725  | 0.98613 |
| 2504 | 0.97791 | 0.97255 | 0.98614 |
| 2503 | 0.97791 | 0.9726  | 0.98612 |
| 2502 | 0.97791 | 0.97258 | 0.98609 |

|      |         |         |         |
|------|---------|---------|---------|
| 2501 | 0.97791 | 0.97253 | 0.98611 |
| 2500 | 0.97791 | 0.97251 | 0.98622 |
| 2499 | 0.97791 | 0.97259 | 0.98644 |
| 2498 | 0.97791 | 0.97276 | 0.98667 |
| 2497 | 0.97792 | 0.97293 | 0.98678 |
| 2496 | 0.97793 | 0.97302 | 0.98672 |
| 2495 | 0.97795 | 0.97302 | 0.98655 |
| 2494 | 0.97796 | 0.97295 | 0.98638 |
| 2493 | 0.97798 | 0.97289 | 0.98625 |
| 2492 | 0.97799 | 0.97288 | 0.98615 |
| 2491 | 0.97801 | 0.97292 | 0.9861  |
| 2490 | 0.97802 | 0.97296 | 0.98614 |
| 2489 | 0.97804 | 0.97295 | 0.98622 |
| 2488 | 0.97805 | 0.97288 | 0.9863  |
| 2487 | 0.97807 | 0.97281 | 0.98637 |
| 2486 | 0.97808 | 0.97281 | 0.98645 |
| 2485 | 0.9781  | 0.97288 | 0.98652 |
| 2484 | 0.97811 | 0.97298 | 0.98656 |
| 2483 | 0.97812 | 0.9731  | 0.9866  |
| 2482 | 0.97812 | 0.9732  | 0.98665 |
| 2481 | 0.97812 | 0.97321 | 0.98669 |
| 2480 | 0.97813 | 0.97314 | 0.98669 |
| 2479 | 0.97814 | 0.97308 | 0.98662 |
| 2478 | 0.97814 | 0.97308 | 0.9865  |
| 2477 | 0.97815 | 0.97312 | 0.9864  |
| 2476 | 0.97815 | 0.97314 | 0.9864  |
| 2475 | 0.97816 | 0.97315 | 0.98657 |
| 2474 | 0.97816 | 0.97317 | 0.98686 |
| 2473 | 0.97817 | 0.97317 | 0.98715 |
| 2472 | 0.97818 | 0.97314 | 0.98732 |
| 2471 | 0.97818 | 0.97309 | 0.98732 |
| 2470 | 0.97818 | 0.97309 | 0.98725 |
| 2469 | 0.97819 | 0.97316 | 0.98722 |
| 2468 | 0.9782  | 0.97327 | 0.98724 |
| 2467 | 0.97821 | 0.97333 | 0.98728 |
| 2466 | 0.97823 | 0.9733  | 0.98732 |
| 2465 | 0.97824 | 0.97322 | 0.98739 |
| 2464 | 0.97825 | 0.97319 | 0.98745 |
| 2463 | 0.97826 | 0.97323 | 0.98746 |
| 2462 | 0.97827 | 0.9733  | 0.98741 |
| 2461 | 0.97828 | 0.97336 | 0.98736 |
| 2460 | 0.97828 | 0.9734  | 0.98731 |
| 2459 | 0.97828 | 0.97343 | 0.98728 |

|      |         |         |         |
|------|---------|---------|---------|
| 2458 | 0.97828 | 0.97345 | 0.98727 |
| 2457 | 0.97829 | 0.97344 | 0.9873  |
| 2456 | 0.97829 | 0.97342 | 0.98728 |
| 2455 | 0.9783  | 0.97343 | 0.98719 |
| 2454 | 0.97832 | 0.97351 | 0.98703 |
| 2453 | 0.97833 | 0.97364 | 0.98695 |
| 2452 | 0.97835 | 0.97376 | 0.98706 |
| 2451 | 0.97836 | 0.97383 | 0.98732 |
| 2450 | 0.97838 | 0.97385 | 0.98753 |
| 2449 | 0.97839 | 0.97384 | 0.98757 |
| 2448 | 0.97842 | 0.97381 | 0.98744 |
| 2447 | 0.97844 | 0.97381 | 0.98727 |
| 2446 | 0.97846 | 0.97384 | 0.98715 |
| 2445 | 0.97848 | 0.97389 | 0.9871  |
| 2444 | 0.97849 | 0.97391 | 0.98713 |
| 2443 | 0.97851 | 0.97389 | 0.9872  |
| 2442 | 0.97853 | 0.97387 | 0.98729 |
| 2441 | 0.97855 | 0.97389 | 0.98735 |
| 2440 | 0.97858 | 0.97398 | 0.98733 |
| 2439 | 0.97861 | 0.9741  | 0.98726 |
| 2438 | 0.97864 | 0.97421 | 0.98718 |
| 2437 | 0.97867 | 0.97426 | 0.98713 |
| 2436 | 0.97869 | 0.97421 | 0.98713 |
| 2435 | 0.97871 | 0.9741  | 0.98722 |
| 2434 | 0.97873 | 0.97398 | 0.9874  |
| 2433 | 0.97875 | 0.97389 | 0.98762 |
| 2432 | 0.97877 | 0.97385 | 0.98776 |
| 2431 | 0.97879 | 0.97384 | 0.98777 |
| 2430 | 0.97881 | 0.97385 | 0.98773 |
| 2429 | 0.97882 | 0.97386 | 0.98774 |
| 2428 | 0.97883 | 0.97388 | 0.98781 |
| 2427 | 0.97885 | 0.97394 | 0.98783 |
| 2426 | 0.97886 | 0.97404 | 0.98775 |
| 2425 | 0.97888 | 0.97416 | 0.98767 |
| 2424 | 0.97889 | 0.97424 | 0.9877  |
| 2423 | 0.97891 | 0.97426 | 0.98787 |
| 2422 | 0.97893 | 0.97427 | 0.98809 |
| 2421 | 0.97894 | 0.9743  | 0.98823 |
| 2420 | 0.97896 | 0.97437 | 0.98825 |
| 2419 | 0.97897 | 0.97442 | 0.98817 |
| 2418 | 0.97899 | 0.97441 | 0.98807 |
| 2417 | 0.979   | 0.97437 | 0.988   |
| 2416 | 0.97902 | 0.97433 | 0.98799 |

|      |         |         |         |
|------|---------|---------|---------|
| 2415 | 0.97903 | 0.97434 | 0.98799 |
| 2414 | 0.97905 | 0.97441 | 0.98793 |
| 2413 | 0.97907 | 0.97449 | 0.98779 |
| 2412 | 0.97908 | 0.97457 | 0.98762 |
| 2411 | 0.97909 | 0.97461 | 0.98756 |
| 2410 | 0.97911 | 0.97462 | 0.98765 |
| 2409 | 0.97912 | 0.97459 | 0.98786 |
| 2408 | 0.97914 | 0.97454 | 0.98813 |
| 2407 | 0.97916 | 0.97452 | 0.98835 |
| 2406 | 0.97918 | 0.97454 | 0.98843 |
| 2405 | 0.97919 | 0.97459 | 0.98834 |
| 2404 | 0.9792  | 0.97463 | 0.98818 |
| 2403 | 0.97921 | 0.97466 | 0.98805 |
| 2402 | 0.97922 | 0.97469 | 0.98798 |
| 2401 | 0.97923 | 0.97472 | 0.98794 |
| 2400 | 0.97923 | 0.97474 | 0.98795 |
| 2399 | 0.97924 | 0.97473 | 0.98801 |
| 2398 | 0.97925 | 0.9747  | 0.98809 |
| 2397 | 0.97925 | 0.97468 | 0.98812 |
| 2396 | 0.97926 | 0.97465 | 0.98809 |
| 2395 | 0.97927 | 0.97462 | 0.98803 |
| 2394 | 0.97929 | 0.97459 | 0.98801 |
| 2393 | 0.97932 | 0.97459 | 0.98807 |
| 2392 | 0.97935 | 0.97461 | 0.98815 |
| 2391 | 0.97937 | 0.97464 | 0.98818 |
| 2390 | 0.97938 | 0.97461 | 0.98815 |
| 2389 | 0.97937 | 0.97452 | 0.98809 |
| 2388 | 0.97935 | 0.9744  | 0.98801 |
| 2387 | 0.97932 | 0.97431 | 0.98791 |
| 2386 | 0.97931 | 0.97426 | 0.98774 |
| 2385 | 0.9793  | 0.97423 | 0.98753 |
| 2384 | 0.97931 | 0.97424 | 0.98736 |
| 2383 | 0.97932 | 0.97431 | 0.98735 |
| 2382 | 0.97933 | 0.97449 | 0.98755 |
| 2381 | 0.97933 | 0.9747  | 0.98791 |
| 2380 | 0.97932 | 0.97485 | 0.98828 |
| 2379 | 0.97931 | 0.97486 | 0.98852 |
| 2378 | 0.97929 | 0.97477 | 0.98854 |
| 2377 | 0.97926 | 0.97465 | 0.98835 |
| 2376 | 0.97925 | 0.97461 | 0.98804 |
| 2375 | 0.97923 | 0.97469 | 0.98773 |
| 2374 | 0.97921 | 0.97486 | 0.98754 |
| 2373 | 0.9792  | 0.97497 | 0.98753 |

|      |         |         |         |
|------|---------|---------|---------|
| 2372 | 0.97918 | 0.97494 | 0.98768 |
| 2371 | 0.97916 | 0.97475 | 0.98789 |
| 2370 | 0.97913 | 0.97452 | 0.98804 |
| 2369 | 0.97911 | 0.97431 | 0.98809 |
| 2368 | 0.9791  | 0.97406 | 0.98812 |
| 2367 | 0.97908 | 0.97373 | 0.98826 |
| 2366 | 0.97905 | 0.97349 | 0.98849 |
| 2365 | 0.97902 | 0.97354 | 0.98858 |
| 2364 | 0.97898 | 0.9738  | 0.98829 |
| 2363 | 0.97896 | 0.97403 | 0.98768 |
| 2362 | 0.97895 | 0.97412 | 0.98717 |
| 2361 | 0.97894 | 0.97409 | 0.98702 |
| 2360 | 0.97893 | 0.97397 | 0.98701 |
| 2359 | 0.97891 | 0.97377 | 0.98692 |
| 2358 | 0.97889 | 0.97368 | 0.98697 |
| 2357 | 0.97886 | 0.97379 | 0.98734 |
| 2356 | 0.97883 | 0.97381 | 0.98771 |
| 2355 | 0.97879 | 0.97371 | 0.98776 |
| 2354 | 0.97875 | 0.97373 | 0.9876  |
| 2353 | 0.97872 | 0.97381 | 0.98731 |
| 2352 | 0.9787  | 0.97369 | 0.9869  |
| 2351 | 0.97867 | 0.97348 | 0.98663 |
| 2350 | 0.97863 | 0.97345 | 0.98667 |
| 2349 | 0.97859 | 0.97351 | 0.98669 |
| 2348 | 0.97854 | 0.97345 | 0.98638 |
| 2347 | 0.97848 | 0.97331 | 0.98608 |
| 2346 | 0.97843 | 0.97323 | 0.98622 |
| 2345 | 0.9784  | 0.97304 | 0.98644 |
| 2344 | 0.97836 | 0.97281 | 0.98623 |
| 2343 | 0.97833 | 0.97292 | 0.98579 |
| 2342 | 0.97829 | 0.97326 | 0.98548 |
| 2341 | 0.97825 | 0.9735  | 0.98535 |
| 2340 | 0.97821 | 0.97357 | 0.98538 |
| 2339 | 0.97818 | 0.97356 | 0.98557 |
| 2338 | 0.97816 | 0.97346 | 0.98584 |
| 2337 | 0.97815 | 0.97318 | 0.98594 |
| 2336 | 0.97814 | 0.97275 | 0.98578 |
| 2335 | 0.97813 | 0.97233 | 0.98546 |
| 2334 | 0.9781  | 0.9721  | 0.98515 |
| 2333 | 0.97807 | 0.9721  | 0.98491 |
| 2332 | 0.97802 | 0.97227 | 0.98473 |
| 2331 | 0.97798 | 0.97256 | 0.98467 |
| 2330 | 0.97793 | 0.97285 | 0.98481 |



|      |         |         |         |
|------|---------|---------|---------|
| 2329 | 0.97789 | 0.97299 | 0.98514 |
| 2328 | 0.97786 | 0.97289 | 0.98551 |
| 2327 | 0.97785 | 0.97263 | 0.98574 |
| 2326 | 0.97784 | 0.97236 | 0.98573 |
| 2325 | 0.97783 | 0.97213 | 0.98552 |
| 2324 | 0.97783 | 0.97194 | 0.98524 |
| 2323 | 0.97782 | 0.9718  | 0.98505 |
| 2322 | 0.97781 | 0.97176 | 0.98502 |
| 2321 | 0.9778  | 0.97188 | 0.9851  |
| 2320 | 0.9778  | 0.97212 | 0.98526 |
| 2319 | 0.9778  | 0.97239 | 0.98549 |
| 2318 | 0.97781 | 0.97259 | 0.98574 |
| 2317 | 0.97781 | 0.97273 | 0.98592 |
| 2316 | 0.97782 | 0.97283 | 0.98598 |
| 2315 | 0.97784 | 0.97288 | 0.98595 |
| 2314 | 0.97787 | 0.97286 | 0.98588 |
| 2313 | 0.97791 | 0.97279 | 0.98571 |
| 2312 | 0.97794 | 0.97271 | 0.98547 |
| 2311 | 0.97795 | 0.97268 | 0.98524 |
| 2310 | 0.97795 | 0.97269 | 0.98516 |
| 2309 | 0.97794 | 0.97271 | 0.98528 |
| 2308 | 0.97793 | 0.97275 | 0.98556 |
| 2307 | 0.97792 | 0.97282 | 0.98595 |
| 2306 | 0.97792 | 0.97295 | 0.98637 |
| 2305 | 0.97792 | 0.9731  | 0.98668 |
| 2304 | 0.97792 | 0.9732  | 0.98681 |
| 2303 | 0.97792 | 0.97325 | 0.98677 |
| 2302 | 0.9779  | 0.97329 | 0.98668 |
| 2301 | 0.97787 | 0.97335 | 0.98665 |
| 2300 | 0.97784 | 0.97344 | 0.98662 |
| 2299 | 0.97781 | 0.97349 | 0.98653 |
| 2298 | 0.97779 | 0.97347 | 0.98636 |
| 2297 | 0.9778  | 0.97343 | 0.98627 |
| 2296 | 0.97782 | 0.97345 | 0.98634 |
| 2295 | 0.97785 | 0.97352 | 0.98652 |
| 2294 | 0.97787 | 0.9736  | 0.98664 |
| 2293 | 0.97788 | 0.97364 | 0.9866  |
| 2292 | 0.97789 | 0.97363 | 0.98647 |
| 2291 | 0.97789 | 0.9736  | 0.98644 |
| 2290 | 0.97789 | 0.97357 | 0.98661 |
| 2289 | 0.97789 | 0.97353 | 0.9869  |
| 2288 | 0.97789 | 0.97349 | 0.9871  |
| 2287 | 0.97789 | 0.97347 | 0.98708 |

|      |         |         |         |
|------|---------|---------|---------|
| 2286 | 0.97789 | 0.97345 | 0.98691 |
| 2285 | 0.9779  | 0.97342 | 0.98677 |
| 2284 | 0.9779  | 0.9734  | 0.98682 |
| 2283 | 0.97791 | 0.97342 | 0.98699 |
| 2282 | 0.97792 | 0.97348 | 0.98715 |
| 2281 | 0.97795 | 0.97354 | 0.98719 |
| 2280 | 0.97797 | 0.9736  | 0.98716 |
| 2279 | 0.978   | 0.97362 | 0.98709 |
| 2278 | 0.97803 | 0.97359 | 0.98701 |
| 2277 | 0.97805 | 0.9735  | 0.98694 |
| 2276 | 0.97806 | 0.97341 | 0.98691 |
| 2275 | 0.97807 | 0.97337 | 0.98694 |
| 2274 | 0.97808 | 0.97344 | 0.987   |
| 2273 | 0.9781  | 0.97356 | 0.98705 |
| 2272 | 0.97812 | 0.97364 | 0.98711 |
| 2271 | 0.97815 | 0.97365 | 0.98714 |
| 2270 | 0.97817 | 0.97364 | 0.9871  |
| 2269 | 0.97818 | 0.97363 | 0.98695 |
| 2268 | 0.97819 | 0.97361 | 0.98673 |
| 2267 | 0.9782  | 0.9735  | 0.98654 |
| 2266 | 0.97821 | 0.97332 | 0.98651 |
| 2265 | 0.97822 | 0.97313 | 0.98661 |
| 2264 | 0.97822 | 0.97297 | 0.98674 |
| 2263 | 0.97822 | 0.9728  | 0.9868  |
| 2262 | 0.97822 | 0.97261 | 0.98673 |
| 2261 | 0.97822 | 0.97246 | 0.98659 |
| 2260 | 0.97824 | 0.97244 | 0.9865  |
| 2259 | 0.97826 | 0.97248 | 0.9866  |
| 2258 | 0.97828 | 0.97249 | 0.98681 |
| 2257 | 0.97829 | 0.97246 | 0.98699 |
| 2256 | 0.97828 | 0.97249 | 0.98706 |
| 2255 | 0.97826 | 0.97264 | 0.98703 |
| 2254 | 0.97824 | 0.97282 | 0.98691 |
| 2253 | 0.97822 | 0.97285 | 0.98668 |
| 2252 | 0.9782  | 0.97269 | 0.98639 |
| 2251 | 0.97819 | 0.97248 | 0.98613 |
| 2250 | 0.97817 | 0.97236 | 0.98596 |
| 2249 | 0.97816 | 0.97232 | 0.98593 |
| 2248 | 0.97815 | 0.97231 | 0.98611 |
| 2247 | 0.97813 | 0.97233 | 0.98653 |
| 2246 | 0.97812 | 0.9724  | 0.98705 |
| 2245 | 0.97811 | 0.97249 | 0.98737 |
| 2244 | 0.97811 | 0.97255 | 0.98727 |

|      |         |         |         |
|------|---------|---------|---------|
| 2243 | 0.9781  | 0.97249 | 0.98687 |
| 2242 | 0.9781  | 0.9723  | 0.9865  |
| 2241 | 0.9781  | 0.97208 | 0.98639 |
| 2240 | 0.9781  | 0.97198 | 0.9865  |
| 2239 | 0.97811 | 0.97204 | 0.98661 |
| 2238 | 0.97811 | 0.97217 | 0.98658 |
| 2237 | 0.97812 | 0.97229 | 0.98648 |
| 2236 | 0.97812 | 0.97241 | 0.9864  |
| 2235 | 0.97813 | 0.97254 | 0.98639 |
| 2234 | 0.97814 | 0.97257 | 0.98636 |
| 2233 | 0.97814 | 0.97241 | 0.98626 |
| 2232 | 0.97815 | 0.97207 | 0.98613 |
| 2231 | 0.97816 | 0.97172 | 0.98604 |
| 2230 | 0.97816 | 0.97149 | 0.98599 |
| 2229 | 0.97817 | 0.97139 | 0.98593 |
| 2228 | 0.97817 | 0.97136 | 0.98578 |
| 2227 | 0.97817 | 0.97132 | 0.98562 |
| 2226 | 0.97817 | 0.97125 | 0.98554 |
| 2225 | 0.97817 | 0.97115 | 0.98563 |
| 2224 | 0.97818 | 0.97103 | 0.98586 |
| 2223 | 0.97819 | 0.971   | 0.98614 |
| 2222 | 0.9782  | 0.97114 | 0.98634 |
| 2221 | 0.97821 | 0.97139 | 0.98631 |
| 2220 | 0.97821 | 0.97157 | 0.98604 |
| 2219 | 0.97821 | 0.97158 | 0.98568 |
| 2218 | 0.97821 | 0.97148 | 0.98545 |
| 2217 | 0.97821 | 0.97138 | 0.98542 |
| 2216 | 0.97821 | 0.97132 | 0.98553 |
| 2215 | 0.97822 | 0.97127 | 0.98565 |
| 2214 | 0.97823 | 0.97117 | 0.98571 |
| 2213 | 0.97825 | 0.97106 | 0.98565 |
| 2212 | 0.97828 | 0.97101 | 0.9855  |
| 2211 | 0.9783  | 0.97101 | 0.98539 |
| 2210 | 0.9783  | 0.97098 | 0.98541 |
| 2209 | 0.97826 | 0.97089 | 0.98561 |
| 2208 | 0.9782  | 0.97078 | 0.98598 |
| 2207 | 0.97814 | 0.97072 | 0.98644 |
| 2206 | 0.97809 | 0.97077 | 0.98677 |
| 2205 | 0.97807 | 0.97087 | 0.98667 |
| 2204 | 0.97805 | 0.97098 | 0.98602 |
| 2203 | 0.97804 | 0.97103 | 0.98504 |
| 2202 | 0.97802 | 0.97093 | 0.98417 |
| 2201 | 0.978   | 0.97063 | 0.98376 |

|      |         |         |         |
|------|---------|---------|---------|
| 2200 | 0.97797 | 0.97029 | 0.98388 |
| 2199 | 0.97795 | 0.97015 | 0.98432 |
| 2198 | 0.97794 | 0.97027 | 0.98479 |
| 2197 | 0.97793 | 0.97051 | 0.98505 |
| 2196 | 0.97794 | 0.97069 | 0.98501 |
| 2195 | 0.97794 | 0.97073 | 0.98466 |
| 2194 | 0.97792 | 0.97061 | 0.9841  |
| 2193 | 0.9779  | 0.97034 | 0.98353 |
| 2192 | 0.97786 | 0.97005 | 0.98319 |
| 2191 | 0.97782 | 0.96984 | 0.9832  |
| 2190 | 0.97778 | 0.96971 | 0.98344 |
| 2189 | 0.97774 | 0.96965 | 0.9837  |
| 2188 | 0.9777  | 0.96965 | 0.98386 |
| 2187 | 0.97765 | 0.96972 | 0.984   |
| 2186 | 0.97759 | 0.96978 | 0.98422 |
| 2185 | 0.97751 | 0.96971 | 0.98452 |
| 2184 | 0.97741 | 0.9695  | 0.98475 |
| 2183 | 0.97732 | 0.96922 | 0.98483 |
| 2182 | 0.97724 | 0.96896 | 0.98481 |
| 2181 | 0.97716 | 0.96876 | 0.98482 |
| 2180 | 0.9771  | 0.96861 | 0.98485 |
| 2179 | 0.97706 | 0.96856 | 0.98484 |
| 2178 | 0.97702 | 0.96868 | 0.98476 |
| 2177 | 0.977   | 0.96896 | 0.98466 |
| 2176 | 0.97699 | 0.96925 | 0.98463 |
| 2175 | 0.97697 | 0.9694  | 0.9846  |
| 2174 | 0.97694 | 0.96936 | 0.98451 |
| 2173 | 0.9769  | 0.96919 | 0.98432 |
| 2172 | 0.97686 | 0.96897 | 0.98404 |
| 2171 | 0.97682 | 0.96872 | 0.9836  |
| 2170 | 0.97679 | 0.96847 | 0.98298 |
| 2169 | 0.97677 | 0.96833 | 0.98235 |
| 2168 | 0.97675 | 0.96839 | 0.982   |
| 2167 | 0.97674 | 0.96865 | 0.98204 |
| 2166 | 0.97673 | 0.9689  | 0.98231 |
| 2165 | 0.97673 | 0.96878 | 0.98254 |
| 2164 | 0.97675 | 0.96815 | 0.98259 |
| 2163 | 0.97678 | 0.96725 | 0.98249 |
| 2162 | 0.97681 | 0.96656 | 0.9824  |
| 2161 | 0.97684 | 0.96641 | 0.98244 |
| 2160 | 0.97687 | 0.96681 | 0.98264 |
| 2159 | 0.97691 | 0.96747 | 0.98289 |
| 2158 | 0.97695 | 0.96812 | 0.98302 |

|      |         |         |         |
|------|---------|---------|---------|
| 2157 | 0.97702 | 0.96864 | 0.98295 |
| 2156 | 0.97708 | 0.96905 | 0.98281 |
| 2155 | 0.97715 | 0.96932 | 0.98279 |
| 2154 | 0.9772  | 0.96941 | 0.98299 |
| 2153 | 0.97725 | 0.96929 | 0.98331 |
| 2152 | 0.9773  | 0.96908 | 0.98362 |
| 2151 | 0.97736 | 0.96893 | 0.98392 |
| 2150 | 0.97742 | 0.96888 | 0.98432 |
| 2149 | 0.9775  | 0.96889 | 0.98487 |
| 2148 | 0.97759 | 0.96894 | 0.98553 |
| 2147 | 0.97767 | 0.96912 | 0.9861  |
| 2146 | 0.97773 | 0.96945 | 0.98633 |
| 2145 | 0.97777 | 0.96986 | 0.9861  |
| 2144 | 0.97781 | 0.97022 | 0.98552 |
| 2143 | 0.97784 | 0.97046 | 0.9849  |
| 2142 | 0.97788 | 0.97053 | 0.98448 |
| 2141 | 0.97791 | 0.9704  | 0.98432 |
| 2140 | 0.97795 | 0.97014 | 0.98435 |
| 2139 | 0.97797 | 0.96987 | 0.9845  |
| 2138 | 0.97798 | 0.96971 | 0.98468 |
| 2137 | 0.97797 | 0.96966 | 0.98483 |
| 2136 | 0.97795 | 0.96966 | 0.9849  |
| 2135 | 0.97793 | 0.96966 | 0.98496 |
| 2134 | 0.97792 | 0.96967 | 0.98511 |
| 2133 | 0.97793 | 0.96978 | 0.98534 |
| 2132 | 0.97796 | 0.97001 | 0.98552 |
| 2131 | 0.97799 | 0.97032 | 0.98555 |
| 2130 | 0.97802 | 0.9706  | 0.98549 |
| 2129 | 0.97805 | 0.97076 | 0.98545 |
| 2128 | 0.97807 | 0.97074 | 0.98545 |
| 2127 | 0.97808 | 0.97055 | 0.98541 |
| 2126 | 0.97806 | 0.9703  | 0.98529 |
| 2125 | 0.97803 | 0.97014 | 0.9852  |
| 2124 | 0.97801 | 0.97015 | 0.9853  |
| 2123 | 0.97799 | 0.97027 | 0.9856  |
| 2122 | 0.97798 | 0.97039 | 0.98593 |
| 2121 | 0.97796 | 0.97046 | 0.98607 |
| 2120 | 0.97795 | 0.97055 | 0.98599 |
| 2119 | 0.97794 | 0.9707  | 0.98574 |
| 2118 | 0.97794 | 0.97091 | 0.98548 |
| 2117 | 0.97795 | 0.9711  | 0.98534 |
| 2116 | 0.97798 | 0.97119 | 0.98537 |
| 2115 | 0.978   | 0.97117 | 0.98547 |

|      |         |         |         |
|------|---------|---------|---------|
| 2114 | 0.97802 | 0.97106 | 0.98552 |
| 2113 | 0.97802 | 0.97095 | 0.98557 |
| 2112 | 0.97802 | 0.9709  | 0.98571 |
| 2111 | 0.978   | 0.9709  | 0.98594 |
| 2110 | 0.97797 | 0.97094 | 0.98606 |
| 2109 | 0.97795 | 0.97101 | 0.98589 |
| 2108 | 0.97794 | 0.97107 | 0.98551 |
| 2107 | 0.97793 | 0.97108 | 0.98524 |
| 2106 | 0.97793 | 0.97103 | 0.98534 |
| 2105 | 0.97792 | 0.97101 | 0.98569 |
| 2104 | 0.97791 | 0.9711  | 0.986   |
| 2103 | 0.97791 | 0.97124 | 0.98609 |
| 2102 | 0.97792 | 0.97134 | 0.986   |
| 2101 | 0.97794 | 0.9713  | 0.98588 |
| 2100 | 0.97797 | 0.97119 | 0.98582 |
| 2099 | 0.978   | 0.97108 | 0.98585 |
| 2098 | 0.97803 | 0.97105 | 0.98585 |
| 2097 | 0.97805 | 0.9711  | 0.98575 |
| 2096 | 0.97808 | 0.97124 | 0.98559 |
| 2095 | 0.97811 | 0.97145 | 0.98551 |
| 2094 | 0.97813 | 0.9716  | 0.98559 |
| 2093 | 0.97815 | 0.97159 | 0.98575 |
| 2092 | 0.97815 | 0.97147 | 0.98588 |
| 2091 | 0.97815 | 0.97137 | 0.9859  |
| 2090 | 0.97814 | 0.97139 | 0.9857  |
| 2089 | 0.97813 | 0.97147 | 0.98524 |
| 2088 | 0.97813 | 0.97151 | 0.9847  |
| 2087 | 0.97812 | 0.97146 | 0.98435 |
| 2086 | 0.9781  | 0.9713  | 0.98434 |
| 2085 | 0.9781  | 0.97106 | 0.98459 |
| 2084 | 0.97809 | 0.97083 | 0.98491 |
| 2083 | 0.9781  | 0.9707  | 0.98515 |
| 2082 | 0.97811 | 0.97068 | 0.98526 |
| 2081 | 0.97812 | 0.97071 | 0.98529 |
| 2080 | 0.97813 | 0.97074 | 0.98525 |
| 2079 | 0.97812 | 0.97072 | 0.98516 |
| 2078 | 0.97811 | 0.97065 | 0.9851  |
| 2077 | 0.97808 | 0.9706  | 0.98511 |
| 2076 | 0.97804 | 0.97061 | 0.98512 |
| 2075 | 0.978   | 0.9707  | 0.985   |
| 2074 | 0.97794 | 0.97077 | 0.98469 |
| 2073 | 0.97788 | 0.97071 | 0.98434 |
| 2072 | 0.97783 | 0.97053 | 0.98416 |

|      |         |         |         |
|------|---------|---------|---------|
| 2071 | 0.97777 | 0.9703  | 0.98424 |
| 2070 | 0.97773 | 0.97008 | 0.98444 |
| 2069 | 0.97768 | 0.96988 | 0.98448 |
| 2068 | 0.97764 | 0.96972 | 0.98424 |
| 2067 | 0.97759 | 0.96963 | 0.9839  |
| 2066 | 0.97753 | 0.96966 | 0.98376 |
| 2065 | 0.97746 | 0.96974 | 0.9839  |
| 2064 | 0.97739 | 0.96977 | 0.98418 |
| 2063 | 0.97731 | 0.96972 | 0.98444 |
| 2062 | 0.97723 | 0.96962 | 0.98459 |
| 2061 | 0.97715 | 0.96952 | 0.9846  |
| 2060 | 0.97708 | 0.9695  | 0.98447 |
| 2059 | 0.97701 | 0.96958 | 0.98431 |
| 2058 | 0.97694 | 0.96969 | 0.98429 |
| 2057 | 0.97686 | 0.96969 | 0.98446 |
| 2056 | 0.97679 | 0.96954 | 0.98473 |
| 2055 | 0.97671 | 0.96938 | 0.98488 |
| 2054 | 0.97664 | 0.96932 | 0.9848  |
| 2053 | 0.97659 | 0.96938 | 0.98458 |
| 2052 | 0.97656 | 0.96942 | 0.98446 |
| 2051 | 0.97653 | 0.9693  | 0.98455 |
| 2050 | 0.97651 | 0.969   | 0.98469 |
| 2049 | 0.9765  | 0.96862 | 0.98458 |
| 2048 | 0.9765  | 0.96829 | 0.98414 |
| 2047 | 0.97649 | 0.96807 | 0.98359 |
| 2046 | 0.97649 | 0.96795 | 0.98314 |
| 2045 | 0.97648 | 0.96795 | 0.98284 |
| 2044 | 0.97646 | 0.96801 | 0.98257 |
| 2043 | 0.97644 | 0.96807 | 0.9823  |
| 2042 | 0.97643 | 0.96812 | 0.98213 |
| 2041 | 0.97642 | 0.96824 | 0.98221 |
| 2040 | 0.97643 | 0.96842 | 0.98264 |
| 2039 | 0.97645 | 0.96855 | 0.98329 |
| 2038 | 0.97646 | 0.96849 | 0.9838  |
| 2037 | 0.97649 | 0.96832 | 0.98389 |
| 2036 | 0.97653 | 0.96823 | 0.98365 |
| 2035 | 0.97658 | 0.96832 | 0.98343 |
| 2034 | 0.97662 | 0.96851 | 0.98345 |
| 2033 | 0.97665 | 0.96861 | 0.98361 |
| 2032 | 0.97666 | 0.96852 | 0.98367 |
| 2031 | 0.97666 | 0.9683  | 0.98353 |
| 2030 | 0.97666 | 0.96811 | 0.9833  |
| 2029 | 0.97666 | 0.96798 | 0.98315 |

|      |         |         |         |
|------|---------|---------|---------|
| 2028 | 0.97666 | 0.96786 | 0.98319 |
| 2027 | 0.97665 | 0.9677  | 0.9834  |
| 2026 | 0.97662 | 0.96751 | 0.98362 |
| 2025 | 0.97661 | 0.96739 | 0.98367 |
| 2024 | 0.9766  | 0.96745 | 0.98354 |
| 2023 | 0.97662 | 0.96767 | 0.98338 |
| 2022 | 0.97665 | 0.96794 | 0.98344 |
| 2021 | 0.97669 | 0.96823 | 0.98386 |
| 2020 | 0.97673 | 0.96861 | 0.98448 |
| 2019 | 0.97678 | 0.96907 | 0.98497 |
| 2018 | 0.97683 | 0.96938 | 0.98505 |
| 2017 | 0.97688 | 0.96938 | 0.98467 |
| 2016 | 0.97692 | 0.9692  | 0.98412 |
| 2015 | 0.97692 | 0.96906 | 0.98379 |
| 2014 | 0.97691 | 0.96903 | 0.98381 |
| 2013 | 0.97689 | 0.96909 | 0.98405 |
| 2012 | 0.97688 | 0.96916 | 0.98435 |
| 2011 | 0.97689 | 0.96914 | 0.98461 |
| 2010 | 0.97693 | 0.96901 | 0.98484 |
| 2009 | 0.977   | 0.9689  | 0.98499 |
| 2008 | 0.97709 | 0.96898 | 0.98501 |
| 2007 | 0.97719 | 0.96919 | 0.985   |
| 2006 | 0.9773  | 0.96926 | 0.98513 |
| 2005 | 0.97741 | 0.96911 | 0.98534 |
| 2004 | 0.97753 | 0.96891 | 0.9854  |
| 2003 | 0.97763 | 0.96893 | 0.9852  |
| 2002 | 0.97772 | 0.96919 | 0.9848  |
| 2001 | 0.9778  | 0.96951 | 0.9844  |
| 2000 | 0.97787 | 0.96969 | 0.98417 |
| 1999 | 0.97793 | 0.96965 | 0.98423 |
| 1998 | 0.97796 | 0.96948 | 0.98453 |
| 1997 | 0.97799 | 0.96933 | 0.98483 |
| 1996 | 0.97799 | 0.96927 | 0.98494 |
| 1995 | 0.97798 | 0.96928 | 0.98492 |
| 1994 | 0.97796 | 0.96926 | 0.98497 |
| 1993 | 0.97795 | 0.9691  | 0.98514 |
| 1992 | 0.97793 | 0.96876 | 0.9852  |
| 1991 | 0.97792 | 0.9685  | 0.98501 |
| 1990 | 0.9779  | 0.96852 | 0.98468 |
| 1989 | 0.97788 | 0.96878 | 0.98443 |
| 1988 | 0.97785 | 0.96911 | 0.98435 |
| 1987 | 0.97782 | 0.9694  | 0.98437 |
| 1986 | 0.97778 | 0.96959 | 0.98442 |



|      |         |         |         |
|------|---------|---------|---------|
| 1985 | 0.97774 | 0.96961 | 0.98443 |
| 1984 | 0.97767 | 0.96948 | 0.98435 |
| 1983 | 0.97761 | 0.96938 | 0.98419 |
| 1982 | 0.97756 | 0.96943 | 0.98398 |
| 1981 | 0.97753 | 0.96954 | 0.98366 |
| 1980 | 0.97752 | 0.96963 | 0.98315 |
| 1979 | 0.97751 | 0.96968 | 0.98253 |
| 1978 | 0.97749 | 0.96971 | 0.98204 |
| 1977 | 0.97749 | 0.96976 | 0.98195 |
| 1976 | 0.9775  | 0.96994 | 0.98232 |
| 1975 | 0.97752 | 0.97028 | 0.98297 |
| 1974 | 0.97755 | 0.97054 | 0.9836  |
| 1973 | 0.97759 | 0.97053 | 0.98409 |
| 1972 | 0.97764 | 0.97042 | 0.98461 |
| 1971 | 0.9777  | 0.97043 | 0.98519 |
| 1970 | 0.97777 | 0.97052 | 0.98558 |
| 1969 | 0.97784 | 0.97055 | 0.98562 |
| 1968 | 0.97791 | 0.9706  | 0.98551 |
| 1967 | 0.97796 | 0.97077 | 0.98551 |
| 1966 | 0.978   | 0.97108 | 0.9857  |
| 1965 | 0.97804 | 0.97148 | 0.98594 |
| 1964 | 0.97811 | 0.97185 | 0.986   |
| 1963 | 0.97821 | 0.97206 | 0.9858  |
| 1962 | 0.97834 | 0.97209 | 0.98549 |
| 1961 | 0.97848 | 0.97203 | 0.98536 |
| 1960 | 0.97862 | 0.97203 | 0.98559 |
| 1959 | 0.97876 | 0.97212 | 0.98608 |
| 1958 | 0.97888 | 0.97221 | 0.98654 |
| 1957 | 0.97899 | 0.97222 | 0.98673 |
| 1956 | 0.97908 | 0.97214 | 0.9866  |
| 1955 | 0.97916 | 0.97209 | 0.98628 |
| 1954 | 0.97922 | 0.97216 | 0.986   |
| 1953 | 0.97929 | 0.97233 | 0.98596 |
| 1952 | 0.97935 | 0.9725  | 0.98622 |
| 1951 | 0.97939 | 0.97262 | 0.98666 |
| 1950 | 0.97944 | 0.97274 | 0.98713 |
| 1949 | 0.97947 | 0.97284 | 0.98748 |
| 1948 | 0.97951 | 0.9728  | 0.98766 |
| 1947 | 0.97953 | 0.97263 | 0.98773 |
| 1946 | 0.97956 | 0.97241 | 0.98769 |
| 1945 | 0.97959 | 0.97224 | 0.98753 |
| 1944 | 0.97962 | 0.97223 | 0.98735 |
| 1943 | 0.97966 | 0.97243 | 0.98732 |

|      |         |         |         |
|------|---------|---------|---------|
| 1942 | 0.97969 | 0.97273 | 0.98747 |
| 1941 | 0.97971 | 0.973   | 0.98762 |
| 1940 | 0.97973 | 0.97311 | 0.98764 |
| 1939 | 0.97975 | 0.97313 | 0.98762 |
| 1938 | 0.97977 | 0.9732  | 0.98771 |
| 1937 | 0.97979 | 0.97336 | 0.98791 |
| 1936 | 0.97981 | 0.97352 | 0.98812 |
| 1935 | 0.97982 | 0.97362 | 0.98834 |
| 1934 | 0.97984 | 0.9736  | 0.98852 |
| 1933 | 0.97986 | 0.97345 | 0.98856 |
| 1932 | 0.97989 | 0.97328 | 0.98848 |
| 1931 | 0.97992 | 0.97329 | 0.98844 |
| 1930 | 0.97995 | 0.97349 | 0.98847 |
| 1929 | 0.97998 | 0.97375 | 0.98847 |
| 1928 | 0.98    | 0.97396 | 0.9884  |
| 1927 | 0.98002 | 0.97408 | 0.98829 |
| 1926 | 0.98004 | 0.974   | 0.98814 |
| 1925 | 0.98006 | 0.97381 | 0.98804 |
| 1924 | 0.9801  | 0.97376 | 0.98818 |
| 1923 | 0.98014 | 0.97385 | 0.98847 |
| 1922 | 0.98019 | 0.97391 | 0.98871 |
| 1921 | 0.98024 | 0.97384 | 0.98878 |
| 1920 | 0.98027 | 0.97364 | 0.98862 |
| 1919 | 0.98029 | 0.97351 | 0.98826 |
| 1918 | 0.98029 | 0.97354 | 0.9879  |
| 1917 | 0.98029 | 0.97372 | 0.98777 |
| 1916 | 0.9803  | 0.97397 | 0.98799 |
| 1915 | 0.98031 | 0.97413 | 0.98836 |
| 1914 | 0.98034 | 0.97423 | 0.98869 |
| 1913 | 0.98036 | 0.97438 | 0.98893 |
| 1912 | 0.98039 | 0.97455 | 0.98902 |
| 1911 | 0.98042 | 0.97466 | 0.98896 |
| 1910 | 0.98044 | 0.97476 | 0.98895 |
| 1909 | 0.98047 | 0.97489 | 0.98906 |
| 1908 | 0.98049 | 0.97506 | 0.98922 |
| 1907 | 0.98052 | 0.97518 | 0.98935 |
| 1906 | 0.98055 | 0.97518 | 0.98947 |
| 1905 | 0.98058 | 0.9751  | 0.9896  |
| 1904 | 0.98062 | 0.97499 | 0.98968 |
| 1903 | 0.98065 | 0.97491 | 0.98966 |
| 1902 | 0.98068 | 0.97489 | 0.98959 |
| 1901 | 0.98071 | 0.97495 | 0.98956 |
| 1900 | 0.98075 | 0.97507 | 0.98959 |

|      |         |         |         |
|------|---------|---------|---------|
| 1899 | 0.98078 | 0.97525 | 0.98962 |
| 1898 | 0.98081 | 0.97542 | 0.9896  |
| 1897 | 0.98085 | 0.9755  | 0.98947 |
| 1896 | 0.9809  | 0.97546 | 0.98926 |
| 1895 | 0.98094 | 0.97535 | 0.98904 |
| 1894 | 0.98099 | 0.97529 | 0.98891 |
| 1893 | 0.98102 | 0.97527 | 0.98893 |
| 1892 | 0.98105 | 0.97524 | 0.9891  |
| 1891 | 0.98107 | 0.97535 | 0.98949 |
| 1890 | 0.98108 | 0.97557 | 0.98993 |
| 1889 | 0.98108 | 0.97573 | 0.99006 |
| 1888 | 0.98109 | 0.97582 | 0.98992 |
| 1887 | 0.98111 | 0.97588 | 0.98976 |
| 1886 | 0.98112 | 0.9759  | 0.98974 |
| 1885 | 0.98114 | 0.97586 | 0.98983 |
| 1884 | 0.98116 | 0.9758  | 0.98996 |
| 1883 | 0.98119 | 0.97577 | 0.99006 |
| 1882 | 0.98121 | 0.97577 | 0.99011 |
| 1881 | 0.98124 | 0.9758  | 0.99012 |
| 1880 | 0.98127 | 0.97581 | 0.99004 |
| 1879 | 0.98129 | 0.9758  | 0.9899  |
| 1878 | 0.98131 | 0.97584 | 0.98978 |
| 1877 | 0.98133 | 0.97597 | 0.98975 |
| 1876 | 0.98136 | 0.97609 | 0.9897  |
| 1875 | 0.98138 | 0.97611 | 0.98956 |
| 1874 | 0.98141 | 0.97618 | 0.98948 |
| 1873 | 0.98144 | 0.97635 | 0.98958 |
| 1872 | 0.98146 | 0.97635 | 0.9897  |
| 1871 | 0.98149 | 0.97609 | 0.98971 |
| 1870 | 0.98151 | 0.97609 | 0.98992 |
| 1869 | 0.98153 | 0.97631 | 0.99022 |
| 1868 | 0.98154 | 0.97629 | 0.99011 |
| 1867 | 0.98156 | 0.97624 | 0.98995 |
| 1866 | 0.98158 | 0.97632 | 0.99006 |
| 1865 | 0.9816  | 0.97636 | 0.99019 |
| 1864 | 0.98162 | 0.97638 | 0.99023 |
| 1863 | 0.98164 | 0.97642 | 0.9902  |
| 1862 | 0.98165 | 0.97651 | 0.99015 |
| 1861 | 0.98166 | 0.97661 | 0.99008 |
| 1860 | 0.98167 | 0.97665 | 0.99003 |
| 1859 | 0.98167 | 0.97664 | 0.99004 |
| 1858 | 0.98167 | 0.9766  | 0.99009 |
| 1857 | 0.98168 | 0.97653 | 0.99011 |

|      |         |         |         |
|------|---------|---------|---------|
| 1856 | 0.9817  | 0.97643 | 0.9901  |
| 1855 | 0.98171 | 0.97636 | 0.99013 |
| 1854 | 0.98172 | 0.97633 | 0.99018 |
| 1853 | 0.98174 | 0.97637 | 0.99019 |
| 1852 | 0.98176 | 0.97648 | 0.99013 |
| 1851 | 0.98179 | 0.97664 | 0.99005 |
| 1850 | 0.98181 | 0.97676 | 0.99002 |
| 1849 | 0.98183 | 0.9768  | 0.99017 |
| 1848 | 0.98185 | 0.97674 | 0.99046 |
| 1847 | 0.98187 | 0.97653 | 0.99062 |
| 1846 | 0.98189 | 0.97636 | 0.99056 |
| 1845 | 0.9819  | 0.97635 | 0.99041 |
| 1844 | 0.9819  | 0.97636 | 0.99014 |
| 1843 | 0.9819  | 0.97647 | 0.99    |
| 1842 | 0.9819  | 0.97661 | 0.99014 |
| 1841 | 0.98189 | 0.9765  | 0.99023 |
| 1840 | 0.98189 | 0.97638 | 0.99027 |
| 1839 | 0.9819  | 0.97653 | 0.99042 |
| 1838 | 0.98191 | 0.97677 | 0.99058 |
| 1837 | 0.98193 | 0.97677 | 0.99049 |
| 1836 | 0.98195 | 0.97666 | 0.99026 |
| 1835 | 0.98197 | 0.97675 | 0.99016 |
| 1834 | 0.98199 | 0.97691 | 0.9902  |
| 1833 | 0.98201 | 0.97684 | 0.99022 |
| 1832 | 0.98203 | 0.97666 | 0.9903  |
| 1831 | 0.98206 | 0.97681 | 0.9907  |
| 1830 | 0.98208 | 0.977   | 0.99095 |
| 1829 | 0.98211 | 0.97697 | 0.99069 |
| 1828 | 0.98213 | 0.97706 | 0.99044 |
| 1827 | 0.98216 | 0.97721 | 0.99042 |
| 1826 | 0.9822  | 0.97724 | 0.99046 |
| 1825 | 0.98223 | 0.97718 | 0.99046 |
| 1824 | 0.98225 | 0.97714 | 0.99042 |
| 1823 | 0.98228 | 0.97712 | 0.99038 |
| 1822 | 0.9823  | 0.97702 | 0.99024 |
| 1821 | 0.98231 | 0.97688 | 0.99004 |
| 1820 | 0.98232 | 0.97684 | 0.98992 |
| 1819 | 0.98232 | 0.97687 | 0.98989 |
| 1818 | 0.98233 | 0.97689 | 0.98993 |
| 1817 | 0.98234 | 0.97694 | 0.99001 |
| 1816 | 0.98235 | 0.97709 | 0.99018 |
| 1815 | 0.98235 | 0.97728 | 0.99038 |
| 1814 | 0.98235 | 0.97739 | 0.9905  |

|      |         |         |         |
|------|---------|---------|---------|
| 1813 | 0.98235 | 0.97741 | 0.99054 |
| 1812 | 0.98235 | 0.97739 | 0.99059 |
| 1811 | 0.98234 | 0.97732 | 0.99059 |
| 1810 | 0.98233 | 0.97728 | 0.99057 |
| 1809 | 0.98233 | 0.97735 | 0.99056 |
| 1808 | 0.98232 | 0.97737 | 0.99048 |
| 1807 | 0.98231 | 0.97732 | 0.99032 |
| 1806 | 0.9823  | 0.9773  | 0.99024 |
| 1805 | 0.98229 | 0.97732 | 0.99021 |
| 1804 | 0.98228 | 0.97727 | 0.99007 |
| 1803 | 0.98227 | 0.97717 | 0.98984 |
| 1802 | 0.98225 | 0.97707 | 0.98972 |
| 1801 | 0.98223 | 0.97697 | 0.98973 |
| 1800 | 0.9822  | 0.97694 | 0.98983 |
| 1799 | 0.98218 | 0.97701 | 0.98996 |
| 1798 | 0.98215 | 0.97699 | 0.98998 |
| 1797 | 0.98213 | 0.97693 | 0.98994 |
| 1796 | 0.98211 | 0.97704 | 0.98999 |
| 1795 | 0.98207 | 0.97714 | 0.99003 |
| 1794 | 0.98203 | 0.97704 | 0.98994 |
| 1793 | 0.98198 | 0.97696 | 0.98995 |
| 1792 | 0.98194 | 0.97691 | 0.98995 |
| 1791 | 0.98189 | 0.97694 | 0.98979 |
| 1790 | 0.98184 | 0.97709 | 0.98969 |
| 1789 | 0.98179 | 0.977   | 0.98952 |
| 1788 | 0.98174 | 0.97683 | 0.9893  |
| 1787 | 0.98169 | 0.97684 | 0.98918 |
| 1786 | 0.98164 | 0.97695 | 0.98913 |
| 1785 | 0.98159 | 0.97704 | 0.98912 |
| 1784 | 0.98153 | 0.97718 | 0.98923 |
| 1783 | 0.98146 | 0.9773  | 0.9894  |
| 1782 | 0.98139 | 0.9773  | 0.98953 |
| 1781 | 0.98131 | 0.97728 | 0.98964 |
| 1780 | 0.98122 | 0.97726 | 0.98968 |
| 1779 | 0.98111 | 0.97716 | 0.98955 |
| 1778 | 0.98099 | 0.97708 | 0.98938 |
| 1777 | 0.98086 | 0.9772  | 0.9894  |
| 1776 | 0.98071 | 0.97736 | 0.98943 |
| 1775 | 0.98055 | 0.9771  | 0.98904 |
| 1774 | 0.98038 | 0.97676 | 0.98858 |
| 1773 | 0.98018 | 0.97693 | 0.98866 |
| 1772 | 0.97995 | 0.97702 | 0.98875 |
| 1771 | 0.97969 | 0.97693 | 0.98862 |

|      |         |         |         |
|------|---------|---------|---------|
| 1770 | 0.9794  | 0.97702 | 0.98871 |
| 1769 | 0.97909 | 0.97706 | 0.98876 |
| 1768 | 0.97875 | 0.97705 | 0.98864 |
| 1767 | 0.97837 | 0.97707 | 0.98846 |
| 1766 | 0.97797 | 0.97713 | 0.98838 |
| 1765 | 0.97753 | 0.97719 | 0.98838 |
| 1764 | 0.97707 | 0.97731 | 0.98834 |
| 1763 | 0.97657 | 0.97758 | 0.98828 |
| 1762 | 0.97605 | 0.97771 | 0.988   |
| 1761 | 0.9755  | 0.97761 | 0.98755 |
| 1760 | 0.97494 | 0.97755 | 0.98723 |
| 1759 | 0.97435 | 0.97743 | 0.98693 |
| 1758 | 0.97375 | 0.97724 | 0.98647 |
| 1757 | 0.97311 | 0.97704 | 0.98584 |
| 1756 | 0.97246 | 0.97691 | 0.98517 |
| 1755 | 0.97179 | 0.97683 | 0.98465 |
| 1754 | 0.97111 | 0.97669 | 0.98419 |
| 1753 | 0.97042 | 0.97653 | 0.98368 |
| 1752 | 0.96973 | 0.97643 | 0.98308 |
| 1751 | 0.96903 | 0.97638 | 0.98245 |
| 1750 | 0.96834 | 0.97628 | 0.98185 |
| 1749 | 0.96764 | 0.97608 | 0.98128 |
| 1748 | 0.96695 | 0.97598 | 0.98069 |
| 1747 | 0.96626 | 0.97617 | 0.98017 |
| 1746 | 0.96558 | 0.97645 | 0.97965 |
| 1745 | 0.96492 | 0.97664 | 0.97904 |
| 1744 | 0.96429 | 0.97673 | 0.97842 |
| 1743 | 0.9637  | 0.9768  | 0.9779  |
| 1742 | 0.96313 | 0.97682 | 0.97744 |
| 1741 | 0.96259 | 0.97671 | 0.97681 |
| 1740 | 0.96208 | 0.97648 | 0.97588 |
| 1739 | 0.9616  | 0.97636 | 0.97497 |
| 1738 | 0.96116 | 0.97654 | 0.97451 |
| 1737 | 0.96076 | 0.97648 | 0.97411 |
| 1736 | 0.9604  | 0.97589 | 0.97324 |
| 1735 | 0.96007 | 0.97592 | 0.97279 |
| 1734 | 0.9598  | 0.97633 | 0.97269 |
| 1733 | 0.95957 | 0.97626 | 0.97234 |
| 1732 | 0.95938 | 0.97624 | 0.9723  |
| 1731 | 0.95923 | 0.97619 | 0.97231 |
| 1730 | 0.95911 | 0.97617 | 0.97214 |
| 1729 | 0.95905 | 0.97635 | 0.97198 |
| 1728 | 0.95903 | 0.97645 | 0.97181 |

|      |         |         |         |
|------|---------|---------|---------|
| 1727 | 0.95904 | 0.97628 | 0.97157 |
| 1726 | 0.95909 | 0.97605 | 0.97144 |
| 1725 | 0.95917 | 0.97605 | 0.97165 |
| 1724 | 0.95928 | 0.97605 | 0.97197 |
| 1723 | 0.9594  | 0.9757  | 0.97193 |
| 1722 | 0.95954 | 0.9754  | 0.97181 |
| 1721 | 0.95972 | 0.97575 | 0.97212 |
| 1720 | 0.95992 | 0.9761  | 0.97245 |
| 1719 | 0.96012 | 0.97562 | 0.97208 |
| 1718 | 0.96033 | 0.97528 | 0.97206 |
| 1717 | 0.96055 | 0.97486 | 0.97264 |
| 1716 | 0.96077 | 0.97433 | 0.97325 |
| 1715 | 0.961   | 0.97479 | 0.97426 |
| 1714 | 0.96122 | 0.97517 | 0.97492 |
| 1713 | 0.96142 | 0.97504 | 0.97505 |
| 1712 | 0.96162 | 0.97498 | 0.97533 |
| 1711 | 0.96182 | 0.97509 | 0.97586 |
| 1710 | 0.96201 | 0.97513 | 0.97636 |
| 1709 | 0.96218 | 0.97512 | 0.9768  |
| 1708 | 0.96233 | 0.97508 | 0.97719 |
| 1707 | 0.96243 | 0.97509 | 0.97772 |
| 1706 | 0.9625  | 0.97517 | 0.97844 |
| 1705 | 0.96256 | 0.97512 | 0.97901 |
| 1704 | 0.96257 | 0.9752  | 0.97942 |
| 1703 | 0.96254 | 0.97539 | 0.97974 |
| 1702 | 0.96247 | 0.97529 | 0.9799  |
| 1701 | 0.96238 | 0.97505 | 0.98007 |
| 1700 | 0.96225 | 0.9743  | 0.97989 |
| 1699 | 0.96207 | 0.9731  | 0.97928 |
| 1698 | 0.96182 | 0.97289 | 0.97961 |
| 1697 | 0.96151 | 0.97335 | 0.98068 |
| 1696 | 0.96114 | 0.97337 | 0.98103 |
| 1695 | 0.96074 | 0.97343 | 0.98105 |
| 1694 | 0.96029 | 0.97348 | 0.9812  |
| 1693 | 0.95978 | 0.97316 | 0.98118 |
| 1692 | 0.95918 | 0.97279 | 0.98114 |
| 1691 | 0.95848 | 0.97264 | 0.98128 |
| 1690 | 0.95769 | 0.97262 | 0.98147 |
| 1689 | 0.95684 | 0.97255 | 0.98151 |
| 1688 | 0.95594 | 0.97263 | 0.98154 |
| 1687 | 0.95497 | 0.97268 | 0.98149 |
| 1686 | 0.95391 | 0.97234 | 0.98113 |
| 1685 | 0.95277 | 0.97227 | 0.98106 |

|      |         |         |         |
|------|---------|---------|---------|
| 1684 | 0.95154 | 0.9723  | 0.98099 |
| 1683 | 0.95021 | 0.97232 | 0.98107 |
| 1682 | 0.94879 | 0.97246 | 0.98163 |
| 1681 | 0.9473  | 0.9718  | 0.98151 |
| 1680 | 0.94574 | 0.9709  | 0.98094 |
| 1679 | 0.94414 | 0.97063 | 0.98066 |
| 1678 | 0.94252 | 0.97071 | 0.98052 |
| 1677 | 0.94089 | 0.97054 | 0.98012 |
| 1676 | 0.93919 | 0.97021 | 0.97967 |
| 1675 | 0.93743 | 0.96996 | 0.97951 |
| 1674 | 0.93563 | 0.96979 | 0.97958 |
| 1673 | 0.93381 | 0.96936 | 0.97953 |
| 1672 | 0.93199 | 0.96862 | 0.97915 |
| 1671 | 0.93017 | 0.96855 | 0.97931 |
| 1670 | 0.92831 | 0.96869 | 0.97962 |
| 1669 | 0.92642 | 0.96827 | 0.97909 |
| 1668 | 0.92452 | 0.96802 | 0.97857 |
| 1667 | 0.92262 | 0.96794 | 0.97847 |
| 1666 | 0.92073 | 0.9677  | 0.97835 |
| 1665 | 0.91884 | 0.96717 | 0.97795 |
| 1664 | 0.91696 | 0.96674 | 0.97756 |
| 1663 | 0.9151  | 0.96644 | 0.97737 |
| 1662 | 0.91327 | 0.96602 | 0.97704 |
| 1661 | 0.91151 | 0.96581 | 0.97673 |
| 1660 | 0.9098  | 0.96558 | 0.97645 |
| 1659 | 0.90811 | 0.96505 | 0.97608 |
| 1658 | 0.90642 | 0.96478 | 0.97597 |
| 1657 | 0.90474 | 0.96518 | 0.97632 |
| 1656 | 0.90309 | 0.96532 | 0.97677 |
| 1655 | 0.90147 | 0.96497 | 0.97749 |
| 1654 | 0.89986 | 0.96509 | 0.97856 |
| 1653 | 0.89828 | 0.96462 | 0.97767 |
| 1652 | 0.89673 | 0.96471 | 0.9764  |
| 1651 | 0.89518 | 0.96572 | 0.97675 |
| 1650 | 0.89361 | 0.96469 | 0.97616 |
| 1649 | 0.892   | 0.96261 | 0.97467 |
| 1648 | 0.89038 | 0.96228 | 0.97457 |
| 1647 | 0.88875 | 0.96255 | 0.97493 |
| 1646 | 0.88712 | 0.96246 | 0.97452 |
| 1645 | 0.88547 | 0.96284 | 0.97462 |
| 1644 | 0.88379 | 0.96274 | 0.97457 |
| 1643 | 0.88203 | 0.96255 | 0.97449 |
| 1642 | 0.88018 | 0.96253 | 0.97454 |



|      |         |         |         |
|------|---------|---------|---------|
| 1641 | 0.87829 | 0.96256 | 0.9745  |
| 1640 | 0.87641 | 0.96261 | 0.97445 |
| 1639 | 0.87455 | 0.96264 | 0.9744  |
| 1638 | 0.87271 | 0.96264 | 0.97435 |
| 1637 | 0.87089 | 0.96316 | 0.97494 |
| 1636 | 0.86909 | 0.96332 | 0.97528 |
| 1635 | 0.86733 | 0.96363 | 0.97543 |
| 1634 | 0.86563 | 0.96461 | 0.97634 |
| 1633 | 0.86403 | 0.96445 | 0.97655 |
| 1632 | 0.86253 | 0.96374 | 0.97626 |
| 1631 | 0.86116 | 0.9636  | 0.97634 |
| 1630 | 0.85992 | 0.96394 | 0.97662 |
| 1629 | 0.85882 | 0.96426 | 0.97678 |
| 1628 | 0.85784 | 0.96465 | 0.97701 |
| 1627 | 0.85696 | 0.96511 | 0.9774  |
| 1626 | 0.85619 | 0.96539 | 0.9777  |
| 1625 | 0.8556  | 0.96564 | 0.978   |
| 1624 | 0.85521 | 0.96614 | 0.97857 |
| 1623 | 0.855   | 0.96642 | 0.97891 |
| 1622 | 0.85496 | 0.9664  | 0.97893 |
| 1621 | 0.85508 | 0.96656 | 0.97912 |
| 1620 | 0.85535 | 0.96671 | 0.97928 |
| 1619 | 0.8558  | 0.96662 | 0.9791  |
| 1618 | 0.85643 | 0.96681 | 0.97914 |
| 1617 | 0.85726 | 0.96729 | 0.97958 |
| 1616 | 0.85826 | 0.9676  | 0.97996 |
| 1615 | 0.85942 | 0.96805 | 0.98054 |
| 1614 | 0.86075 | 0.96823 | 0.98099 |
| 1613 | 0.86225 | 0.96799 | 0.98105 |
| 1612 | 0.86391 | 0.96789 | 0.98115 |
| 1611 | 0.8657  | 0.96811 | 0.98139 |
| 1610 | 0.86758 | 0.96841 | 0.98159 |
| 1609 | 0.86954 | 0.96866 | 0.9817  |
| 1608 | 0.87159 | 0.9689  | 0.98187 |
| 1607 | 0.87373 | 0.96912 | 0.98211 |
| 1606 | 0.87594 | 0.96923 | 0.98231 |
| 1605 | 0.8782  | 0.96924 | 0.98244 |
| 1604 | 0.88051 | 0.96931 | 0.98265 |
| 1603 | 0.88283 | 0.96952 | 0.98298 |
| 1602 | 0.88511 | 0.96976 | 0.9833  |
| 1601 | 0.88736 | 0.96995 | 0.9835  |
| 1600 | 0.88957 | 0.97011 | 0.98358 |
| 1599 | 0.89177 | 0.97027 | 0.98363 |

|      |         |         |         |
|------|---------|---------|---------|
| 1598 | 0.89394 | 0.97042 | 0.98369 |
| 1597 | 0.89609 | 0.97055 | 0.9838  |
| 1596 | 0.89818 | 0.97072 | 0.98401 |
| 1595 | 0.9002  | 0.9709  | 0.98422 |
| 1594 | 0.90214 | 0.97104 | 0.98436 |
| 1593 | 0.904   | 0.97114 | 0.98446 |
| 1592 | 0.90583 | 0.97123 | 0.98456 |
| 1591 | 0.90765 | 0.97136 | 0.98467 |
| 1590 | 0.90946 | 0.97152 | 0.98474 |
| 1589 | 0.91124 | 0.97168 | 0.98477 |
| 1588 | 0.91298 | 0.97182 | 0.98483 |
| 1587 | 0.91469 | 0.97195 | 0.98497 |
| 1586 | 0.91634 | 0.97206 | 0.9851  |
| 1585 | 0.91792 | 0.97216 | 0.98515 |
| 1584 | 0.91942 | 0.97229 | 0.98515 |
| 1583 | 0.9209  | 0.97241 | 0.98512 |
| 1582 | 0.92235 | 0.9725  | 0.98513 |
| 1581 | 0.92376 | 0.97262 | 0.9853  |
| 1580 | 0.92515 | 0.97278 | 0.98564 |
| 1579 | 0.92651 | 0.97277 | 0.98583 |
| 1578 | 0.92783 | 0.97284 | 0.98589 |
| 1577 | 0.92912 | 0.97312 | 0.98606 |
| 1576 | 0.93038 | 0.97292 | 0.98575 |
| 1575 | 0.93163 | 0.97303 | 0.98566 |
| 1574 | 0.93284 | 0.97377 | 0.98631 |
| 1573 | 0.93402 | 0.97373 | 0.98639 |
| 1572 | 0.93517 | 0.97309 | 0.98589 |
| 1571 | 0.93628 | 0.97305 | 0.98589 |
| 1570 | 0.93735 | 0.97354 | 0.98624 |
| 1569 | 0.93837 | 0.97346 | 0.98592 |
| 1568 | 0.93938 | 0.97311 | 0.98542 |
| 1567 | 0.94034 | 0.97318 | 0.98549 |
| 1566 | 0.94123 | 0.97351 | 0.98585 |
| 1565 | 0.94209 | 0.9734  | 0.98581 |
| 1564 | 0.94293 | 0.97299 | 0.98552 |
| 1563 | 0.94375 | 0.97343 | 0.9858  |
| 1562 | 0.94455 | 0.97467 | 0.98667 |
| 1561 | 0.94532 | 0.9743  | 0.98624 |
| 1560 | 0.94605 | 0.97389 | 0.98602 |
| 1559 | 0.94675 | 0.97426 | 0.98633 |
| 1558 | 0.94742 | 0.97422 | 0.98579 |
| 1557 | 0.94804 | 0.9754  | 0.9868  |
| 1556 | 0.94864 | 0.97533 | 0.98715 |

|      |         |         |         |
|------|---------|---------|---------|
| 1555 | 0.94922 | 0.97379 | 0.98622 |
| 1554 | 0.94977 | 0.9733  | 0.98587 |
| 1553 | 0.95027 | 0.97397 | 0.98639 |
| 1552 | 0.95073 | 0.97421 | 0.98658 |
| 1551 | 0.95119 | 0.97379 | 0.98627 |
| 1550 | 0.95164 | 0.97355 | 0.98612 |
| 1549 | 0.95208 | 0.97381 | 0.9863  |
| 1548 | 0.95252 | 0.97392 | 0.98637 |
| 1547 | 0.95292 | 0.97345 | 0.98591 |
| 1546 | 0.95329 | 0.97334 | 0.98592 |
| 1545 | 0.95363 | 0.97432 | 0.98692 |
| 1544 | 0.95396 | 0.97457 | 0.98731 |
| 1543 | 0.9543  | 0.97229 | 0.98521 |
| 1542 | 0.95462 | 0.97206 | 0.98502 |
| 1541 | 0.95491 | 0.97308 | 0.9868  |
| 1540 | 0.95518 | 0.97323 | 0.98635 |
| 1539 | 0.95543 | 0.97497 | 0.98667 |
| 1538 | 0.95565 | 0.97501 | 0.98685 |
| 1537 | 0.95583 | 0.97438 | 0.98662 |
| 1536 | 0.95596 | 0.97422 | 0.98664 |
| 1535 | 0.95606 | 0.97435 | 0.98657 |
| 1534 | 0.95616 | 0.9744  | 0.98644 |
| 1533 | 0.95625 | 0.97441 | 0.98627 |
| 1532 | 0.95636 | 0.97467 | 0.9864  |
| 1531 | 0.95649 | 0.97465 | 0.98644 |
| 1530 | 0.95657 | 0.97424 | 0.98609 |
| 1529 | 0.9566  | 0.97408 | 0.98587 |
| 1528 | 0.95662 | 0.97419 | 0.98592 |
| 1527 | 0.95662 | 0.97429 | 0.98611 |
| 1526 | 0.9566  | 0.97451 | 0.98637 |
| 1525 | 0.95656 | 0.97466 | 0.9865  |
| 1524 | 0.9565  | 0.97394 | 0.98597 |
| 1523 | 0.95644 | 0.97316 | 0.98562 |
| 1522 | 0.95636 | 0.97301 | 0.98583 |
| 1521 | 0.95625 | 0.97333 | 0.98584 |
| 1520 | 0.95612 | 0.9742  | 0.98611 |
| 1519 | 0.95601 | 0.97458 | 0.98633 |
| 1518 | 0.95592 | 0.97449 | 0.9863  |
| 1517 | 0.95582 | 0.97429 | 0.98606 |
| 1516 | 0.95574 | 0.97402 | 0.9855  |
| 1515 | 0.95571 | 0.97396 | 0.98514 |
| 1514 | 0.95569 | 0.97383 | 0.98485 |
| 1513 | 0.95569 | 0.97383 | 0.98467 |

|      |         |         |         |
|------|---------|---------|---------|
| 1512 | 0.95569 | 0.97421 | 0.98478 |
| 1511 | 0.95571 | 0.97447 | 0.98482 |
| 1510 | 0.95575 | 0.97376 | 0.98418 |
| 1509 | 0.95581 | 0.97406 | 0.98454 |
| 1508 | 0.95589 | 0.97578 | 0.98697 |
| 1507 | 0.95601 | 0.97359 | 0.98531 |
| 1506 | 0.95615 | 0.97198 | 0.98247 |
| 1505 | 0.95631 | 0.97409 | 0.98383 |
| 1504 | 0.95649 | 0.97419 | 0.98428 |
| 1503 | 0.95669 | 0.97314 | 0.98364 |
| 1502 | 0.9569  | 0.97253 | 0.98325 |
| 1501 | 0.95714 | 0.97303 | 0.98353 |
| 1500 | 0.95741 | 0.97328 | 0.98346 |
| 1499 | 0.95771 | 0.97302 | 0.9829  |
| 1498 | 0.95803 | 0.97274 | 0.98251 |
| 1497 | 0.95836 | 0.97238 | 0.98219 |
| 1496 | 0.95869 | 0.97208 | 0.98179 |
| 1495 | 0.95899 | 0.97199 | 0.98156 |
| 1494 | 0.95927 | 0.97175 | 0.98132 |
| 1493 | 0.95954 | 0.97139 | 0.98104 |
| 1492 | 0.95978 | 0.97098 | 0.98065 |
| 1491 | 0.95998 | 0.97087 | 0.98037 |
| 1490 | 0.96013 | 0.97092 | 0.98029 |
| 1489 | 0.96025 | 0.97039 | 0.97978 |
| 1488 | 0.9603  | 0.97003 | 0.97931 |
| 1487 | 0.96029 | 0.9699  | 0.97894 |
| 1486 | 0.96022 | 0.9692  | 0.97805 |
| 1485 | 0.96012 | 0.96843 | 0.97708 |
| 1484 | 0.95995 | 0.96793 | 0.97637 |
| 1483 | 0.95972 | 0.96745 | 0.9757  |
| 1482 | 0.95948 | 0.96683 | 0.97495 |
| 1481 | 0.95917 | 0.96619 | 0.97426 |
| 1480 | 0.95873 | 0.96557 | 0.97361 |
| 1479 | 0.95825 | 0.96501 | 0.97299 |
| 1478 | 0.95774 | 0.96469 | 0.97258 |
| 1477 | 0.95718 | 0.96451 | 0.97224 |
| 1476 | 0.95657 | 0.96382 | 0.97152 |
| 1475 | 0.95593 | 0.96279 | 0.97068 |
| 1474 | 0.95526 | 0.96233 | 0.97081 |
| 1473 | 0.95457 | 0.96155 | 0.97091 |
| 1472 | 0.95386 | 0.96033 | 0.97009 |
| 1471 | 0.95316 | 0.96012 | 0.96978 |
| 1470 | 0.95247 | 0.96027 | 0.96988 |

|      |         |         |         |
|------|---------|---------|---------|
| 1469 | 0.9518  | 0.96008 | 0.96976 |
| 1468 | 0.95113 | 0.95967 | 0.96946 |
| 1467 | 0.95048 | 0.9596  | 0.96939 |
| 1466 | 0.94983 | 0.95994 | 0.9697  |
| 1465 | 0.9492  | 0.9599  | 0.96969 |
| 1464 | 0.94861 | 0.95933 | 0.96916 |
| 1463 | 0.94805 | 0.95913 | 0.96893 |
| 1462 | 0.94753 | 0.95922 | 0.96904 |
| 1461 | 0.94704 | 0.95901 | 0.9689  |
| 1460 | 0.94659 | 0.95817 | 0.96824 |
| 1459 | 0.94617 | 0.95808 | 0.96816 |
| 1458 | 0.94578 | 0.95954 | 0.96972 |
| 1457 | 0.94542 | 0.9583  | 0.96909 |
| 1456 | 0.9451  | 0.95642 | 0.96707 |
| 1455 | 0.94481 | 0.95773 | 0.96773 |
| 1454 | 0.94456 | 0.95832 | 0.9681  |
| 1453 | 0.94434 | 0.95768 | 0.96742 |
| 1452 | 0.94414 | 0.95716 | 0.96688 |
| 1451 | 0.94397 | 0.95736 | 0.96692 |
| 1450 | 0.9438  | 0.95734 | 0.96683 |
| 1449 | 0.94364 | 0.95708 | 0.96653 |
| 1448 | 0.94347 | 0.95696 | 0.96635 |
| 1447 | 0.94329 | 0.95684 | 0.96611 |
| 1446 | 0.94308 | 0.95658 | 0.96575 |
| 1445 | 0.94285 | 0.95631 | 0.96543 |
| 1444 | 0.94259 | 0.95603 | 0.96518 |
| 1443 | 0.94233 | 0.95566 | 0.96486 |
| 1442 | 0.94204 | 0.95532 | 0.96459 |
| 1441 | 0.94173 | 0.95525 | 0.96454 |
| 1440 | 0.94139 | 0.95524 | 0.96453 |
| 1439 | 0.94104 | 0.95502 | 0.96433 |
| 1438 | 0.94066 | 0.95509 | 0.96438 |
| 1437 | 0.94027 | 0.95538 | 0.9647  |
| 1436 | 0.93988 | 0.95507 | 0.96447 |
| 1435 | 0.93948 | 0.95447 | 0.96397 |
| 1434 | 0.93908 | 0.95409 | 0.96375 |
| 1433 | 0.93867 | 0.95381 | 0.96363 |
| 1432 | 0.93829 | 0.95365 | 0.96353 |
| 1431 | 0.9379  | 0.95366 | 0.96347 |
| 1430 | 0.93751 | 0.95359 | 0.96333 |
| 1429 | 0.93717 | 0.95334 | 0.96306 |
| 1428 | 0.93686 | 0.95312 | 0.96288 |
| 1427 | 0.93659 | 0.95298 | 0.96286 |

|      |         |         |         |
|------|---------|---------|---------|
| 1426 | 0.93635 | 0.95272 | 0.96282 |
| 1425 | 0.93615 | 0.95236 | 0.96274 |
| 1424 | 0.93599 | 0.95201 | 0.96262 |
| 1423 | 0.93587 | 0.95177 | 0.96246 |
| 1422 | 0.93579 | 0.95161 | 0.96232 |
| 1421 | 0.93575 | 0.95151 | 0.96218 |
| 1420 | 0.93575 | 0.95193 | 0.96244 |
| 1419 | 0.9358  | 0.95239 | 0.96279 |
| 1418 | 0.93589 | 0.95207 | 0.96252 |
| 1417 | 0.93602 | 0.95187 | 0.96242 |
| 1416 | 0.93619 | 0.95215 | 0.96283 |
| 1415 | 0.93639 | 0.95239 | 0.96316 |
| 1414 | 0.93663 | 0.95252 | 0.96335 |
| 1413 | 0.93689 | 0.95283 | 0.96373 |
| 1412 | 0.93717 | 0.95334 | 0.96431 |
| 1411 | 0.93747 | 0.95379 | 0.96481 |
| 1410 | 0.93777 | 0.9541  | 0.96514 |
| 1409 | 0.93806 | 0.95436 | 0.96545 |
| 1408 | 0.93835 | 0.95461 | 0.96574 |
| 1407 | 0.93863 | 0.95483 | 0.96592 |
| 1406 | 0.93889 | 0.95503 | 0.96596 |
| 1405 | 0.93913 | 0.95507 | 0.96574 |
| 1404 | 0.93934 | 0.95495 | 0.96537 |
| 1403 | 0.93951 | 0.95489 | 0.96516 |
| 1402 | 0.93963 | 0.95479 | 0.96505 |
| 1401 | 0.93971 | 0.95458 | 0.96478 |
| 1400 | 0.93975 | 0.95443 | 0.9644  |
| 1399 | 0.93974 | 0.9543  | 0.96397 |
| 1398 | 0.93969 | 0.95409 | 0.96358 |
| 1397 | 0.93958 | 0.95402 | 0.96348 |
| 1396 | 0.93942 | 0.954   | 0.96351 |
| 1395 | 0.9392  | 0.95373 | 0.96317 |
| 1394 | 0.93894 | 0.95333 | 0.9625  |
| 1393 | 0.93864 | 0.95304 | 0.96187 |
| 1392 | 0.93831 | 0.95264 | 0.96131 |
| 1391 | 0.93793 | 0.95224 | 0.96081 |
| 1390 | 0.93753 | 0.95209 | 0.96046 |
| 1389 | 0.93711 | 0.95213 | 0.96016 |
| 1388 | 0.93665 | 0.95197 | 0.95971 |
| 1387 | 0.93618 | 0.95127 | 0.95886 |
| 1386 | 0.9357  | 0.95032 | 0.95775 |
| 1385 | 0.93521 | 0.94933 | 0.95651 |
| 1384 | 0.93474 | 0.94808 | 0.95487 |

|      |         |         |         |
|------|---------|---------|---------|
| 1383 | 0.93427 | 0.94663 | 0.95284 |
| 1382 | 0.93381 | 0.94513 | 0.95062 |
| 1381 | 0.93338 | 0.94349 | 0.94828 |
| 1380 | 0.93298 | 0.94169 | 0.94591 |
| 1379 | 0.93261 | 0.93995 | 0.94374 |
| 1378 | 0.93228 | 0.93846 | 0.94192 |
| 1377 | 0.93199 | 0.93724 | 0.9405  |
| 1376 | 0.93174 | 0.93638 | 0.93959 |
| 1375 | 0.93154 | 0.93573 | 0.93907 |
| 1374 | 0.93138 | 0.93487 | 0.93844 |
| 1373 | 0.93128 | 0.934   | 0.93775 |
| 1372 | 0.93123 | 0.93354 | 0.93743 |
| 1371 | 0.93123 | 0.9332  | 0.93735 |
| 1370 | 0.93129 | 0.9328  | 0.93729 |
| 1369 | 0.9314  | 0.93246 | 0.93725 |
| 1368 | 0.93156 | 0.93219 | 0.93723 |
| 1367 | 0.93176 | 0.93195 | 0.9372  |
| 1366 | 0.932   | 0.93174 | 0.9372  |
| 1365 | 0.93228 | 0.93178 | 0.93756 |
| 1364 | 0.93261 | 0.93238 | 0.93875 |
| 1363 | 0.93297 | 0.93327 | 0.94054 |
| 1362 | 0.93335 | 0.93399 | 0.94215 |
| 1361 | 0.93373 | 0.93475 | 0.94349 |
| 1360 | 0.9341  | 0.93568 | 0.94477 |
| 1359 | 0.93448 | 0.9365  | 0.94593 |
| 1358 | 0.93483 | 0.93729 | 0.94708 |
| 1357 | 0.93516 | 0.93825 | 0.9484  |
| 1356 | 0.93545 | 0.93934 | 0.94984 |
| 1355 | 0.9357  | 0.94036 | 0.95121 |
| 1354 | 0.93589 | 0.94123 | 0.9524  |
| 1353 | 0.93602 | 0.94199 | 0.95337 |
| 1352 | 0.93609 | 0.94257 | 0.95409 |
| 1351 | 0.9361  | 0.94295 | 0.9545  |
| 1350 | 0.93606 | 0.94318 | 0.95463 |
| 1349 | 0.93596 | 0.94329 | 0.9545  |
| 1348 | 0.93581 | 0.94324 | 0.95414 |
| 1347 | 0.93558 | 0.94305 | 0.95366 |
| 1346 | 0.93528 | 0.94277 | 0.95318 |
| 1345 | 0.93485 | 0.94249 | 0.95276 |
| 1344 | 0.93427 | 0.94229 | 0.95241 |
| 1343 | 0.93346 | 0.94216 | 0.95212 |
| 1342 | 0.93237 | 0.94207 | 0.95182 |
| 1341 | 0.93097 | 0.94197 | 0.95146 |

|      |         |         |         |
|------|---------|---------|---------|
| 1340 | 0.92923 | 0.94152 | 0.95083 |
| 1339 | 0.92715 | 0.94047 | 0.94973 |
| 1338 | 0.92478 | 0.93949 | 0.9487  |
| 1337 | 0.92216 | 0.93904 | 0.94824 |
| 1336 | 0.91936 | 0.93879 | 0.94808 |
| 1335 | 0.91646 | 0.93861 | 0.94811 |
| 1334 | 0.91351 | 0.93873 | 0.94851 |
| 1333 | 0.91056 | 0.93912 | 0.94922 |
| 1332 | 0.90766 | 0.93952 | 0.94995 |
| 1331 | 0.90484 | 0.93985 | 0.95059 |
| 1330 | 0.90215 | 0.94017 | 0.95115 |
| 1329 | 0.89961 | 0.94042 | 0.95157 |
| 1328 | 0.89723 | 0.94056 | 0.95182 |
| 1327 | 0.89504 | 0.94059 | 0.95195 |
| 1326 | 0.89305 | 0.94053 | 0.95197 |
| 1325 | 0.89128 | 0.94035 | 0.95176 |
| 1324 | 0.88974 | 0.94    | 0.9513  |
| 1323 | 0.88845 | 0.93946 | 0.95057 |
| 1322 | 0.88742 | 0.9386  | 0.94946 |
| 1321 | 0.88665 | 0.93734 | 0.94782 |
| 1320 | 0.88615 | 0.93575 | 0.94572 |
| 1319 | 0.88592 | 0.93403 | 0.9434  |
| 1318 | 0.88597 | 0.93248 | 0.94128 |
| 1317 | 0.8863  | 0.93133 | 0.93968 |
| 1316 | 0.88689 | 0.93062 | 0.93868 |
| 1315 | 0.88774 | 0.93025 | 0.93818 |
| 1314 | 0.88884 | 0.93015 | 0.93808 |
| 1313 | 0.89017 | 0.93028 | 0.93827 |
| 1312 | 0.89172 | 0.93061 | 0.93872 |
| 1311 | 0.89348 | 0.93125 | 0.93953 |
| 1310 | 0.89544 | 0.93226 | 0.94085 |
| 1309 | 0.89758 | 0.93362 | 0.94262 |
| 1308 | 0.89989 | 0.93516 | 0.94465 |
| 1307 | 0.90234 | 0.93669 | 0.94662 |
| 1306 | 0.90491 | 0.93807 | 0.94837 |
| 1305 | 0.90758 | 0.93929 | 0.94983 |
| 1304 | 0.91034 | 0.94039 | 0.95104 |
| 1303 | 0.91316 | 0.94143 | 0.95212 |
| 1302 | 0.91601 | 0.94242 | 0.95315 |
| 1301 | 0.91886 | 0.94334 | 0.95415 |
| 1300 | 0.92168 | 0.9442  | 0.95506 |
| 1299 | 0.92441 | 0.94503 | 0.9558  |
| 1298 | 0.92698 | 0.94581 | 0.95636 |



|      |         |         |         |
|------|---------|---------|---------|
| 1297 | 0.92936 | 0.94648 | 0.9567  |
| 1296 | 0.93147 | 0.94706 | 0.95685 |
| 1295 | 0.93327 | 0.94755 | 0.95687 |
| 1294 | 0.93472 | 0.94801 | 0.95686 |
| 1293 | 0.93583 | 0.94853 | 0.95692 |
| 1292 | 0.93662 | 0.94917 | 0.95709 |
| 1291 | 0.93712 | 0.9499  | 0.95733 |
| 1290 | 0.93738 | 0.95064 | 0.95758 |
| 1289 | 0.93748 | 0.95131 | 0.95774 |
| 1288 | 0.93746 | 0.95184 | 0.95773 |
| 1287 | 0.93736 | 0.95217 | 0.95752 |
| 1286 | 0.93721 | 0.95228 | 0.95712 |
| 1285 | 0.93701 | 0.95217 | 0.95652 |
| 1284 | 0.93675 | 0.95184 | 0.9557  |
| 1283 | 0.93644 | 0.9513  | 0.95462 |
| 1282 | 0.93609 | 0.95057 | 0.95327 |
| 1281 | 0.93568 | 0.9497  | 0.95177 |
| 1280 | 0.93522 | 0.9488  | 0.95035 |
| 1279 | 0.93471 | 0.94808 | 0.9493  |
| 1278 | 0.93416 | 0.94772 | 0.94881 |
| 1277 | 0.93358 | 0.94778 | 0.94889 |
| 1276 | 0.93297 | 0.94815 | 0.94937 |
| 1275 | 0.93235 | 0.94868 | 0.95004 |
| 1274 | 0.93171 | 0.94921 | 0.95072 |
| 1273 | 0.93107 | 0.94964 | 0.95125 |
| 1272 | 0.93042 | 0.94995 | 0.95158 |
| 1271 | 0.92976 | 0.95015 | 0.95171 |
| 1270 | 0.9291  | 0.95029 | 0.95169 |
| 1269 | 0.92843 | 0.95034 | 0.95153 |
| 1268 | 0.92777 | 0.9503  | 0.95127 |
| 1267 | 0.9271  | 0.95023 | 0.95095 |
| 1266 | 0.92643 | 0.95017 | 0.9506  |
| 1265 | 0.92577 | 0.95012 | 0.95022 |
| 1264 | 0.92512 | 0.95007 | 0.9498  |
| 1263 | 0.92449 | 0.95007 | 0.94938 |
| 1262 | 0.92386 | 0.95017 | 0.94904 |
| 1261 | 0.92326 | 0.95043 | 0.94885 |
| 1260 | 0.92266 | 0.95081 | 0.94886 |
| 1259 | 0.92209 | 0.95131 | 0.94907 |
| 1258 | 0.92154 | 0.95184 | 0.94938 |
| 1257 | 0.921   | 0.95238 | 0.9497  |
| 1256 | 0.9205  | 0.95292 | 0.95003 |
| 1255 | 0.92002 | 0.95347 | 0.95037 |

|      |         |         |         |
|------|---------|---------|---------|
| 1254 | 0.91957 | 0.954   | 0.95072 |
| 1253 | 0.91915 | 0.95449 | 0.95103 |
| 1252 | 0.91877 | 0.95491 | 0.95129 |
| 1251 | 0.91843 | 0.9553  | 0.95148 |
| 1250 | 0.91812 | 0.95564 | 0.95162 |
| 1249 | 0.91785 | 0.95592 | 0.95174 |
| 1248 | 0.91762 | 0.95614 | 0.95185 |
| 1247 | 0.91742 | 0.95629 | 0.95197 |
| 1246 | 0.91727 | 0.95636 | 0.95211 |
| 1245 | 0.91715 | 0.95635 | 0.95221 |
| 1244 | 0.91706 | 0.95631 | 0.95224 |
| 1243 | 0.91702 | 0.95622 | 0.95217 |
| 1242 | 0.917   | 0.95607 | 0.95199 |
| 1241 | 0.91702 | 0.95581 | 0.95172 |
| 1240 | 0.91707 | 0.95549 | 0.9514  |
| 1239 | 0.91715 | 0.95515 | 0.9511  |
| 1238 | 0.91726 | 0.95486 | 0.95086 |
| 1237 | 0.9174  | 0.95464 | 0.95069 |
| 1236 | 0.91758 | 0.95446 | 0.95056 |
| 1235 | 0.9178  | 0.95433 | 0.95049 |
| 1234 | 0.91806 | 0.95425 | 0.95051 |
| 1233 | 0.91836 | 0.9542  | 0.95065 |
| 1232 | 0.91872 | 0.95415 | 0.95088 |
| 1231 | 0.91912 | 0.95406 | 0.9511  |
| 1230 | 0.91958 | 0.9539  | 0.95121 |
| 1229 | 0.92009 | 0.95366 | 0.95116 |
| 1228 | 0.92065 | 0.95342 | 0.95106 |
| 1227 | 0.92125 | 0.9533  | 0.95114 |
| 1226 | 0.92189 | 0.95344 | 0.95166 |
| 1225 | 0.92256 | 0.9539  | 0.95273 |
| 1224 | 0.92327 | 0.95464 | 0.95424 |
| 1223 | 0.92401 | 0.95555 | 0.95598 |
| 1222 | 0.92477 | 0.95652 | 0.95778 |
| 1221 | 0.92555 | 0.95746 | 0.95949 |
| 1220 | 0.92635 | 0.95835 | 0.96109 |
| 1219 | 0.92716 | 0.95918 | 0.96253 |
| 1218 | 0.92798 | 0.95995 | 0.96383 |
| 1217 | 0.92881 | 0.96065 | 0.96497 |
| 1216 | 0.92966 | 0.96124 | 0.96595 |
| 1215 | 0.93051 | 0.96173 | 0.96675 |
| 1214 | 0.93137 | 0.96207 | 0.96736 |
| 1213 | 0.93223 | 0.96225 | 0.96773 |
| 1212 | 0.93309 | 0.96222 | 0.96785 |

|      |         |         |         |
|------|---------|---------|---------|
| 1211 | 0.93394 | 0.962   | 0.96769 |
| 1210 | 0.93478 | 0.96156 | 0.96725 |
| 1209 | 0.93561 | 0.96092 | 0.96657 |
| 1208 | 0.93643 | 0.96013 | 0.9657  |
| 1207 | 0.93722 | 0.95925 | 0.96472 |
| 1206 | 0.938   | 0.9583  | 0.96366 |
| 1205 | 0.93876 | 0.95729 | 0.96255 |
| 1204 | 0.93949 | 0.95626 | 0.96144 |
| 1203 | 0.94019 | 0.95531 | 0.96046 |
| 1202 | 0.94086 | 0.95453 | 0.95975 |
| 1201 | 0.94149 | 0.954   | 0.95937 |
| 1200 | 0.94209 | 0.95374 | 0.95931 |
| 1199 | 0.94264 | 0.95372 | 0.95948 |
| 1198 | 0.94316 | 0.9539  | 0.95979 |
| 1197 | 0.94363 | 0.95431 | 0.96024 |
| 1196 | 0.94405 | 0.955   | 0.96091 |
| 1195 | 0.94442 | 0.95595 | 0.96186 |
| 1194 | 0.94474 | 0.95705 | 0.96305 |
| 1193 | 0.94501 | 0.95822 | 0.96439 |
| 1192 | 0.94522 | 0.9594  | 0.96575 |
| 1191 | 0.94537 | 0.96053 | 0.96701 |
| 1190 | 0.94545 | 0.96157 | 0.9681  |
| 1189 | 0.94546 | 0.96245 | 0.96898 |
| 1188 | 0.94539 | 0.96313 | 0.96964 |
| 1187 | 0.94524 | 0.96359 | 0.97007 |
| 1186 | 0.945   | 0.96383 | 0.97026 |
| 1185 | 0.94467 | 0.96388 | 0.97025 |
| 1184 | 0.94425 | 0.96377 | 0.97007 |
| 1183 | 0.94373 | 0.96347 | 0.9697  |
| 1182 | 0.94312 | 0.96298 | 0.96914 |
| 1181 | 0.94241 | 0.96229 | 0.96845 |
| 1180 | 0.9416  | 0.96145 | 0.96769 |
| 1179 | 0.9407  | 0.96047 | 0.96685 |
| 1178 | 0.93971 | 0.95939 | 0.96587 |
| 1177 | 0.93863 | 0.95818 | 0.96471 |
| 1176 | 0.93747 | 0.95682 | 0.96337 |
| 1175 | 0.93625 | 0.95527 | 0.96187 |
| 1174 | 0.93498 | 0.95352 | 0.96023 |
| 1173 | 0.93366 | 0.95153 | 0.95842 |
| 1172 | 0.9323  | 0.94926 | 0.95635 |
| 1171 | 0.93093 | 0.94667 | 0.95394 |
| 1170 | 0.92954 | 0.94374 | 0.95114 |
| 1169 | 0.92816 | 0.94045 | 0.94799 |

|      |         |         |         |
|------|---------|---------|---------|
| 1168 | 0.92679 | 0.93686 | 0.94452 |
| 1167 | 0.92545 | 0.93303 | 0.94082 |
| 1166 | 0.92414 | 0.92903 | 0.9369  |
| 1165 | 0.92286 | 0.92496 | 0.93284 |
| 1164 | 0.92164 | 0.92095 | 0.92877 |
| 1163 | 0.92048 | 0.91719 | 0.92495 |
| 1162 | 0.91937 | 0.91383 | 0.92156 |
| 1161 | 0.91833 | 0.91102 | 0.9188  |
| 1160 | 0.91737 | 0.9089  | 0.91681 |
| 1159 | 0.91648 | 0.90758 | 0.91571 |
| 1158 | 0.91567 | 0.90706 | 0.91552 |
| 1157 | 0.91492 | 0.90723 | 0.91611 |
| 1156 | 0.91426 | 0.90801 | 0.91735 |
| 1155 | 0.91366 | 0.9093  | 0.91909 |
| 1154 | 0.91312 | 0.91095 | 0.92116 |
| 1153 | 0.91264 | 0.91275 | 0.92337 |
| 1152 | 0.91222 | 0.91458 | 0.92553 |
| 1151 | 0.91184 | 0.9164  | 0.9275  |
| 1150 | 0.9115  | 0.91821 | 0.92928 |
| 1149 | 0.91119 | 0.92007 | 0.9309  |
| 1148 | 0.9109  | 0.92199 | 0.93249 |
| 1147 | 0.91063 | 0.92391 | 0.93409 |
| 1146 | 0.91035 | 0.9257  | 0.93565 |
| 1145 | 0.91009 | 0.92724 | 0.93705 |
| 1144 | 0.90981 | 0.92851 | 0.9382  |
| 1143 | 0.90952 | 0.92951 | 0.93899 |
| 1142 | 0.90922 | 0.93023 | 0.93936 |
| 1141 | 0.90888 | 0.93059 | 0.93928 |
| 1140 | 0.90851 | 0.93052 | 0.93875 |
| 1139 | 0.9081  | 0.92995 | 0.93775 |
| 1138 | 0.90762 | 0.9289  | 0.93628 |
| 1137 | 0.90709 | 0.92743 | 0.93443 |
| 1136 | 0.90648 | 0.92568 | 0.93238 |
| 1135 | 0.9058  | 0.92378 | 0.93035 |
| 1134 | 0.90505 | 0.92186 | 0.92848 |
| 1133 | 0.90422 | 0.91993 | 0.92678 |
| 1132 | 0.90331 | 0.91802 | 0.92521 |
| 1131 | 0.90232 | 0.91609 | 0.92366 |
| 1130 | 0.90126 | 0.91411 | 0.92205 |
| 1129 | 0.90012 | 0.91202 | 0.92027 |
| 1128 | 0.89891 | 0.90977 | 0.9183  |
| 1127 | 0.89765 | 0.90738 | 0.91615 |
| 1126 | 0.89633 | 0.90489 | 0.9139  |

|      |         |         |         |
|------|---------|---------|---------|
| 1125 | 0.89497 | 0.9023  | 0.9116  |
| 1124 | 0.89357 | 0.89963 | 0.90925 |
| 1123 | 0.89214 | 0.89694 | 0.90689 |
| 1122 | 0.89069 | 0.89431 | 0.90457 |
| 1121 | 0.88922 | 0.89178 | 0.90229 |
| 1120 | 0.88773 | 0.88937 | 0.90014 |
| 1119 | 0.88625 | 0.88716 | 0.89824 |
| 1118 | 0.88476 | 0.88514 | 0.89654 |
| 1117 | 0.88328 | 0.88316 | 0.89486 |
| 1116 | 0.88182 | 0.88112 | 0.89304 |
| 1115 | 0.88037 | 0.87902 | 0.89109 |
| 1114 | 0.87894 | 0.87694 | 0.88914 |
| 1113 | 0.87754 | 0.87496 | 0.88734 |
| 1112 | 0.87616 | 0.87325 | 0.88585 |
| 1111 | 0.8748  | 0.87206 | 0.88491 |
| 1110 | 0.87348 | 0.8715  | 0.88462 |
| 1109 | 0.87217 | 0.87147 | 0.8849  |
| 1108 | 0.8709  | 0.87173 | 0.88555 |
| 1107 | 0.86964 | 0.87206 | 0.88631 |
| 1106 | 0.86841 | 0.87217 | 0.88687 |
| 1105 | 0.86721 | 0.87181 | 0.88693 |
| 1104 | 0.86604 | 0.87084 | 0.88632 |
| 1103 | 0.86488 | 0.86927 | 0.88504 |
| 1102 | 0.86374 | 0.86711 | 0.88311 |
| 1101 | 0.86261 | 0.86449 | 0.88063 |
| 1100 | 0.8615  | 0.86168 | 0.87788 |
| 1099 | 0.86039 | 0.85902 | 0.87521 |
| 1098 | 0.85929 | 0.85674 | 0.87291 |
| 1097 | 0.85821 | 0.85491 | 0.87114 |
| 1096 | 0.85713 | 0.85348 | 0.86986 |
| 1095 | 0.85608 | 0.8523  | 0.86888 |
| 1094 | 0.85503 | 0.8511  | 0.86794 |
| 1093 | 0.854   | 0.84971 | 0.86685 |
| 1092 | 0.85297 | 0.84812 | 0.86556 |
| 1091 | 0.85195 | 0.84643 | 0.86409 |
| 1090 | 0.85092 | 0.84469 | 0.86247 |
| 1089 | 0.84989 | 0.84286 | 0.86072 |
| 1088 | 0.84885 | 0.84088 | 0.85882 |
| 1087 | 0.8478  | 0.83868 | 0.85672 |
| 1086 | 0.84675 | 0.8362  | 0.85433 |
| 1085 | 0.84568 | 0.83347 | 0.85159 |
| 1084 | 0.8446  | 0.83061 | 0.8486  |
| 1083 | 0.8435  | 0.82786 | 0.8456  |

|      |         |         |         |
|------|---------|---------|---------|
| 1082 | 0.84237 | 0.8254  | 0.84289 |
| 1081 | 0.84123 | 0.8233  | 0.84072 |
| 1080 | 0.84005 | 0.82153 | 0.83918 |
| 1079 | 0.83885 | 0.82003 | 0.83823 |
| 1078 | 0.83762 | 0.81874 | 0.8377  |
| 1077 | 0.83636 | 0.81757 | 0.8374  |
| 1076 | 0.83507 | 0.81644 | 0.83721 |
| 1075 | 0.83376 | 0.81538 | 0.83715 |
| 1074 | 0.83242 | 0.81442 | 0.83726 |
| 1073 | 0.83105 | 0.81348 | 0.83747 |
| 1072 | 0.82966 | 0.81239 | 0.83759 |
| 1071 | 0.82825 | 0.81105 | 0.83742 |
| 1070 | 0.82682 | 0.80936 | 0.83675 |
| 1069 | 0.82538 | 0.80718 | 0.8354  |
| 1068 | 0.82395 | 0.80438 | 0.83324 |
| 1067 | 0.82252 | 0.801   | 0.83036 |
| 1066 | 0.82111 | 0.79717 | 0.82688 |
| 1065 | 0.81972 | 0.793   | 0.82295 |
| 1064 | 0.81837 | 0.78868 | 0.81875 |
| 1063 | 0.81706 | 0.78454 | 0.81458 |
| 1062 | 0.81579 | 0.78084 | 0.81074 |
| 1061 | 0.81456 | 0.77772 | 0.80741 |
| 1060 | 0.81339 | 0.77529 | 0.80475 |
| 1059 | 0.81226 | 0.77368 | 0.80292 |
| 1058 | 0.81118 | 0.77282 | 0.80189 |
| 1057 | 0.81014 | 0.77243 | 0.80142 |
| 1056 | 0.80915 | 0.7723  | 0.8013  |
| 1055 | 0.80821 | 0.77239 | 0.80143 |
| 1054 | 0.8073  | 0.77265 | 0.80174 |
| 1053 | 0.80643 | 0.77298 | 0.80212 |
| 1052 | 0.80559 | 0.77338 | 0.8026  |
| 1051 | 0.80479 | 0.7739  | 0.80326 |
| 1050 | 0.80404 | 0.77446 | 0.80396 |
| 1049 | 0.80332 | 0.77485 | 0.80445 |
| 1048 | 0.80266 | 0.77498 | 0.80459 |
| 1047 | 0.80204 | 0.77499 | 0.8045  |
| 1046 | 0.80148 | 0.77501 | 0.80439 |
| 1045 | 0.80097 | 0.77511 | 0.8044  |
| 1044 | 0.80051 | 0.77537 | 0.80466 |
| 1043 | 0.8001  | 0.7758  | 0.80519 |
| 1042 | 0.79975 | 0.77625 | 0.80579 |
| 1041 | 0.79944 | 0.77646 | 0.80615 |
| 1040 | 0.79919 | 0.77627 | 0.80607 |

|      |         |         |         |
|------|---------|---------|---------|
| 1039 | 0.799   | 0.7756  | 0.80544 |
| 1038 | 0.79886 | 0.77439 | 0.80425 |
| 1037 | 0.79876 | 0.77267 | 0.80254 |
| 1036 | 0.79872 | 0.77059 | 0.80047 |
| 1035 | 0.79872 | 0.76838 | 0.79824 |
| 1034 | 0.79876 | 0.76622 | 0.79599 |
| 1033 | 0.79885 | 0.76417 | 0.79382 |
| 1032 | 0.79899 | 0.7622  | 0.79179 |
| 1031 | 0.79918 | 0.76028 | 0.78992 |
| 1030 | 0.79942 | 0.75844 | 0.78817 |
| 1029 | 0.79971 | 0.7567  | 0.78658 |
| 1028 | 0.80006 | 0.75516 | 0.78524 |
| 1027 | 0.80046 | 0.75394 | 0.78434 |
| 1026 | 0.80093 | 0.75313 | 0.78401 |
| 1025 | 0.80147 | 0.75273 | 0.7842  |
| 1024 | 0.80209 | 0.75262 | 0.78479 |
| 1023 | 0.80278 | 0.75273 | 0.78568 |
| 1022 | 0.80356 | 0.75302 | 0.78677 |
| 1021 | 0.80443 | 0.75336 | 0.78789 |
| 1020 | 0.80539 | 0.75367 | 0.78885 |
| 1019 | 0.80645 | 0.75402 | 0.78962 |
| 1018 | 0.80761 | 0.75457 | 0.79027 |
| 1017 | 0.80885 | 0.75543 | 0.79093 |
| 1016 | 0.81018 | 0.7567  | 0.79179 |
| 1015 | 0.81158 | 0.75853 | 0.7931  |
| 1014 | 0.81305 | 0.761   | 0.79497 |
| 1013 | 0.81458 | 0.76391 | 0.79723 |
| 1012 | 0.81617 | 0.76695 | 0.79956 |
| 1011 | 0.81781 | 0.76995 | 0.8018  |
| 1010 | 0.8195  | 0.77283 | 0.80384 |
| 1009 | 0.82122 | 0.77547 | 0.80559 |
| 1008 | 0.82299 | 0.7778  | 0.807   |
| 1007 | 0.82479 | 0.77983 | 0.80817 |
| 1006 | 0.82663 | 0.7815  | 0.80916 |
| 1005 | 0.82849 | 0.7826  | 0.80986 |
| 1004 | 0.83038 | 0.78291 | 0.80999 |
| 1003 | 0.8323  | 0.78231 | 0.80934 |
| 1002 | 0.83423 | 0.78067 | 0.80773 |
| 1001 | 0.83618 | 0.77794 | 0.80518 |
| 1000 | 0.83815 | 0.77444 | 0.8021  |
| 999  | 0.84013 | 0.7708  | 0.79912 |
| 998  | 0.84212 | 0.76763 | 0.79682 |
| 997  | 0.84413 | 0.76534 | 0.79554 |

|     |         |         |         |
|-----|---------|---------|---------|
| 996 | 0.84613 | 0.76422 | 0.79549 |
| 995 | 0.84814 | 0.76441 | 0.79678 |
| 994 | 0.85014 | 0.76584 | 0.79931 |
| 993 | 0.85212 | 0.76828 | 0.80283 |
| 992 | 0.85409 | 0.77158 | 0.80709 |
| 991 | 0.85603 | 0.77564 | 0.81194 |
| 990 | 0.85794 | 0.78033 | 0.81723 |
| 989 | 0.85982 | 0.78545 | 0.82271 |
| 988 | 0.86166 | 0.79085 | 0.82822 |
| 987 | 0.86345 | 0.79644 | 0.83365 |
| 986 | 0.8652  | 0.80213 | 0.83898 |
| 985 | 0.86691 | 0.8078  | 0.84424 |
| 984 | 0.86857 | 0.8134  | 0.84943 |
| 983 | 0.87018 | 0.81888 | 0.8545  |
| 982 | 0.87174 | 0.8242  | 0.85935 |
| 981 | 0.87325 | 0.82928 | 0.86391 |
| 980 | 0.87471 | 0.83408 | 0.86818 |
| 979 | 0.87612 | 0.83855 | 0.87218 |
| 978 | 0.87748 | 0.84263 | 0.87587 |
| 977 | 0.87881 | 0.84627 | 0.87915 |
| 976 | 0.88009 | 0.84946 | 0.88195 |
| 975 | 0.88133 | 0.8522  | 0.88426 |
| 974 | 0.88254 | 0.85451 | 0.88615 |
| 973 | 0.88371 | 0.85641 | 0.88768 |
| 972 | 0.88484 | 0.858   | 0.88889 |
| 971 | 0.88594 | 0.85938 | 0.88986 |
| 970 | 0.88701 | 0.8606  | 0.89074 |
| 969 | 0.88804 | 0.86169 | 0.89162 |
| 968 | 0.88903 | 0.86266 | 0.89254 |
| 967 | 0.89    | 0.86362 | 0.8935  |
| 966 | 0.89095 | 0.86471 | 0.89449 |
| 965 | 0.89187 | 0.86596 | 0.89553 |
| 964 | 0.8928  | 0.86734 | 0.89668 |
| 963 | 0.89371 | 0.86885 | 0.89806 |
| 962 | 0.89463 | 0.87056 | 0.89971 |
| 961 | 0.89554 | 0.87252 | 0.90164 |
| 960 | 0.89647 | 0.87472 | 0.9038  |
| 959 | 0.8974  | 0.87714 | 0.90616 |
| 958 | 0.89834 | 0.87968 | 0.90864 |
| 957 | 0.89929 | 0.88219 | 0.9111  |
| 956 | 0.90025 | 0.88461 | 0.91343 |
| 955 | 0.90123 | 0.88694 | 0.91562 |
| 954 | 0.90221 | 0.8892  | 0.9177  |



|     |         |         |         |
|-----|---------|---------|---------|
| 953 | 0.90321 | 0.89137 | 0.91963 |
| 952 | 0.90422 | 0.89342 | 0.92143 |
| 951 | 0.90525 | 0.89535 | 0.92313 |
| 950 | 0.90628 | 0.89717 | 0.92477 |
| 949 | 0.90733 | 0.89884 | 0.92632 |
| 948 | 0.90838 | 0.90036 | 0.92774 |
| 947 | 0.90943 | 0.90178 | 0.92903 |
| 946 | 0.91047 | 0.90313 | 0.93018 |
| 945 | 0.9115  | 0.90439 | 0.93122 |
| 944 | 0.91251 | 0.90555 | 0.93219 |
| 943 | 0.91349 | 0.90662 | 0.9331  |
| 942 | 0.91445 | 0.90761 | 0.93395 |
| 941 | 0.91537 | 0.9085  | 0.93468 |
| 940 | 0.91625 | 0.9093  | 0.9353  |
| 939 | 0.91709 | 0.91008 | 0.93587 |
| 938 | 0.91789 | 0.91086 | 0.93643 |
| 937 | 0.91864 | 0.9116  | 0.93699 |
| 936 | 0.91935 | 0.91228 | 0.93756 |
| 935 | 0.92002 | 0.91294 | 0.93814 |
| 934 | 0.92064 | 0.91357 | 0.93869 |
| 933 | 0.92122 | 0.91415 | 0.93919 |
| 932 | 0.92176 | 0.9147  | 0.93961 |
| 931 | 0.92225 | 0.91524 | 0.94001 |
| 930 | 0.9227  | 0.91582 | 0.94044 |
| 929 | 0.92311 | 0.91643 | 0.94093 |
| 928 | 0.92349 | 0.91704 | 0.94147 |
| 927 | 0.92383 | 0.91765 | 0.94203 |
| 926 | 0.92413 | 0.91823 | 0.94257 |
| 925 | 0.9244  | 0.9188  | 0.94305 |
| 924 | 0.92464 | 0.91936 | 0.94347 |
| 923 | 0.92483 | 0.9199  | 0.94384 |
| 922 | 0.92498 | 0.92042 | 0.94417 |
| 921 | 0.92508 | 0.92091 | 0.9445  |
| 920 | 0.92513 | 0.92136 | 0.9448  |
| 919 | 0.92515 | 0.92175 | 0.94504 |
| 918 | 0.92512 | 0.92203 | 0.94518 |
| 917 | 0.92506 | 0.92217 | 0.94522 |
| 916 | 0.92496 | 0.92219 | 0.94518 |
| 915 | 0.92483 | 0.92211 | 0.94509 |
| 914 | 0.92467 | 0.92196 | 0.94492 |
| 913 | 0.92448 | 0.92169 | 0.9446  |
| 912 | 0.92426 | 0.92122 | 0.94412 |
| 911 | 0.92402 | 0.92056 | 0.94349 |

|     |         |         |         |
|-----|---------|---------|---------|
| 910 | 0.92375 | 0.91974 | 0.94277 |
| 909 | 0.92346 | 0.91881 | 0.94199 |
| 908 | 0.92316 | 0.9178  | 0.94113 |
| 907 | 0.92284 | 0.91669 | 0.94017 |
| 906 | 0.92252 | 0.91545 | 0.93907 |
| 905 | 0.92219 | 0.91405 | 0.93779 |
| 904 | 0.92186 | 0.91245 | 0.93626 |
| 903 | 0.92153 | 0.91064 | 0.93441 |
| 902 | 0.92122 | 0.9086  | 0.93214 |
| 901 | 0.92092 | 0.90629 | 0.9294  |
| 900 | 0.92064 | 0.90374 | 0.92623 |
| 899 | 0.92038 | 0.90108 | 0.92284 |
| 898 | 0.92015 | 0.89855 | 0.91953 |
| 897 | 0.91993 | 0.89637 | 0.9167  |
| 896 | 0.91974 | 0.89481 | 0.91472 |
| 895 | 0.91958 | 0.89409 | 0.91386 |
| 894 | 0.91945 | 0.89428 | 0.91415 |
| 893 | 0.91936 | 0.89526 | 0.91546 |
| 892 | 0.9193  | 0.89687 | 0.9176  |
| 891 | 0.9193  | 0.89897 | 0.92036 |
| 890 | 0.91933 | 0.90138 | 0.9235  |
| 889 | 0.91942 | 0.90391 | 0.92673 |
| 888 | 0.91954 | 0.90641 | 0.92985 |
| 887 | 0.91971 | 0.90882 | 0.93275 |
| 886 | 0.91992 | 0.91107 | 0.93539 |
| 885 | 0.92016 | 0.91313 | 0.93776 |
| 884 | 0.92045 | 0.91496 | 0.93986 |
| 883 | 0.92077 | 0.91663 | 0.94175 |
| 882 | 0.92114 | 0.91816 | 0.94342 |
| 881 | 0.92153 | 0.91959 | 0.94485 |
| 880 | 0.92194 | 0.92088 | 0.94609 |
| 879 | 0.92237 | 0.92201 | 0.94719 |
| 878 | 0.92282 | 0.92296 | 0.94818 |
| 877 | 0.92326 | 0.92378 | 0.94905 |
| 876 | 0.9237  | 0.92458 | 0.9498  |
| 875 | 0.92414 | 0.92538 | 0.95042 |
| 874 | 0.92456 | 0.92613 | 0.95097 |
| 873 | 0.92497 | 0.92674 | 0.9515  |
| 872 | 0.92536 | 0.92724 | 0.95206 |
| 871 | 0.92574 | 0.92771 | 0.95264 |
| 870 | 0.92611 | 0.92816 | 0.95312 |
| 869 | 0.92647 | 0.92857 | 0.95345 |
| 868 | 0.92681 | 0.92892 | 0.95367 |

|     |         |         |         |
|-----|---------|---------|---------|
| 867 | 0.92714 | 0.92925 | 0.9539  |
| 866 | 0.92745 | 0.92957 | 0.95419 |
| 865 | 0.92775 | 0.92986 | 0.9545  |
| 864 | 0.92804 | 0.9301  | 0.95474 |
| 863 | 0.92831 | 0.93032 | 0.95488 |
| 862 | 0.92856 | 0.93054 | 0.95494 |
| 861 | 0.92879 | 0.93078 | 0.95496 |
| 860 | 0.92899 | 0.931   | 0.95496 |
| 859 | 0.92916 | 0.93118 | 0.95498 |
| 858 | 0.92931 | 0.93132 | 0.95506 |
| 857 | 0.92943 | 0.93142 | 0.9552  |
| 856 | 0.92953 | 0.9315  | 0.95537 |
| 855 | 0.92961 | 0.93156 | 0.95552 |
| 854 | 0.92968 | 0.93163 | 0.95561 |
| 853 | 0.92973 | 0.93169 | 0.95562 |
| 852 | 0.92977 | 0.93173 | 0.95554 |
| 851 | 0.92979 | 0.93178 | 0.95543 |
| 850 | 0.92979 | 0.93184 | 0.95536 |
| 849 | 0.92977 | 0.93191 | 0.95531 |
| 848 | 0.92973 | 0.93193 | 0.95524 |
| 847 | 0.92967 | 0.93192 | 0.95515 |
| 846 | 0.92958 | 0.9319  | 0.95508 |
| 845 | 0.92947 | 0.93188 | 0.95504 |
| 844 | 0.92933 | 0.9319  | 0.95502 |
| 843 | 0.92916 | 0.93196 | 0.95501 |
| 842 | 0.92896 | 0.93204 | 0.95503 |
| 841 | 0.92872 | 0.93209 | 0.95508 |
| 840 | 0.92846 | 0.93205 | 0.95513 |
| 839 | 0.92815 | 0.93194 | 0.95515 |
| 838 | 0.92782 | 0.93181 | 0.95515 |
| 837 | 0.92747 | 0.9317  | 0.95513 |
| 836 | 0.9271  | 0.93163 | 0.95512 |
| 835 | 0.92672 | 0.93164 | 0.95516 |
| 834 | 0.92633 | 0.93168 | 0.95523 |
| 833 | 0.92593 | 0.93167 | 0.95528 |
| 832 | 0.92552 | 0.93162 | 0.95524 |
| 831 | 0.92511 | 0.93156 | 0.95511 |
| 830 | 0.92469 | 0.9315  | 0.95494 |
| 829 | 0.92427 | 0.93142 | 0.95482 |
| 828 | 0.92385 | 0.93133 | 0.95484 |
| 827 | 0.92344 | 0.93126 | 0.95496 |
| 826 | 0.92304 | 0.93121 | 0.95502 |
| 825 | 0.92266 | 0.93114 | 0.95489 |

|     |         |         |         |
|-----|---------|---------|---------|
| 824 | 0.9223  | 0.93104 | 0.9546  |
| 823 | 0.92197 | 0.93095 | 0.95428 |
| 822 | 0.92166 | 0.93086 | 0.95403 |
| 821 | 0.92137 | 0.93075 | 0.95386 |
| 820 | 0.92112 | 0.93062 | 0.95374 |
| 819 | 0.92091 | 0.93047 | 0.95365 |
| 818 | 0.92073 | 0.93031 | 0.95351 |
| 817 | 0.9206  | 0.93017 | 0.95333 |
| 816 | 0.9205  | 0.93006 | 0.95316 |
| 815 | 0.92045 | 0.92996 | 0.95308 |
| 814 | 0.92045 | 0.92986 | 0.95307 |
| 813 | 0.92054 | 0.92974 | 0.95304 |
| 812 | 0.9207  | 0.92961 | 0.95292 |
| 811 | 0.92096 | 0.9295  | 0.95269 |
| 810 | 0.92129 | 0.92939 | 0.9524  |
| 809 | 0.92163 | 0.92928 | 0.95212 |
| 808 | 0.92191 | 0.92917 | 0.95189 |
| 807 | 0.92202 | 0.92908 | 0.95173 |
| 806 | 0.92189 | 0.92899 | 0.95162 |
| 805 | 0.92144 | 0.92888 | 0.95149 |
| 804 | 0.92065 | 0.92872 | 0.95132 |
| 803 | 0.91951 | 0.92856 | 0.95111 |
| 802 | 0.91806 | 0.9284  | 0.95094 |
| 801 | 0.91635 | 0.92824 | 0.95081 |
| 800 | 0.9144  | 0.92805 | 0.95069 |
| 799 | 0.91228 | 0.92785 | 0.95054 |
| 798 | 0.91003 | 0.9277  | 0.95038 |
| 797 | 0.90768 | 0.92756 | 0.95019 |
| 796 | 0.90528 | 0.92738 | 0.95001 |
| 795 | 0.90286 | 0.92718 | 0.94987 |
| 794 | 0.90044 | 0.92699 | 0.94978 |
| 793 | 0.89805 | 0.92679 | 0.94963 |
| 792 | 0.89571 | 0.92657 | 0.94937 |
| 791 | 0.89344 | 0.92633 | 0.94905 |
| 790 | 0.89127 | 0.92608 | 0.94877 |
| 789 | 0.88919 | 0.92578 | 0.94853 |
| 788 | 0.88722 | 0.92544 | 0.94828 |
| 787 | 0.88536 | 0.9251  | 0.948   |
| 786 | 0.88361 | 0.92483 | 0.94773 |
| 785 | 0.88198 | 0.92458 | 0.94752 |
| 784 | 0.88047 | 0.92431 | 0.94735 |
| 783 | 0.87909 | 0.92399 | 0.94716 |
| 782 | 0.87785 | 0.92362 | 0.9469  |

|     |         |         |         |
|-----|---------|---------|---------|
| 781 | 0.87675 | 0.92324 | 0.94658 |
| 780 | 0.87581 | 0.92292 | 0.94626 |
| 779 | 0.87505 | 0.92272 | 0.94599 |
| 778 | 0.87446 | 0.92257 | 0.94576 |
| 777 | 0.87406 | 0.92233 | 0.94551 |
| 776 | 0.87386 | 0.92197 | 0.94523 |
| 775 | 0.87386 | 0.92158 | 0.94496 |
| 774 | 0.87407 | 0.92127 | 0.94471 |
| 773 | 0.87449 | 0.92104 | 0.94448 |
| 772 | 0.87512 | 0.92084 | 0.94425 |
| 771 | 0.87597 | 0.92064 | 0.94403 |
| 770 | 0.87702 | 0.92041 | 0.9438  |
| 769 | 0.87827 | 0.92014 | 0.94354 |
| 768 | 0.8797  | 0.91988 | 0.94327 |
| 767 | 0.8813  | 0.91968 | 0.94301 |
| 766 | 0.88306 | 0.91953 | 0.94278 |
| 765 | 0.88496 | 0.9194  | 0.94254 |
| 764 | 0.88696 | 0.91919 | 0.94225 |
| 763 | 0.88901 | 0.91889 | 0.94191 |
| 762 | 0.89103 | 0.9185  | 0.94153 |
| 761 | 0.89296 | 0.91808 | 0.94119 |
| 760 | 0.89469 | 0.91768 | 0.9409  |
| 759 | 0.89616 | 0.91734 | 0.94062 |
| 758 | 0.89731 | 0.91711 | 0.94029 |
| 757 | 0.89815 | 0.91695 | 0.93986 |
| 756 | 0.89871 | 0.91678 | 0.93936 |
| 755 | 0.89905 | 0.91655 | 0.93888 |
| 754 | 0.89924 | 0.9163  | 0.93848 |
| 753 | 0.89935 | 0.91599 | 0.93811 |
| 752 | 0.89941 | 0.91557 | 0.93765 |
| 751 | 0.89946 | 0.91508 | 0.9371  |
| 750 | 0.8995  | 0.91462 | 0.93655 |
| 749 | 0.89954 | 0.91422 | 0.93611 |
| 748 | 0.89959 | 0.91385 | 0.93578 |
| 747 | 0.89964 | 0.91348 | 0.93547 |
| 746 | 0.89969 | 0.91311 | 0.93508 |
| 745 | 0.89973 | 0.91274 | 0.93457 |
| 744 | 0.89976 | 0.91233 | 0.934   |
| 743 | 0.89975 | 0.91187 | 0.93342 |
| 742 | 0.89971 | 0.91138 | 0.93289 |
| 741 | 0.89963 | 0.91086 | 0.93235 |
| 740 | 0.8995  | 0.91033 | 0.93183 |
| 739 | 0.89932 | 0.90981 | 0.93135 |

|     |         |         |         |
|-----|---------|---------|---------|
| 738 | 0.89908 | 0.90931 | 0.93095 |
| 737 | 0.89879 | 0.90879 | 0.93055 |
| 736 | 0.89845 | 0.90825 | 0.9301  |
| 735 | 0.89807 | 0.90772 | 0.92957 |
| 734 | 0.89764 | 0.90718 | 0.92899 |
| 733 | 0.89718 | 0.90657 | 0.92833 |
| 732 | 0.89668 | 0.90588 | 0.9276  |
| 731 | 0.89616 | 0.90521 | 0.92686 |
| 730 | 0.8956  | 0.90458 | 0.92617 |
| 729 | 0.89502 | 0.90388 | 0.92552 |
| 728 | 0.89441 | 0.90308 | 0.92485 |
| 727 | 0.89379 | 0.90227 | 0.92416 |
| 726 | 0.89314 | 0.9015  | 0.92348 |
| 725 | 0.89255 | 0.90071 | 0.92281 |
| 724 | 0.89194 | 0.89989 | 0.92208 |
| 723 | 0.89131 | 0.89911 | 0.92129 |
| 722 | 0.89065 | 0.89834 | 0.92042 |
| 721 | 0.88997 | 0.89749 | 0.9195  |
| 720 | 0.88927 | 0.89666 | 0.91869 |
| 719 | 0.88855 | 0.89607 | 0.91816 |
| 718 | 0.8878  | 0.89565 | 0.91783 |
| 717 | 0.88703 | 0.89513 | 0.91744 |
| 716 | 0.88624 | 0.89453 | 0.91689 |
| 715 | 0.88542 | 0.89407 | 0.91633 |
| 714 | 0.88458 | 0.8937  | 0.91583 |
| 713 | 0.88372 | 0.89321 | 0.91534 |
| 712 | 0.88284 | 0.89262 | 0.91486 |
| 711 | 0.88194 | 0.89212 | 0.91446 |
| 710 | 0.88101 | 0.89174 | 0.91416 |
| 709 | 0.88006 | 0.89133 | 0.91389 |
| 708 | 0.87908 | 0.89081 | 0.91362 |
| 707 | 0.87809 | 0.89027 | 0.91338 |
| 706 | 0.87707 | 0.88982 | 0.91319 |
| 705 | 0.87603 | 0.88941 | 0.91312 |
| 704 | 0.87497 | 0.88896 | 0.91316 |
| 703 | 0.87388 | 0.88853 | 0.91326 |
| 702 | 0.87277 | 0.88829 | 0.9133  |
| 701 | 0.87164 | 0.88819 | 0.91324 |
